# Supplementary material for: Systems-Based Analysis of the Sarcocystis neurona Genome Identifies Pathways That Contribute to a Heteroxenous Life Cycle
Source: PubMed Central journal article supplement — mBio. 2015 Feb 10;6(1):e02445-14. doi: 10.1128/mBio.02445-14 (PMC4337577; doi:10.1128/mbio.02445-14), 2015-02-10

(A)

Primers used for PCR amplification of the *rps4* fragment insert

| Primer name | Sequence                     | Location      | Primer combination | Expected product size |
|-------------|------------------------------|---------------|--------------------|-----------------------|
| Forward 1   | 5' -TGCTGGAATTGTATTCCT-3'    | 29,198-29,215 | F1-R1              | 510 bp                |
| Forward 2   | 5' -TCCTCCTACTAATCTAATAG-3'  | 29,431-29,450 | F2-R1              | 277 bp                |
| Reverse 1   | 5' -ACGGTATTTTAACTTAC-3'     | 29,691-29,708 | F1-R3              | 635 bp                |
| Reverse 3   | 5' -GAGCCACTGATTTGTAATCAG-3' | 29,813-29,833 | F2-R3              | 402 bp                |

(B)

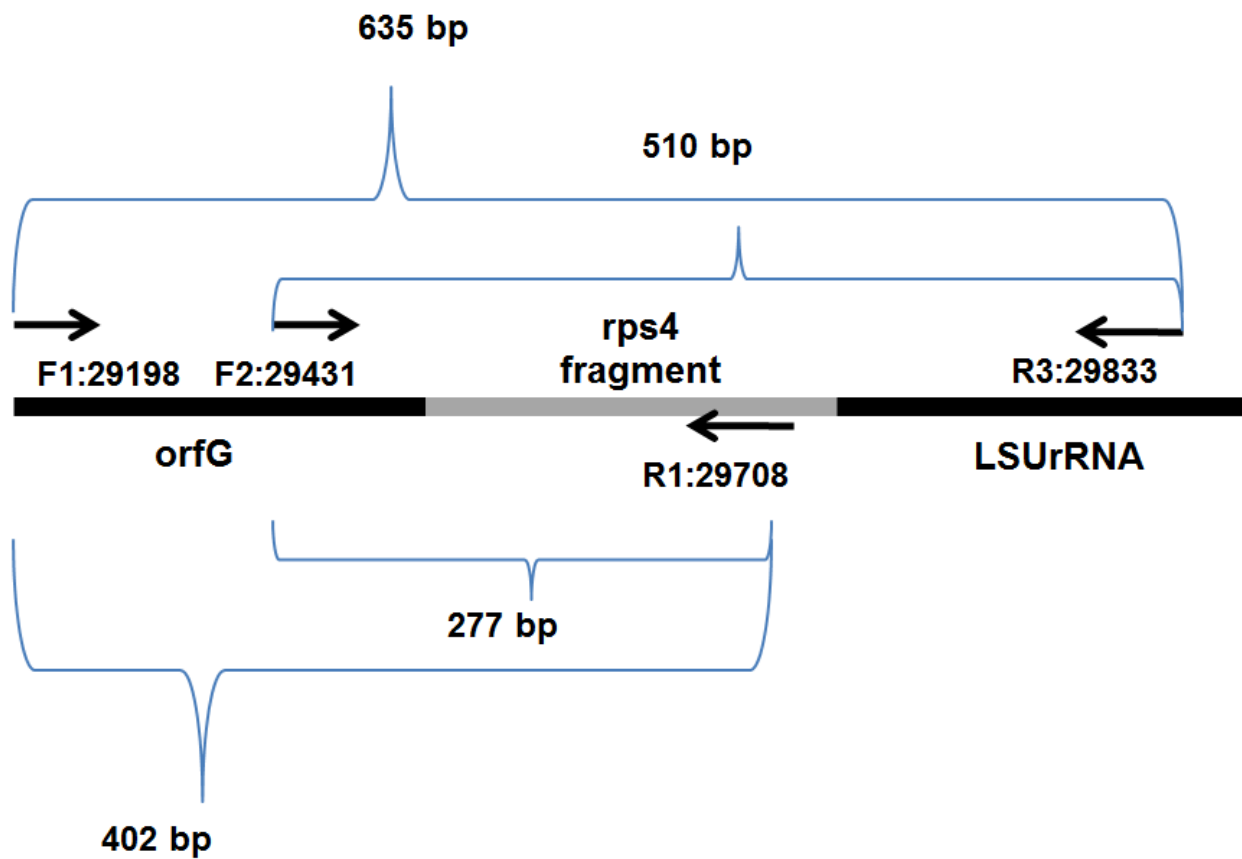

(C)

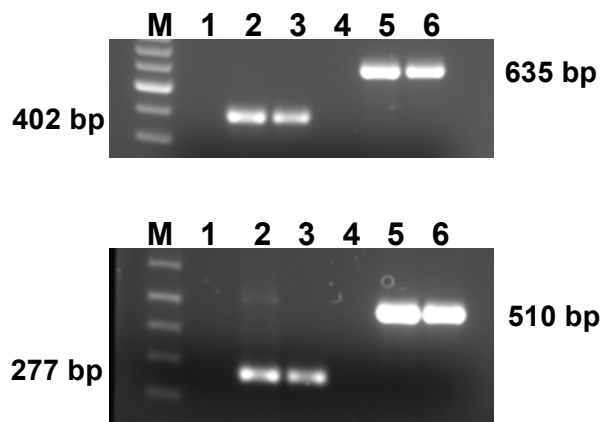

Supplement: mbo004142136sf2.pdf [file mbo004142136sf2.pdf]
