# Supplementary material for: Systems-Based Analysis of the Sarcocystis neurona Genome Identifies Pathways That Contribute to a Heteroxenous Life Cycle
Source: PubMed Central journal article supplement — mBio. 2015 Feb 10;6(1):e02445-14. doi: 10.1128/mBio.02445-14 (PMC4337577; doi:10.1128/mbio.02445-14), 2015-02-10
Supplement: mbo004142136sf3.pdf [file mbo004142136sf3.pdf]

```

PCR_rps4_insert1-LSUR3      -----GGG-----GAGGGTCAT-----CCTTT 17
PCR_rps4_insert2-ORFG      TTTTGGAGGCCATTGTTAATCAGAAGGTTATGGGTTCAAATCCCTTT 50
Apicoplast_rps4_insert     -----
Apicoplast_rps4            -----

PCR_rps4_insert1-LSUR3      AT-AGTTGATTAA-TTTTATCAAATAGATCTAATTTTACTAATAATGGG 65
PCR_rps4_insert2-ORFG      ATCAGTTGATTAAATTTTATCAAATAGATCTAATTTTACTAATAATGGG 100
Apicoplast_rps4_insert     -----ATGGG 5
Apicoplast_rps4            -----ATGGG 5
                               *****

PCR_rps4_insert1-LSUR3      AAAATATTTAGGTGCTAAACTTAAAAAATTACGGTATTTAATCTTACTT 115
PCR_rps4_insert2-ORFG      AAAATATTTAGGTGCTAAACTTAAAAAATTACGGTATTTAATCTTACTT 150
Apicoplast_rps4_insert     AAAATATTTAGGTGCTAAACTTAAAAAATTACGGTATTTAATCTTACTT 55
Apicoplast_rps4            AAAATATTTAGGTGCTAAACTTAAAAAATTACGGTATTTAATCTTACTT 55
                               *****

PCR_rps4_insert1-LSUR3      TTTTATCTGGATTTTCTACTAAATTTAAAAAAGAGGCTTGTTTGATA 165
PCR_rps4_insert2-ORFG      TTTTATCTGGATTTTCTACTAAATTTAAAAAAGAGGCTTGTTTGATA 200
Apicoplast_rps4_insert     TTTTATCTGGATTTTCTACTAAATTTAAAAAAGAGGCTTGTTTGATA 105
Apicoplast_rps4            TTTTATCTGGATTTTCTACTAAATTTAAAAAAGAGGCTTGTTTGATA 105
                               *****

PCR_rps4_insert1-LSUR3      AAAAAAAAAAGTAAATTTCTGTCTTCTATCTAAATTTATAGAAAAACA 215
PCR_rps4_insert2-ORFG      AAAAAAAAAAGTAAATTTCTGTCTTCTATCTAAATTTATAGAAAAACA 250
Apicoplast_rps4_insert     AAAAAAAAAAGTAAATTTCTGTCTTCTATCTAAATTTATAGAAAAACA 155
Apicoplast_rps4            AAAAAAAAAAGTAAATTTCTGTCTTCTATCTAAATTTATAGAAAAACA 155
                               *****

PCR_rps4_insert1-LSUR3      AAAATTAATATAAATTATGGACTTAAAGAAAATCAAATTAATAAATATT 265
PCR_rps4_insert2-ORFG      AAAATTAATATAAATTATGGACTTAAAGAAAATCAAATTAATAAATATT 300
Apicoplast_rps4_insert     AAAATTAATATAAATTATGGACTTAAAGAAAATCAAATTAATAAATATT 205
Apicoplast_rps4            AAAATTAATATAAATTATGGACTTAAAGAAAATCAAATTAATAAATATT 205
                               *****

PCR_rps4_insert1-LSUR3      TAAATATATTAAATTTTAAATATTTAATTTA GAATGAACTATATA 315
PCR_rps4_insert2-ORFG      TAAATATATTAAATTTTAAATATTTAATTTA GAATGAACTATATA 350
Apicoplast_rps4_insert     TAAATATATTAAATTTTAAATATTTAATTTA ----- 240
Apicoplast_rps4            TAAATATATTAAATTTTAAATATTTAATTTA GT-TCAAATATTGA 254
                               *****

PCR_rps4_insert1-LSUR3      AATA--TTTATATTC--TTTAC--GAAATA-----ATCAATTA 347
PCR_rps4_insert2-ORFG      AATA--TTTATATTC--TTTAC--GAAATA-----ATCAATTA 382
Apicoplast_rps4_insert     -----
Apicoplast_rps4            ATTACGTTTAGATGCAAGTTTATTTAGAATAGGATTTAGTAGATCTATTA 304

PCR_rps4_insert1-LSUR3      ATTAATACTATTAGATTA-----GTAGGAGGATTT-----AATTTAAA 385
PCR_rps4_insert2-ORFG      ATTAATACTATTAGATTA-----GTAGGAGGATTT-----AATTTAAA 420
Apicoplast_rps4_insert     -----
Apicoplast_rps4            ATCAAGCTAAACAATTTATCAACCATGGACATATTTTGTTAATTTTAAA 354

PCR_rps4_insert1-LSUR3      CACAATAAA---TAAAT-TAATTTTAAACAAGATAATTTATTT-TCT 429
PCR_rps4_insert2-ORFG      CACAATAAA---TAAAT-TAATTTTAAACAAGATAATTTATTT-TCT 464
Apicoplast_rps4_insert     -----
Apicoplast_rps4            CTAGTTAAAAATCCAATATGCTTATTACAGAAAAAGATTTAATTTATAT 404

PCR_rps4_insert1-LSUR3      TATATATTTATAGATTAATGCTTTATCTTATTTAAAAAATTTAAACAA 479
PCR_rps4_insert2-ORFG      TATATATTTATAGATTAATGCTTTATCTTATTTAAAAAATTTAAACAA 514
Apicoplast_rps4_insert     -----
Apicoplast_rps4            TA-ATCCACAAAAAGTAAGTA--TTATTTAATTTGTAGAATT-AATTTA 450

PCR_rps4_insert1-LSUR3      CCTGATGGTGTGTTT-----TTTGAATTATCTGAATTTGCTTTTGATG- 522
PCR_rps4_insert2-ORFG      CCTGATGGTGTGTTT-----TTTGAATTATCTGAATTTGCTTTTGATG- 557
Apicoplast_rps4_insert     -----
Apicoplast_rps4            TTTTATAGATATTATAAGAAATTAATTTTCTTTATATAATATTTGTGC 500

PCR_rps4_insert1-LSUR3      ---ATATTTTCATATT---ATTCAA-----TACCTATAAATCT-TT 555
PCR_rps4_insert2-ORFG      ---ATATTTTCATATT---ATTCAA-----TACCTATAAATCT-TC 590
Apicoplast_rps4_insert     -----
Apicoplast_rps4            AGAATTTTAAATTTAAATTAATAAAGAAATTTTATTTTAAATTTATTT 550

PCR_rps4_insert1-LSUR3      CTTTACTAAATATAAAAAATTTTATTTAATTTAGGAAAAATTTTCAG 605
PCR_rps4_insert2-ORFG      --TTTACTAAATAAAGAAA-----GG----- 609
Apicoplast_rps4_insert     -----
Apicoplast_rps4            TTTTAAATTCATTTAAGAATCTT-----ATATTAATTTATTTTA 590

PCR_rps4_insert1-LSUR3      CAAA 610
PCR_rps4_insert2-ORFG      -----
Apicoplast_rps4_insert     -----
Apicoplast_rps4            T---- 591

```
