# Supplementary material for: Systems-Based Analysis of the Sarcocystis neurona Genome Identifies Pathways That Contribute to a Heteroxenous Life Cycle
Source: PubMed Central journal article supplement — mBio. 2015 Feb 10;6(1):e02445-14. doi: 10.1128/mBio.02445-14 (PMC4337577; doi:10.1128/mbio.02445-14), 2015-02-10
Supplement: mbo004142136sf4.pdf [file mbo004142136sf4.pdf]

(A)

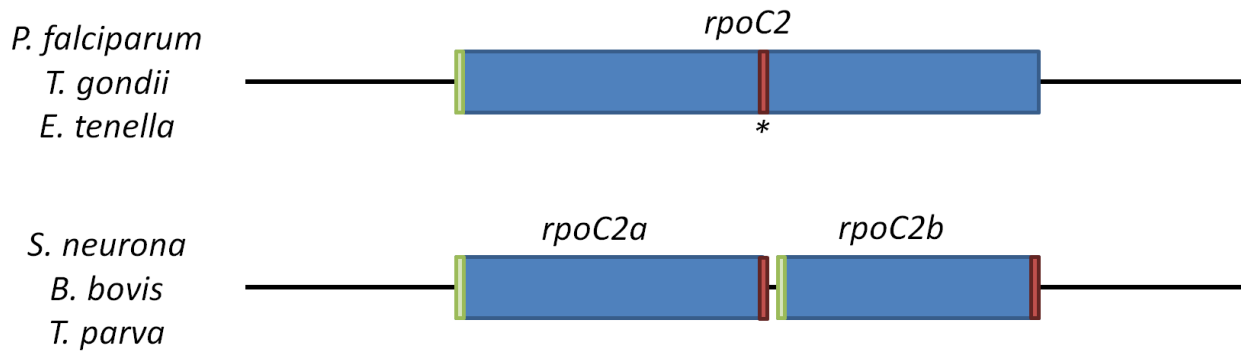

(B)

*rpoC2a* 5'-uuuaauauagaaauggaaaaaaugaaaauaaaauuaauua-3' *rpoC2b*  
+1frame: ·F·N·I·E·M·E·\*·N·E·N·K·I·N·  
+2frame: ·L·I·\*·K·W·N·K·M·K·I·K·L·I·  
+3frame: ·\*·Y·R·N·G·I·K·\*·K·\*·N·\*·L·
