# Supplementary material for: Systems-Based Analysis of the Sarcocystis neurona Genome Identifies Pathways That Contribute to a Heteroxenous Life Cycle
Source: PubMed Central journal article supplement — mBio. 2015 Feb 10;6(1):e02445-14. doi: 10.1128/mBio.02445-14 (PMC4337577; doi:10.1128/mbio.02445-14), 2015-02-10
Supplement: mbo004142136st2.pdf [file mbo004142136st2.pdf]

**Supplemental Table S2A.** List of IMC homologs in *S. neurona* SN1 genome.

The 29 IMC proteins identified in *T. gondii* were derived with reference to: Kono, M., Prusty, D., Parkinson, J. and Gilberger, T.W. (2013)

A membranous system in the spotlight: The apicomplexan inner membrane complex and its adaptation to an endoparasitic life style. *Frontiers in Bioscience*. 18. 982-992.

| <i>T. gondii</i> gene ID | <i>T. gondii</i> gene name | <i>S. neurona</i> gene ID | Comments         |
|--------------------------|----------------------------|---------------------------|------------------|
| TGME49_019320            | TgGAP50                    | SRCN_2420                 |                  |
| TGME49_023940            | TgGAP45                    | SRCN_4968                 |                  |
| TGME49_049850            | TgGAP40                    | --                        | Manually refined |
| TGME49_033030            | TgGAP70                    | --                        | Absent           |
| TGME49_035470            | TgMyoA                     | --                        | Manually refined |
| TGME49_057680            | TgMLC1                     | SRCN_1686                 |                  |
| TGME49_031640            | TgALV1                     | SRCN_2336                 |                  |
| TGME49_216000            | TgALV3                     | SRCN_3639                 |                  |
| TGME49_031630            | TgALV4                     | SRCN_2337                 |                  |
| TGME49_075670            | TgALV5                     | SRCN_3468                 |                  |
| TGME49_026220            | TgALV6                     | --                        | Absent           |
| TGME49_039770            | TgALV7                     | --                        | Absent           |
| TGME49_053470            | TgALV8                     | --                        | Fragments        |
| TGME49_060540            | TgALV9                     | SRCN_3153                 |                  |
| TGME49_024520            | TgALV10                    | SRCN_5144                 |                  |
| TGME49_024530            | TgALV11                    | --                        | Fragments        |
| TGME49_030210            | TgALV12                    | SRCN_3369                 |                  |
| TGME49_020270            | TgIMC6                     | SRCN_2873                 |                  |
| TGME49_022220            | TgIMC7                     | SRCN_5562                 |                  |
| TGME49_048700            | TgIMC12                    | SRCN_450                  |                  |
| TGME49_110440            | TgMORN1                    | SRCN_2977                 |                  |
| TGME49_058410            | TgPhIL1                    | --                        | Manually refined |
| TGME49_009340            | TgISP1                     | SRCN_5775                 |                  |
| TGME49_058540            | TgISP2                     | SRCN_4363                 |                  |
| TGME49_094350            | TgISP3                     | SRCN_3543                 |                  |
| TGME49_063420            | TgISP4                     |                           | Manually refined |
| TGME49_044470            | TgCRMP                     | SRCN_1290                 |                  |
| TGME49_052880            | TgCRMP                     | SRCN_2572                 |                  |
| TGME49_032940            | TgHsp20                    | SRCN_6477*                |                  |

**Table S2B.** Changes in enzyme:gene assignments for the application of new constraints in *iCS382*

|           | Previous gene mapping                     | New gene mapping                                        |
|-----------|-------------------------------------------|---------------------------------------------------------|
| 1.5.1.34  | None                                      | TGME49_285750                                           |
| 3.1.1.32  | None                                      | TGME49_313600                                           |
| 2.3.1.41  | TGME49_031890 TGME49_094820 TGME49_004560 | TGME49_231890                                           |
| 2.7.1.23  | TGME49_044700 TGME49_092300               | TGME49_244700                                           |
| 2.7.7.13  | TGME49_057960 TGME49_072640               | TGME49_257960                                           |
| 2.7.7.60  | TGME49_016260 TGME49_106260               | TGME49_306260                                           |
| 1.10.2.2  | TGME49_120220                             | TGME49_288750 TGME49_320140 TGME49_320220               |
| 1.14.16.2 | TGME49_012740                             | TGME49_212740 TGME49_287510                             |
| 1.2.1.3   | TGME49_088450                             | TGME49_264000 TGME49_288450                             |
| 1.4.1.1   | TGME49_115260                             | TGME49_203500 TGME49_315260                             |
| 2.3.1.12  | TGME49_006610                             | TGME49_206610 TGME49_319920                             |
| 2.3.3.1   | TGME49_068890                             | TGME49_203110 TGME49_268890                             |
| 2.4.2.1   | TGME49_110640                             | TGME49_307030 TGME49_307040 TGME49_310640               |
| 2.6.1.42  | TGME49_097850                             | TGME49_281500 TGME49_297850                             |
| 2.7.1.137 | TGME49_015700                             | TGME49_215700 TGME49_276170 TGME49_316430               |
| 2.7.8.5   | TGME49_046530                             | TGME49_246530 TGME49_254540                             |
| 3.1.1.5   | TGME49_031370                             | TGME49_226390 TGME49_231370 TGME49_305260 TGME49_306330 |
| 3.1.3.4   | TGME49_047360                             | TGME49_230690 TGME49_247360                             |
| 3.3.1.1   | TGME49_025050                             | TGME49_225050 TGME49_326800                             |
| 4.4.1.17  | TGME49_114040                             | TGME49_293390 TGME49_314042                             |
| 6.4.1.2a  | TGME49_018560                             | TGME49_218560 TGME49_284190                             |
| 6.4.1.2b  | TGME49_021320                             | TGME49_221320 TGME49_284190                             |
| 1.8.4.9   | TGME49_038040                             | None                                                    |
| 2.3.1.168 | TGME49_119920                             | None                                                    |
| 2.7.1.32  | TGME49_320630                             | None                                                    |
| 2.7.6.3   | TGME49_059550                             | None                                                    |

Supplemental Table S2C. Predicted impact of single reaction knockouts on parasite growth

| Reaction   | Description                                                | Subsystem                 | Relative differences |                   |                     |                   |                                  |                          |                                        |                       |
|------------|------------------------------------------------------------|---------------------------|----------------------|-------------------|---------------------|-------------------|----------------------------------|--------------------------|----------------------------------------|-----------------------|
|            |                                                            |                           | Toxoplasma gondii    |                   | Sarcocystis neurona |                   | Differences in carbon source (%) |                          | Differences between Sarco and Toxo (%) |                       |
|            |                                                            |                           | With only glucose    | With only sucrose | With only glucose   | With only sucrose | Toxo: glucose - sucrose          | Sarco: glucose - sucrose | Glucose: Toxo - Sarco                  | Sucrose: Toxo - Sarco |
| 1.1.1.1    | alcohol dehydrogenase                                      | Misc                      | 0.999640005          | 0.999520476       | 0.999498126         | 0.999396909       | 0.011952855                      | 0.010121677              | 0.014187913                            | 0.012356735           |
| 1.1.1.100a | 3-oxoacyl-[acp] reductase                                  | Fatty Acid Synthesis      | 0                    | 0                 | 0                   | 0                 | 0                                | 0                        | 0                                      | 0                     |
| 1.1.1.100b | 3-oxoacyl-[acp] reductase                                  | Fatty Acid Synthesis      | -1.8753E-17          | -3.44621E-17      | 3.01758E-15         | -9.08772E-18      | 1.57091E-15                      | 3.02667E-13              | -3.03633E-13                           | -2.53743E-15          |
| 1.1.1.100c | 3-oxoacyl-[acp] reductase                                  | Fatty Acid Synthesis      | 0                    | 0                 | 0                   | 0                 | 0                                | 0                        | 0                                      | 0                     |
| 1.1.1.100d | 3-oxoacyl-[acp] reductase                                  | Fatty Acid Synthesis      | -1.8753E-17          | -3.44621E-17      | 3.01758E-15         | -9.08772E-18      | 1.57091E-15                      | 3.02667E-13              | -3.03633E-13                           | -2.53743E-15          |
| 1.1.1.100e | 3-oxoacyl-[acp] reductase                                  | Fatty Acid Synthesis      | -1.8753E-17          | -3.44621E-17      | 3.01758E-15         | -9.08772E-18      | 1.57091E-15                      | 3.02667E-13              | -3.03633E-13                           | -2.53743E-15          |
| 1.1.1.100f | 3-oxoacyl-[acp] reductase                                  | Fatty Acid Synthesis      | 0                    | 0                 | 0                   | 0                 | 0                                | 0                        | 0                                      | 0                     |
| 1.1.1.100g | 3-oxoacyl-[acp] reductase                                  | Fatty Acid Synthesis      | -1.8753E-17          | -3.44621E-17      | 3.01758E-15         | -9.08772E-18      | 1.57091E-15                      | 3.02667E-13              | -3.03633E-13                           | -2.53743E-15          |
| 1.1.1.100h | 3-oxoacyl-[acp] reductase                                  | Fatty Acid Synthesis      | -4.71186E-25         | -1.61003E-16      | 9.74717E-16         | 1.35057E-16       | 1.61003E-14                      | 8.3966E-14               | -9.74717E-14                           | -2.9606E-14           |
| 1.1.1.102  | 3-dehydrosphinganine reductase                             | Phospholipid              | 0                    | 0                 | 0                   | 0                 | 0                                | 0                        | 0                                      | 0                     |
| 1.1.1.153  | sepiapterin reductase                                      | Bioppterin                | 0                    | 0                 | -1.03646E-28        | 0                 | 0                                | -1.03646E-26             | 1.03646E-26                            | 0                     |
| 1.1.1.169  | 2-dehydropantoate 2-reductase                              | CoA Synthesis             | 4.48662E-15          | -2.01223E-14      | -7.35677E-13        | -4.27925E-14      | 2.46089E-12                      | -6.92884E-11             | 7.40164E-11                            | 2.26702E-12           |
| 1.1.1.205  | IMP dehydrogenase                                          | Purine                    | -4.85343E-21         | -5.93737E-22      | 4.80379E-26         | -4.98388E-27      | -4.25967E-19                     | 5.30218E-24              | -4.85347E-19                           | -5.93732E-20          |
| 1.1.1.267  | 1-deoxy-D-xylulose-5-phosphate reductoisomerase            | Terpenoid Backbone        | 0                    | 0                 | 0                   | 0                 | 0                                | 0                        | 0                                      | 0                     |
| 1.1.1.27   | L-lactate dehydrogenase                                    | Glycolysis                | 0.548794889          | 0.365399255       | 0.385660047         | 0.290195542       | 18.33956337                      | 9.546450591              | 16.31348411                            | 7.520371338           |
| 1.1.1.35a  | 3-hydroxyacyl-CoA dehydrogenase                            | Branched Amino Acid       | 1                    | 1                 | 0.89914251          | 0.996463615       | 3.9968E-13                       | -9.732110504             | 10.08574896                            | 0.353638453           |
| 1.1.1.35b  | 3-hydroxyacyl-CoA dehydrogenase                            | Beta Oxidation            | 1                    | 1                 | 1                   | 1                 | 1                                | 1.4988E-12               | -5.9952E-13                            | 8.99281E-13           |
| 1.1.1.37   | malate dehydrogenase                                       | TCA Cycle                 | 0.760384315          | 0.909046378       | 0.427025467         | 0.992667487       | -14.86620629                     | -56.56420202             | 33.3358848                             | -8.362110933          |
| 1.1.1.42   | isocitrate dehydrogenase (NADP+)                           | TCA Cycle                 | 0.98592745           | 0.994576299       | 0.579376315         | 0.997577411       | -0.864884917                     | -41.8201096              | 40.65511352                            | -0.300111159          |
| 1.1.1.44   | phosphogluconate dehydrogenase (decarboxylating)           | Pentose Phosphate         | 0.849895296          | 0.644766931       | 0                   | 0                 | 20.51283654                      | 0                        | 84.9895296                             | 64.47669307           |
| 1.1.1.49   | glucose-6-phosphate dehydrogenase                          | Pentose Phosphate         | 0.849895296          | 0.644766931       | 0                   | 0                 | 20.51283654                      | 0                        | 84.9895296                             | 64.47669307           |
| 1.1.1.8    | glycerol-3-phosphate dehydrogenase (NAD+)                  | Phospholipid              | 4.17692E-28          | 0                 | 0                   | -1.98611E-14      | 4.17692E-26                      | 1.98611E-12              | 4.17692E-26                            | 1.98611E-12           |
| 1.1.1.95   | phosphoglycerate dehydrogenase                             | Serine/Glycine            | 0.976866879          | 0.965043468       | 1                   | 1                 | 1.182341086                      | 9.99201E-13              | -2.313312098                           | -3.495653184          |
| 1.10.2.2   | ubiquinol-cytochrome-c reductase                           | Oxidative Phosphorylation | 0                    | 0                 | 0                   | 0                 | 0                                | 0                        | 0                                      | 0                     |
| 1.11.1.6   | catalase                                                   | Misc                      | 4.62452E-13          | 3.62528E-13       | -1.35755E-13        | 5.64573E-13       | 9.99237E-12                      | -7.00328E-11             | 5.98207E-11                            | -2.02045E-11          |
| 1.14.-.-   | sphingolipid delta-4 desaturase                            | Phospholipid              | 0                    | 0                 | 0                   | 0                 | 0                                | 0                        | 0                                      | 0                     |
| 1.14.16.2  | tyrosine 3-monoxygenase                                    | Bioppterin                | 1                    | 1                 | 1                   | 1                 | 1                                | -1.09912E-12             | -6.99441E-13                           | -1.79856E-12          |
| 1.14.19.2  | acyl-[acyl-carrier-protein] desaturase                     | Fatty Acid Synthesis      | 3.17433E-27          | -2.93242E-16      | 3.84044E-16         | 6.54513E-17       | 2.93242E-14                      | 3.18593E-14              | -3.58693E-14                           | -3.58693E-14          |
| 1.14.19.3  | linoleoyl-CoA desaturase                                   | Fatty Acid Synthesis      | -4.71186E-25         | -1.61003E-16      | 9.74717E-16         | 1.35057E-16       | 1.61003E-14                      | 8.3966E-14               | -9.74717E-14                           | -2.9606E-14           |
| 1.14.19.6  | Delta12-fatty-acyl desaturase                              | Fatty Acid Synthesis      | 6.04204E-27          | 5.10827E-16       | -1.00509E-15        | 6.54513E-17       | -5.10827E-14                     | -1.07054E-13             | 1.00509E-13                            | 4.45376E-14           |
| 1.15.1.1   | superoxide dismutase                                       | Misc                      | 1                    | 1                 | 1                   | 1                 | 1                                | 0                        | 0                                      | 0                     |
| 1.17.1.2a  | 4-hydroxy-3-methylbut-2-enyl diphosphate reductase         | Terpenoid Backbone        | 0                    | 0                 | 0                   | 0                 | 0                                | 0                        | 0                                      | 0                     |
| 1.17.1.2b  | 4-hydroxy-3-methylbut-2-enyl diphosphate reductase         | Terpenoid Backbone        | 0                    | 0                 | 0                   | 0                 | 0                                | 0                        | 0                                      | 0                     |
| 1.17.4.1a  | ribonucleoside-diphosphate reductase                       | Purine                    | 1                    | 1                 | 1                   | 1                 | -1.19904E-12                     | 1.04916E-11              | -7.19425E-12                           | 4.4964E-12            |
| 1.17.4.1b  | ribonucleoside-diphosphate reductase                       | Pyrimidine                | 1                    | 1                 | 1                   | 1                 | 4.996E-13                        | 1.03917E-11              | -8.29337E-12                           | 1.59872E-12           |
| 1.17.4.1c  | ribonucleoside-diphosphate reductase                       | Purine                    | 0                    | 0                 | 0                   | 0                 | 0                                | 0                        | 0                                      | 0                     |
| 1.17.4.1d  | ribonucleoside-diphosphate reductase                       | Pyrimidine                | 1                    | 1                 | 1                   | 1                 | -2.9976E-13                      | 4.996E-12                | -7.99361E-12                           | -2.69784E-12          |
| 1.17.7.1   | (E)-4-hydroxy-3-methylbut-2-enyl-diphosphate synthase      | Terpenoid Backbone        | 0                    | 0                 | 0                   | 0                 | 0                                | 0                        | 0                                      | 0                     |
| 1.2.1.11   | aspartate-semialdehyde dehydrogenase                       | Lysine                    | 0                    | 0                 | 0                   | 0                 | 0                                | 0                        | 0                                      | 0                     |
| 1.2.1.12a  | glyceraldehyde-3-phosphate dehydrogenase (phosphorylating) | Glycolysis                | 1                    | 0.722669781       | 1                   | 1                 | 27.73302188                      | 7.99361E-12              | -6.39488E-12                           | -27.73302188          |
| 1.2.1.12b  | glyceraldehyde-3-phosphate dehydrogenase (phosphorylating) | Glycolysis                | 1                    | 1                 | 1                   | 1                 | 3.9968E-13                       | 6.19504E-12              | -3.9968E-12                            | 1.79856E-12           |
| 1.2.1.27   | methylmalonate-semialdehyde dehydrogenase (acylating)      | Branched Amino Acid       | 0.948789313          | 0.981697664       | 1                   | 1                 | -3.290835128                     | 0                        | -5.121068701                           | -1.830233573          |
| 1.2.1.3a   | aldehyde dehydrogenase (NAD+)                              | Glycolysis                | 0.999640005          | 0.999520476       | 0.999498126         | 0.999396909       | 0.011952855                      | 0.010121677              | 0.014187913                            | 0.012356735           |
| 1.2.1.3b   | aldehyde dehydrogenase (NAD+)                              | Beta-Alanine              | 4.48662E-15          | -2.01223E-14      | -7.35677E-13        | -4.27925E-14      | 2.46089E-12                      | -6.92884E-11             | 7.40164E-11                            | 2.26702E-12           |
| 1.2.1.3c   | aldehyde dehydrogenase (NAD+)                              | Beta-Alanine              | 4.48662E-15          | -2.01223E-14      | -7.35677E-13        | -4.27925E-14      | 2.46089E-12                      | -6.92884E-11             | 7.40164E-11                            | 2.26702E-12           |
| 1.2.1.41   | glutamate-5-semialdehyde dehydrogenase                     | Arginine/Proline          | 1                    | 1                 | 1                   | 1                 | -4.996E-13                       | 9.20375E-12              | -2.79776E-12                           | 6.90559E-12           |
| 1.2.4.1    | pyruvate dehydrogenase (acetyl-transferring)               | Glycolysis                | 2.72596E-15          | 1.4128E-15        | -2.77919E-20        | 1.47864E-25       | 1.31316E-13                      | -2.7792E-18              | 2.72599E-13                            | 1.4128E-13            |
| 1.2.4.2    | oxoglutarate dehydrogenase (succinyl-transferring)         | TCA Cycle                 | 0.999150613          | 0.99905425        | 0.502036447         | 0.991035437       | 0.009636247                      | -48.899899               | 49.71141657                            | 0.801881324           |
| 1.2.4.4a   | 3-methyl-2-oxobutanoate dehydrogenase                      | Branched Amino Acid       | 0.948789313          | 0.981697664       | 1                   | 1                 | -3.290835128                     | 0                        | -5.121068701                           | -1.830233573          |
| 1.2.4.4b   | 3-methyl-2-oxobutanoate dehydrogenase                      | Branched Amino Acid       | 1                    | 1                 | 1                   | 1                 | 1.69864E-12                      | 0                        | -9.99201E-14                           | -1.79856E-12          |
| 1.2.4.4c   | 3-methyl-2-oxobutanoate dehydrogenase                      | Branched Amino Acid       | 1                    | 1                 | 0.89914251          | 0.996463615       | 3.9968E-13                       | -9.732110504             | 10.08574896                            | 0.353638453           |
| 1.3.1.26   | dihydrodipicolinate reductase                              | Lysine                    | 0                    | 0                 | 0                   | 0                 | 0                                | 0                        | 0                                      | 0                     |
| 1.3.1.9a   | enoyl-[acp] reductase (NADH)                               | Fatty Acid Synthesis      | -1.8753E-17          | -3.44621E-17      | 3.01758E-15         | -9.08772E-18      | 1.57091E-15                      | 3.02667E-13              | -3.03633E-13                           | -2.53743E-15          |
| 1.3.1.9b   | enoyl-[acp] reductase (NADH)                               | Fatty Acid Synthesis      | 0                    | 0                 | 0                   | 0                 | 0                                | 0                        | 0                                      | 0                     |
| 1.3.1.9c   | enoyl-[acp] reductase (NADH)                               | Fatty Acid Synthesis      | 0                    | 0                 | 0                   | 0                 | 0                                | 0                        | 0                                      | 0                     |
| 1.3.1.9d   | enoyl-[acp] reductase (NADH)                               | Fatty Acid Synthesis      | -1.8753E-17          | -3.44621E-17      | 3.01758E-15         | -9.08772E-18      | 1.57091E-15                      | 3.02667E-13              | -3.03633E-13                           | -2.53743E-15          |
| 1.3.1.9e   | enoyl-[acp] reductase (NADH)                               | Fatty Acid Synthesis      | -1.8753E-17          | -3.44621E-17      | 3.01758E-15         | -9.08772E-18      | 1.57091E-15                      | 3.02667E-13              | -3.03633E-13                           | -2.53743E-15          |
| 1.3.1.9f   | enoyl-[acp] reductase (NADH)                               | Fatty Acid Synthesis      | -1.8753E-17          | -3.44621E-17      | 3.01758E-15         | -9.08772E-18      | 1.57091E-15                      | 3.02667E-13              | -3.03633E-13                           | -2.53743E-15          |
| 1.3.1.9g   | enoyl-[acp] reductase (NADH)                               | Fatty Acid Synthesis      | 0                    | 0                 | 0                   | 0                 | 0                                | 0                        | 0                                      | 0                     |
| 1.3.1.9h   | enoyl-[acp] reductase (NADH)                               | Fatty Acid Synthesis      | -4.71186E-25         | -1.61003E-16      | 9.74717E-16         | 1.35057E-16       | 1.61003E-14                      | 8.3966E-14               | -9.74717E-14                           | -2.9606E-14           |
| 1.3.3.1    | dihydroorotate oxidase                                     | Pyrimidine                | -1.12084E-22         | -1.76455E-21      | -6.84211E-24        | 5.69964E-22       | 1.65246E-19                      | -5.76806E-20             | -1.05241E-20                           | -2.33451E-19          |
| 1.3.3.3    | coproporphyrinogen oxidase                                 | Porphyrin                 | 0                    | 0                 | 0                   | 0                 | 0                                | 0                        | 0                                      | 0                     |
| 1.3.3.4    | protoporphyrinogen oxidase                                 | Porphyrin                 | 0                    | 0                 | 0                   | 0                 | 0                                | 0                        | 0                                      | 0                     |
| 1.3.3.6    | acyl-CoA oxidase                                           | Beta Oxidation            | 1                    | 1                 | 1                   | 1                 | 1                                | 1.4988E-12               | -5.9952E-13                            | 8.99281E-13           |
| 1.3.5.1    | succinate dehydrogenase (ubiquinone)                       | TCA Cycle                 | 0.760384315          | 0.909046378       | 0.427025467         | 0.992667487       | -14.86620629                     | -56.56420202             | 33.3358848                             | -8.362110933          |
| 1.3.99.10  | isovaleryl-CoA dehydrogenase                               | Branched Amino Acid       | 1                    | 1                 | 1                   | 1                 | 1.69864E-12                      | 0                        | -9.99201E-14                           | -1.79856E-12          |

|            |                                                                     |                           |              |              |              |              |              |              |              |              |
|------------|---------------------------------------------------------------------|---------------------------|--------------|--------------|--------------|--------------|--------------|--------------|--------------|--------------|
| 1.3.99.2a  | butyryl-CoA dehydrogenase                                           | Branched Amino Acid       | 0.948789313  | 0.981697664  | 1            | 1            | -3.290835128 | 0            | -5.121068701 | -1.830233573 |
| 1.3.99.2b  | butyryl-CoA dehydrogenase                                           | Branched Amino Acid       | 1            | 1            | 0.89914251   | 0.996463615  | 3.9968E-13   | -9.732110504 | 10.08574896  | 0.353638453  |
| 1.4.1.1    | alanine dehydrogenase                                               | Glutamate/Glutamine       | 0            | 0            | 0            | 0            | 0            | 0            | 0            | 0            |
| 1.4.1.2    | glutamate dehydrogenase                                             | Glutamate/Glutamine       | 0.864449817  | 0.906324076  | 0.8683807    | 0.960327533  | -4.187425978 | -9.194683251 | -0.393088359 | -5.400345632 |
| 1.4.1.4    | glutamate dehydrogenase (NADP+)                                     | Glutamate/Glutamine       | 0.999448234  | 0.999156256  | 0.994367883  | 1            | 0.029197795  | -0.563211742 | 0.508035139  | -0.084374399 |
| 1.4.3.21   | primary-amine oxidase                                               | Beta-Alanine              | 4.48662E-15  | -2.01223E-14 | -7.35677E-13 | -4.27925E-14 | 2.46089E-12  | -6.92884E-11 | 7.40164E-11  | 2.26702E-12  |
| 1.4.4.2    | glycine dehydrogenase (decarboxylating)                             | Serine/Glycine            | 1            | 1            | 1            | 1            | 0            | 1.09912E-11  | -8.19345E-12 | 2.79776E-12  |
| 1.5.1.12a  | 1-pyrroline-5-carboxylate dehydrogenase                             | Arginine/Proline          | 0            | 0            | 0            | 0            | 0            | 0            | 0            | 0            |
| 1.5.1.12b  | 1-pyrroline-5-carboxylate dehydrogenase                             | Arginine/Proline          | 0.894815379  | 0.879726105  | 0.910636622  | 0.907551908  | 1.508927435  | 0.308471409  | -1.582124258 | -2.782580284 |
| 1.5.1.2    | pyrroline-5-carboxylate reductase                                   | Arginine/Proline          | 0            | 0            | 0            | 0            | 0            | 0            | 0            | 0            |
| 1.5.1.3a   | dihydrofolate reductase                                             | Folate                    | 1.86129E-13  | 6.86762E-14  | 2.16651E-13  | 1.03878E-15  | 1.17452E-11  | 2.15612E-11  | -3.0522E-12  | 6.76374E-12  |
| 1.5.1.3b   | dihydrofolate reductase                                             | Folate                    | 0.906581551  | 0.926728226  | 4.35651E-13  | 3.63175E-13  | -2.01466753  | 7.24769E-12  | 90.65815507  | 92.6728226   |
| 1.5.1.34   | 6,7-dihydropteridine reductase                                      | Bioppterin                | 1            | 1            | 1            | 1            | 0            | -1.09912E-12 | -6.99441E-13 | -1.79856E-12 |
| 1.5.3.13a  | N1-acetylpolyamine oxidase                                          | Polyamines                | 1            | 1            | 1            | 1            | 0            | 0            | 0            | 0            |
| 1.5.3.13b  | N1-acetylpolyamine oxidase                                          | Polyamines                | 4.48662E-15  | -2.01223E-14 | -7.35677E-13 | -4.27925E-14 | 2.46089E-12  | -6.92884E-11 | 7.40164E-11  | 2.26702E-12  |
| 1.5.5.1    | electron-transferring-flavoprotein dehydrogenase                    | Oxidative Phosphorylation | 0.897758154  | 0.947473008  | 0.89914251   | 0.996463615  | -4.97148536  | -9.732110504 | -0.138435611 | -4.899060755 |
| 1.5.99.6   | spermidine dehydrogenase                                            | Beta-Alanine              | 4.48662E-15  | -2.01223E-14 | -7.35677E-13 | -4.27925E-14 | 2.46089E-12  | -6.92884E-11 | 7.40164E-11  | 2.26702E-12  |
| 1.6.2.4    | NADPH-hemoprotein reductase                                         | Oxidative Phosphorylation | 0.869089507  | 0.677612809  | 0            | 0            | 19.14766981  | 0            | 86.9089507   | 67.7612809   |
| 1.6.5.3    | NADH dehydrogenase (ubiquinone)                                     | Oxidative Phosphorylation | 0            | 0            | 0            | 0            | 0            | 0            | 0            | 0            |
| 1.8.1.4a   | dihydrolipeoyl dehydrogenase                                        | Currency Exchange         | 2.72596E-15  | 1.4128E-15   | -2.77919E-20 | 1.47864E-25  | 1.31316E-13  | -2.7792E-18  | 2.72599E-13  | 1.4128E-13   |
| 1.8.1.4b   | dihydrolipeoyl dehydrogenase                                        | Currency Exchange         | 1.6705E-24   | 8.304E-13    | -2.45993E-27 | 2.18619E-12  | -8.304E-11   | -2.18619E-10 | 1.67296E-22  | -1.35579E-10 |
| 1.8.1.7    | glutathione-disulfide reductase                                     | Currency Exchange         | 1            | 1            | 1            | 1            | 0            | 0            | 0            | 0            |
| 1.8.1.9    | thioredoxin-disulfide reductase                                     | Currency Exchange         | -1.36307E-27 | 4.70842E-25  | 5.8043E-27   | 7.52105E-28  | -4.72205E-23 | 5.0522E-25   | -7.16737E-25 | 4.7009E-23   |
| 1.8.3.1    | sulfite oxidase                                                     | Sulfur                    | 1            | 1            | 1            | 1            | 0            | 0            | 0            | 0            |
| 1.8.4.9    | adenyllyl-sulfate reductase (glutathione)                           | Sulfur                    | 1            | 1            | 1            | 1            | 0            | 0            | 0            | 0            |
| 1.9.3.1    | cytochrome-c oxidase                                                | Oxidative Phosphorylation | 0            | 0            | 0            | 0            | 0            | 0            | 0            | 0            |
| 2.1.1.10   | homocysteine S-methyltransferase                                    | Cysteine/Methionine       | 1            | 1            | 1            | 1            | 5.9952E-13   | 6.79456E-12  | -1.9984E-12  | 4.19664E-12  |
| 2.1.1.45   | thymidylate synthase                                                | Pyrimidine                | 0            | -7.13833E-31 | -5.61836E-28 | -7.48722E-27 | 7.13833E-29  | 6.92539E-25  | 5.61836E-26  | 7.48651E-25  |
| 2.1.2.1    | glycine hydroxymethyltransferase                                    | Serine/Glycine            | 0            | 8.26888E-28  | 0            | 0            | -8.26888E-26 | 0            | 0            | 8.26888E-26  |
| 2.1.2.10   | aminomethyltransferase                                              | Serine/Glycine            | 1            | 1            | 1            | 1            | 0            | 1.09912E-11  | -8.19345E-12 | 2.79776E-12  |
| 2.1.2.11   | 3-methyl-2-oxobutanoate hydroxymethyltransferase                    | CoA Synthesis             | 4.48662E-15  | -2.01223E-14 | -7.35677E-13 | -4.27925E-14 | 2.46089E-12  | -6.92884E-11 | 7.40164E-11  | 2.26702E-12  |
| 2.1.3.2    | aspartate carbamoyltransferase                                      | Pyrimidine                | -1.12084E-22 | -1.76455E-21 | -6.84211E-24 | 5.69964E-22  | 1.65246E-19  | -5.76806E-20 | -1.05241E-20 | -2.33451E-19 |
| 2.1.3.3    | ornithine carbamoyltransferase                                      | Arginine/Proline          | 0.972219727  | 0.967916414  | 0.975155086  | 0.970208936  | 0.430331239  | 0.494614976  | -0.293535925 | -0.229252188 |
| 2.2.1.1a   | transketolase                                                       | Pentose Phosphate         | 0.850237067  | 0.645396232  | 0            | 0            | 20.48408356  | 0            | 85.02370672  | 64.53962316  |
| 2.2.1.1b   | transketolase                                                       | Pentose Phosphate         | 0.850237067  | 0.645396232  | 0            | 0            | 20.48408356  | 0            | 85.02370672  | 64.53962316  |
| 2.2.1.2    | transaldolase                                                       | Glycolysis                | 0.850237067  | 0.645396232  | 0            | 0            | 20.48408356  | 0            | 85.02370672  | 64.53962316  |
| 2.2.1.7    | 1-deoxy-D-xylulose-5-phosphate synthase                             | Terpenoid Backbone        | 0            | 0            | 0            | 0            | 0            | 0            | 0            | 0            |
| 2.3.1.117  | 2,3,4,5-tetrahydroxyproline-2,6-dicarboxylate N-succinyltransferase | Lysine                    | 0            | 0            | 0            | 0            | 0            | 0            | 0            | 0            |
| 2.3.1.12   | dihydrolipeoyllysine-residue acetyltransferase                      | Glycolysis                | 2.72596E-15  | 1.4128E-15   | -2.77919E-20 | 1.47864E-25  | 1.31316E-13  | -2.7792E-18  | 2.72599E-13  | 1.4128E-13   |
| 2.3.1.15   | glycerol-3-phosphate O-acyltransferase                              | Phospholipid              | -1.79849E-28 | 3.46964E-16  | 1.83656E-22  | -3.27301E-12 | -3.46964E-14 | 3.27301E-10  | -1.83656E-20 | 3.27336E-10  |
| 2.3.1.16a  | acetyl-CoA C-acyltransferase                                        | Branched Amino Acid       | 1            | 1            | 0.89914251   | 0.996463615  | 3.9968E-13   | -9.732110504 | 10.08574896  | 0.353638453  |
| 2.3.1.16b  | Acetyl-CoA C-acyltransferase                                        | Beta Oxidation            | 1            | 1            | 1            | 1            | 0            | 1.4988E-12   | -5.9952E-13  | 8.99281E-13  |
| 2.3.1.168a | dihydrolipeoyllysine-residue (2-methylpropanoyl)transferase         | Branched Amino Acid       | 0.948789313  | 0.981697664  | 1            | 1            | -3.290835128 | 0            | -5.121068701 | -1.830233573 |
| 2.3.1.168b | dihydrolipeoyllysine-residue (2-methylpropanoyl)transferase         | Branched Amino Acid       | 1            | 1            | 0.89914251   | 0.996463615  | 3.9968E-13   | -9.732110504 | 10.08574896  | 0.353638453  |
| 2.3.1.168c | dihydrolipeoyllysine-residue (2-methylpropanoyl)transferase         | Branched Amino Acid       | 1            | 1            | 1            | 1            | 1.69864E-12  | 0            | -9.99201E-14 | -1.79856E-12 |
| 2.3.1.180  | beta-ketoacyl-acyl-carrier-protein synthase III                     | Fatty Acid Synthesis      | 0            | 0            | 0            | 0            | 0            | 0            | 0            | 0            |
| 2.3.1.24   | sphingosine N-acyltransferase                                       | Phospholipid              | 0            | 0            | 0            | 0            | 0            | 0            | 0            | 0            |
| 2.3.1.31   | homoserine O-acetyltransferase                                      | Cysteine/Methionine       | 1            | 1            | 1            | 1            | 0            | 0            | 0            | 0            |
| 2.3.1.37   | 5-aminolevulinatase synthase                                        | Porphyrin                 | 0            | 0            | 0            | 0            | 0            | 0            | 0            | 0            |
| 2.3.1.39   | [acp] S-malonyltransferase                                          | Fatty Acid Synthesis      | 0            | 0            | 0            | 0            | 0            | 0            | 0            | 0            |
| 2.3.1.4    | glucosamine-phosphate N-acetyltransferase                           | Amino Sugar               | 0            | 0            | 0            | 0            | 0            | 0            | 0            | 0            |
| 2.3.1.41a  | beta-ketoacyl-acyl-carrier-protein synthase I                       | Fatty Acid Synthesis      | -1.8753E-17  | -3.44621E-17 | 3.01758E-15  | -9.08772E-18 | 1.57091E-15  | 3.02667E-13  | -3.03633E-13 | -2.53743E-15 |
| 2.3.1.41b  | beta-ketoacyl-acyl-carrier-protein synthase I                       | Fatty Acid Synthesis      | 0            | 0            | 0            | 0            | 0            | 0            | 0            | 0            |
| 2.3.1.41c  | beta-ketoacyl-acyl-carrier-protein synthase I                       | Fatty Acid Synthesis      | 0            | 0            | 0            | 0            | 0            | 0            | 0            | 0            |
| 2.3.1.41d  | beta-ketoacyl-acyl-carrier-protein synthase I                       | Fatty Acid Synthesis      | -1.8753E-17  | -3.44621E-17 | 3.01758E-15  | -9.08772E-18 | 1.57091E-15  | 3.02667E-13  | -3.03633E-13 | -2.53743E-15 |
| 2.3.1.41e  | beta-ketoacyl-acyl-carrier-protein synthase I                       | Fatty Acid Synthesis      | -1.8753E-17  | -3.44621E-17 | 3.01758E-15  | -9.08772E-18 | 1.57091E-15  | 3.02667E-13  | -3.03633E-13 | -2.53743E-15 |
| 2.3.1.41f  | beta-ketoacyl-acyl-carrier-protein synthase I                       | Fatty Acid Synthesis      | -1.8753E-17  | -3.44621E-17 | 3.01758E-15  | -9.08772E-18 | 1.57091E-15  | 3.02667E-13  | -3.03633E-13 | -2.53743E-15 |
| 2.3.1.41g  | beta-ketoacyl-acyl-carrier-protein synthase I                       | Fatty Acid Synthesis      | -4.71186E-25 | -1.61003E-16 | 9.74717E-16  | 1.35057E-16  | 1.61003E-14  | 8.3966E-14   | -9.74717E-14 | -2.9606E-14  |
| 2.3.1.50   | serine C-palmitoyltransferase                                       | Phospholipid              | 0            | 0            | 0            | 0            | 0            | 0            | 0            | 0            |
| 2.3.1.51   | 1-acylglycerol-3-phosphate O-acyltransferase                        | Phospholipid              | -1.79849E-28 | 3.46964E-16  | 1.83656E-22  | -3.27301E-12 | -3.46964E-14 | 3.27301E-10  | -1.83656E-20 | 3.27336E-10  |
| 2.3.1.57a  | diamine N-acetyltransferase                                         | Polyamines                | 4.48662E-15  | -2.01223E-14 | -7.35677E-13 | -4.27925E-14 | 2.46089E-12  | -6.92884E-11 | 7.40164E-11  | 2.26702E-12  |
| 2.3.1.57b  | diamine N-acetyltransferase                                         | Polyamines                | 1            | 1            | 1            | 1            | 0            | 0            | 0            | 0            |
| 2.3.1.57c  | diamine N-acetyltransferase                                         | Polyamines                | 1            | 1            | 1            | 1            | 0            | 0            | 0            | 0            |
| 2.3.1.61   | dihydrolipeoyllysine-residue succinyltransferase                    | TCA Cycle                 | 0.999150613  | 0.99905425   | 0.502036447  | 0.991035437  | 0.009636247  | -48.899899   | 49.71141657  | 0.801881324  |
| 2.3.1.8    | phosphate acetyltransferase                                         | Misc                      | 0.999640005  | 1            | 0.999498126  | 1            | -0.035999496 | -0.050187409 | 0.014187913  | 6.09512E-12  |
| 2.3.1.85   | fatty acid synthase I                                               | Fatty Acid Synthesis      | 7.14357E-17  | 3.1732E-17   | -2.83989E-18 | 7.8356E-16   | 3.97037E-15  | -7.864E-14   | 7.42756E-15  | -7.51828E-14 |
| 2.3.1.9    | acetyl-CoA C-acyltransferase                                        | Beta Oxidation            | 1            | 1            | 1            | 1            | 1.69864E-12  | 0            | -9.99201E-14 | -1.79856E-12 |
| 2.3.3.1    | citrate (Si)-synthase                                               | TCA Cycle                 | 1            | 1            | 0.427025467  | 0.992667487  | -3.9968E-13  | -56.56420202 | 57.29745332  | 0.733251305  |
| 2.3.3.5    | 2-methylcitrate synthase                                            | MC Cycle                  | 0.912306258  | 0.981502922  | 0.89914251   | 0.996463615  | -6.919666435 | -9.732110504 | 1.316374729  | -1.49606934  |

|           |                                                           |                     |              |              |              |              |              |              |              |              |
|-----------|-----------------------------------------------------------|---------------------|--------------|--------------|--------------|--------------|--------------|--------------|--------------|--------------|
| 2.3.3.8   | ATP citrate synthase                                      | TCA Cycle           | 2.3982E-28   | -3.29691E-28 | 3.06965E-28  | -2.62074E-26 | 5.69511E-26  | 2.65143E-24  | -6.71453E-27 | 2.58777E-24  |
| 2.4.1.198 | phosphatidylinositol N-acetylglucosaminyltransferase      | Phospholipid        | 1            | 1            | 1            | 1            | 0            | 0            | 0            | 0            |
| 2.4.1.83  | dolichyl-phosphate beta-D-mannosyltransferase             | Amino Sugar         | 1            | 1            | 1            | 1            | 0            | 0            | 0            | 0            |
| 2.4.2.1a  | purine-nucleoside phosphorylase                           | Purine              | 1            | 1            | 1            | 1            | -9.99201E-13 | 1.12022E-11  | -4.996E-12   | 7.20535E-12  |
| 2.4.2.1b  | purine-nucleoside phosphorylase                           | Purine              | 1            | 1            | 1            | 1            | 1.9984E-13   | 4.89608E-12  | -2.29816E-12 | 2.39808E-12  |
| 2.4.2.1c  | purine-nucleoside phosphorylase                           | Purine              | 1            | 1            | 1            | 1            | 0            | 1.21902E-11  | -6.99441E-12 | 5.19584E-12  |
| 2.4.2.1d  | purine-nucleoside phosphorylase                           | Purine              | 1            | 1            | 1            | 1            | -8.99281E-13 | 6.19504E-12  | -6.39488E-12 | 6.99441E-13  |
| 2.4.2.1e  | purine-nucleoside phosphorylase                           | Purine              | 1            | 1            | 1            | 1            | 0            | 6.99441E-12  | -7.99361E-12 | -9.99201E-13 |
| 2.4.2.1f  | purine-nucleoside phosphorylase                           | Nicotinate          | 1            | 1            | 1            | 1            | -1.9984E-12  | 1.45883E-11  | -1.09912E-11 | 5.59552E-12  |
| 2.4.2.1g  | purine-nucleoside phosphorylase                           | Nicotinate          | 1            | 1            | 1            | 1            | -6.99441E-13 | 6.4948E-12   | -4.09672E-12 | 3.09752E-12  |
| 2.4.2.1h  | purine-nucleoside phosphorylase                           | Pyrimidine          | 1            | 1            | 1            | 1            | -2.9976E-13  | 1.0103E-11   | -3.29736E-12 | 7.10543E-12  |
| 2.4.2.1i  | purine-nucleoside phosphorylase                           | Purine              | 1            | 1            | 1            | 1            | 2.9976E-13   | 4.09672E-12  | -3.39728E-12 | 3.9968E-13   |
| 2.4.2.1j  | purine-nucleoside phosphorylase                           | Purine              | 1            | 1            | 1            | 1            | 9.99201E-13  | 1.03917E-11  | -4.996E-12   | 4.39648E-12  |
| 2.4.2.10  | orotate phosphoribosyltransferase                         | Pyrimidine          | -1.12084E-22 | -1.76455E-21 | -6.84211E-24 | 5.69964E-22  | 1.65246E-19  | -5.76806E-20 | -1.05241E-20 | -2.33451E-19 |
| 2.4.2.11  | nicotinate phosphoribosyltransferase                      | Nicotinate          | 1            | 1            | 1            | 1            | -1.09912E-12 | 1.13909E-11  | -6.39488E-12 | 6.09512E-12  |
| 2.4.2.8a  | hypoxanthine phosphoribosyltransferase                    | Purine              | 1            | 1            | 1            | 1            | -1.09912E-12 | 1.18017E-11  | -4.09672E-12 | 8.80407E-12  |
| 2.4.2.8b  | hypoxanthine phosphoribosyltransferase                    | Purine              | 1            | 1            | 1            | 1            | -9.99201E-13 | 9.29257E-12  | -7.09433E-12 | 3.19744E-12  |
| 2.4.2.8c  | hypoxanthine phosphoribosyltransferase                    | Purine              | 1            | 1            | 1            | 1            | -1.19904E-12 | 6.39488E-12  | -4.19664E-12 | 3.39728E-12  |
| 2.4.2.8d  | hypoxanthine phosphoribosyltransferase                    | Purine              | 1            | 1            | 1            | 1            | -8.99281E-13 | 6.19504E-12  | -6.39488E-12 | 6.99441E-13  |
| 2.4.2.9   | uracil phosphoribosyltransferase                          | Pyrimidine          | 1            | 1            | 1            | 1            | -9.99201E-14 | 1.0103E-11   | -3.29736E-12 | 6.90559E-12  |
| 2.5.1.1   | dimethylallyltransferase                                  | Terpenoid Backbone  | 0            | 0            | 0            | 0            | 0            | 0            | 0            | 0            |
| 2.5.1.10  | geranyltransferase                                        | Terpenoid Backbone  | 0            | 0            | 0            | 0            | 0            | 0            | 0            | 0            |
| 2.5.1.15a | dihydropteroate synthase                                  | Folate              | 1            | 1            | 1            | 1            | 9.99201E-14  | 0            | -1.9984E-13  | -2.9976E-13  |
| 2.5.1.15b | dihydropteroate synthase                                  | Folate              | 1            | 1            | 1            | 1            | 9.99201E-14  | 0            | 0            | -9.99201E-14 |
| 2.5.1.19  | 3-phosphoshikimate 1-carboxyvinyltransferase              | Shikimate           | 1            | 1            | 1            | 1            | -1.9984E-13  | 0            | -3.9968E-13  | -1.9984E-13  |
| 2.5.1.29  | farnesyltransferase                                       | Terpenoid Backbone  | 0            | 0            | 0            | 0            | 0            | 0            | 0            | 0            |
| 2.5.1.31a | di-trans,poly-cis-decaprenylcistransferase                | Terpenoid Backbone  | 0            | 0            | 0            | 0            | 0            | 0            | 0            | 0            |
| 2.5.1.31b | di-trans,poly-cis-decaprenylcistransferase                | Terpenoid Backbone  | 0            | 0            | 0            | 0            | 0            | 0            | 0            | 0            |
| 2.5.1.54  | 3-deoxy-7-phosphoheptulonate synthase                     | Shikimate           | 1            | 1            | 1            | 1            | -1.9984E-13  | 0            | -3.9968E-13  | -1.9984E-13  |
| 2.5.1.6   | methionine adenosyltransferase                            | Cysteine/Methionine | 1            | 1            | 1            | 1            | 5.9952E-13   | 6.79456E-12  | -1.9984E-12  | 4.19664E-12  |
| 2.5.1.61  | hydroxymethylbilane synthase                              | Porphyrin           | 0            | 0            | 0            | 0            | 0            | 0            | 0            | 0            |
| 2.6.99.2  | pyridoxal 5-phosphate synthase                            | Misc                | 0            | 0            | 0            | 0            | 0            | 0            | 0            | 0            |
| 2.6.1.1a  | aspartate transaminase                                    | Glutamate/Glutamine | 4.1122E-28   | -2.35636E-28 | 0            | 0            | 6.46856E-26  | 0            | 4.1122E-26   | -2.35636E-26 |
| 2.6.1.1b  | aspartate transaminase                                    | Cysteine/Methionine | 1            | 1            | 1            | 1            | 0            | 0            | 0            | 0            |
| 2.6.1.13  | ornithine aminotransferase                                | Arginine/Proline    | 0.894815379  | 0.879726105  | 0.910636622  | 0.907551908  | 1.508927435  | 0.308471409  | -1.582124258 | -2.782580284 |
| 2.6.1.16  | glutamine-fructose-6-phosphate transaminase (isomerizing) | Amino Sugar         | 0            | 0            | 0            | 0            | 0            | 0            | 0            | 0            |
| 2.6.1.17  | succinyldiaminopimelate transaminase                      | Lysine              | 0            | 0            | 0            | 0            | 0            | 0            | 0            | 0            |
| 2.6.1.42a | branched-chain-amino-acid transaminase                    | Branched Amino Acid | 1            | 1            | 1            | 1            | 1.69864E-12  | 0            | -9.99201E-14 | -1.79856E-12 |
| 2.6.1.42b | branched-chain-amino-acid transaminase                    | Branched Amino Acid | 7.24182E-14  | -7.01904E-14 | -7.35677E-13 | -4.27925E-14 | 1.42609E-11  | -6.92884E-11 | 8.08095E-11  | -2.73979E-12 |
| 2.6.1.42c | branched-chain-amino-acid transaminase                    | Branched Amino Acid | 1            | 1            | 0.89914251   | 0.996463615  | 3.9968E-13   | -9.732110504 | 10.08574896  | 0.353638453  |
| 2.6.1.52  | phosphoserine transaminase                                | Serine/Glycine      | 0.976866879  | 0.965043468  | 1            | 1            | 1.182341086  | 9.99201E-13  | -2.313312098 | -3.495653184 |
| 2.6.1.85  | aminodeoxychorismate synthase                             | Folate              | 1            | 1            | 1            | 1            | -1.9984E-13  | 0            | -3.9968E-13  | -1.9984E-13  |
| 2.7.1.1a  | hexokinase                                                | Glycolysis          | 1            | 5.64243E-17  | 1            | 0            | 100          | 100          | 0            | 5.64243E-15  |
| 2.7.1.107 | diacylglycerol kinase                                     | Phospholipid        | 1            | 1            | 1            | 1            | -2.9976E-13  | 5.59552E-12  | -1.39888E-12 | 4.4964E-12   |
| 2.7.1.137 | phosphatidylinositol 3-kinase                             | Phospholipid        | 1            | 1            | 1            | 1            | 0            | 0            | 0            | 0            |
| 2.7.1.148 | 4-(cytidine 5'-diphospho)-2-C-methyl-D-erythritol kinase  | Terpenoid Backbone  | 0            | 0            | 0            | 0            | 0            | 0            | 0            | 0            |
| 2.7.1.15a | ribokinase                                                | Pentose Phosphate   | 1            | 1            | 1            | 1            | 0            | 0            | 0            | 0            |
| 2.7.1.15b | ribokinase                                                | Pentose Phosphate   | 1            | 1            | 1            | 1            | 0            | 0            | 0            | 0            |
| 2.7.1.20  | adenosine kinase                                          | Purine              | 0.994618602  | 0.997468073  | 0.994522118  | 0.997794033  | -0.284947066 | -0.327191532 | 0.009648411  | -0.032596055 |
| 2.7.1.23  | NAD+ kinase                                               | Nicotinate          | 1            | 1            | 1            | 1            | -3.9968E-13  | 7.39409E-12  | -6.59472E-12 | 1.19904E-12  |
| 2.7.1.24  | dephospho-CoA kinase                                      | CoA Synthase        | 4.48662E-15  | -2.01223E-14 | -7.35677E-13 | -4.27925E-14 | 2.46089E-12  | -6.92884E-11 | 7.40164E-11  | 2.26702E-12  |
| 2.7.1.25  | adenylyl-sulfate kinase                                   | Sulfur              | 1            | 1            | 1            | 1            | 0            | 0            | 0            | 0            |
| 2.7.1.32  | choline kinase                                            | Phospholipid        | 0            | 0            | 0            | 0            | 0            | 0            | 0            | 0            |
| 2.7.1.33  | pantothenate kinase                                       | CoA Synthase        | 4.48662E-15  | -2.01223E-14 | -7.35677E-13 | -4.27925E-14 | 2.46089E-12  | -6.92884E-11 | 7.40164E-11  | 2.26702E-12  |
| 2.7.1.39  | homoserine kinase                                         | Serine/Glycine      | 1            | 1            | 1            | 1            | 0            | 0            | 0            | 0            |
| 2.7.1.40a | pyruvate kinase                                           | Glycolysis          | 0.670137833  | 0.456466454  | 0.900813799  | 0.733913126  | 21.36713785  | 16.69006728  | -23.06759655 | -27.74466712 |
| 2.7.1.40b | pyruvate kinase                                           | Glycolysis          | 0            | 0            | 0            | 0            | 0            | 0            | 0            | 0            |
| 2.7.1.67  | 1-phosphatidylinositol 4-kinase                           | Phospholipid        | 1            | 1            | 1            | 1            | 0            | 0            | 0            | 0            |
| 2.7.1.68  | 1-phosphatidylinositol-4-phosphate 5-kinase               | Phospholipid        | 1            | 1            | 1            | 1            | 0            | 0            | 0            | 0            |
| 2.7.1.71  | shikimate kinase                                          | Shikimate           | 1            | 1            | 1            | 1            | -1.9984E-13  | 0            | -3.9968E-13  | -1.9984E-13  |
| 2.7.1.90  | diphosphate-fructose-6-phosphate 1-phosphotransferase     | Glycolysis          | 0.79556231   | 0.531160757  | 0.609323085  | 0.452122084  | 26.4401553   | 15.72010011  | 18.62392249  | 7.903867299  |
| 2.7.2.11  | glutamate 5-kinase                                        | Arginine/Proline    | 1            | 1            | 1            | 1            | -4.996E-13   | 9.20375E-12  | -2.79776E-12 | 6.90559E-12  |
| 2.7.2.2   | carbamate kinase                                          | Pyrimidine          | 0.972876419  | 0.968686792  | 0.975809627  | 0.970890264  | 0.41896268   | 0.491936312  | -0.293320795 | -0.220347163 |
| 2.7.2.3a  | phosphoglycerate kinase                                   | Glycolysis          | 1            | 0.722669781  | 1            | 1            | 27.73302188  | 7.99361E-12  | -6.39488E-12 | -27.73302188 |
| 2.7.2.3b  | phosphoglycerate kinase                                   | Glycolysis          | 1            | 1            | 1            | 1            | 3.9968E-13   | 6.19504E-12  | -3.9968E-12  | 1.79856E-12  |
| 2.7.2.4   | aspartate kinase                                          | Lysine              | 0            | 0            | 0            | 0            | 0            | 0            | 0            | 0            |
| 2.7.4.14a | cytidylate kinase                                         | Pyrimidine          | 0.993880493  | 0.992764142  | -2.48128E-15 | -3.83112E-15 | 0.111635046  | 1.34984E-13  | 99.38804928  | 99.27641424  |
| 2.7.4.14b | cytidylate kinase                                         | Pyrimidine          | 0.999955332  | 0.999947124  | 0.999956321  | 0.999953365  | 0.000820753  | 0.000295562  | -9.89011E-05 | -0.000624092 |
| 2.7.4.14c | cytidylate kinase                                         | Pyrimidine          | 1.6114E-25   | 4.96196E-25  | 7.29802E-21  | 7.11182E-27  | -3.35056E-23 | 7.29801E-19  | -7.29786E-19 | 4.89084E-23  |

|           |                                                                    |                      |              |              |              |              |              |              |              |              |
|-----------|--------------------------------------------------------------------|----------------------|--------------|--------------|--------------|--------------|--------------|--------------|--------------|--------------|
| 2.7.4.3a  | adenylate kinase                                                   | Purine               | -2.78012E-13 | -1.47936E-14 | -3.23602E-12 | 3.24461E-13  | -2.63218E-11 | -3.56048E-10 | 2.958E-10    | -3.39255E-11 |
| 2.7.4.3b  | adenylate kinase                                                   | Purine               | 1            | 1            | 1            | 1            | 0            | 8.59313E-12  | -5.29576E-12 | 3.29736E-12  |
| 2.7.4.6a  | nucleoside-diphosphate kinase                                      | Pyrimidine           | 0            | 0            | 0            | 0            | 0            | 0            | 0            | 0            |
| 2.7.4.6b  | nucleoside-diphosphate kinase                                      | Purine               | 0            | 0            | 0            | 0            | 0            | 0            | 0            | 0            |
| 2.7.4.6c  | nucleoside-diphosphate kinase                                      | Pyrimidine           | 0.994005181  | 0.992911415  | -1.71564E-27 | 1.11926E-23  | 0.109376639  | -1.11943E-21 | 99.40051814  | 99.2911415   |
| 2.7.4.6d  | nucleoside-diphosphate kinase                                      | Purine               | 1            | 1            | 1            | 1            | -4.996E-13   | 3.69704E-12  | -2.498E-12   | 1.69864E-12  |
| 2.7.4.6e  | nucleoside-diphosphate kinase                                      | Pyrimidine           | 0            | 0            | 0            | 0            | 0            | 0            | 0            | 0            |
| 2.7.4.6f  | nucleoside-diphosphate kinase                                      | Purine               | 0            | 0            | 0            | 0            | 0            | 0            | 0            | 0            |
| 2.7.4.6g  | nucleoside-diphosphate kinase                                      | Pyrimidine           | 0            | 0            | 0            | 0            | 0            | 0            | 0            | 0            |
| 2.7.4.6h  | nucleoside-diphosphate kinase                                      | Pyrimidine           | 0            | 0            | 0            | 0            | 0            | 0            | 0            | 0            |
| 2.7.4.6i  | nucleoside-diphosphate kinase                                      | Pyrimidine           | 1            | 1            | 1            | 1            | -3.9968E-13  | 6.99441E-12  | -3.39728E-12 | 3.9968E-12   |
| 2.7.4.8a  | guanylate kinase                                                   | Purine               | -7.00644E-20 | -9.27747E-22 | 7.08152E-23  | -2.92078E-20 | -6.91367E-18 | 2.92786E-18  | -7.01352E-18 | 2.828E-18    |
| 2.7.4.8b  | guanylate kinase                                                   | Purine               | 1            | 1            | 1            | 1            | 0            | 6.99441E-12  | -7.99361E-12 | -9.99201E-13 |
| 2.7.4.9a  | dTMP kinase                                                        | Pyrimidine           | 0            | -2.96039E-29 | 9.58867E-26  | 0            | 2.96039E-27  | 9.58867E-24  | -9.58867E-24 | -2.96039E-27 |
| 2.7.4.9b  | dTMP kinase                                                        | Pyrimidine           | 1            | 1            | 1            | 1            | -9.99201E-14 | 6.09512E-12  | -3.79696E-12 | 2.39808E-12  |
| 2.7.6.1   | ribose-phosphate diphosphokinase                                   | Pentose Phosphate    | -3.21357E-25 | 3.26838E-15  | 1.34431E-23  | -3.46028E-15 | -3.26838E-13 | 3.46028E-13  | -1.37644E-21 | 6.72866E-13  |
| 2.7.6.3   | 2-amino-4-hydroxy-6-hydroxymethylidihydropteridine diphosphokinase | Folate               | 1            | 1            | 1            | 1            | 9.99201E-14  | 0            | -1.9984E-13  | -2.9976E-13  |
| 2.7.7.13  | mannose-1-phosphate guanylyltransferase                            | Misc                 | 0            | 0            | 0            | 0            | 0            | 0            | 0            | 0            |
| 2.7.7.15  | choline-phosphate cytidylyltransferase                             | Phospholipid         | 0            | 0            | 0            | 0            | 0            | 0            | 0            | 0            |
| 2.7.7.18  | Nicotinate-nucleotide adenyllyltransferase                         | Nicotinate           | 1            | 1            | 1            | 1            | -3.9968E-13  | 8.49321E-12  | -5.19584E-12 | 3.69704E-12  |
| 2.7.7.23  | UDP-N-acetylglucosamine diphosphorylase                            | Amino Sugar          | 0            | 0            | 0            | 0            | 0            | 0            | 0            | 0            |
| 2.7.7.27  | glucose-1-phosphate adenyllyltransferase                           | Misc                 | 0            | 0            | 0            | 0            | 0            | 0            | 0            | 0            |
| 2.7.7.3   | panthetheine-phosphate adenyllyltransferase                        | CoA Synthesis        | 4.48662E-15  | -2.01223E-14 | -7.35677E-13 | -4.27925E-14 | 2.46089E-12  | -6.92884E-11 | 7.40164E-11  | 2.26702E-12  |
| 2.7.7.4   | sulfate adenyllyltransferase                                       | Sulfur               | 1            | 1            | 1            | 1            | 0            | 0            | 0            | 0            |
| 2.7.7.41  | phosphatidate cytidylyltransferase                                 | Phospholipid         | 0            | 0            | 0            | 0            | 0            | 0            | 0            | 0            |
| 2.7.7.60  | 2-C-methyl-D-erythritol 4-phosphate cytidylyltransferase           | Terpenoid Backbone   | 0            | 0            | 0            | 0            | 0            | 0            | 0            | 0            |
| 2.7.8.11  | CDP-diacylglycerol-inositol 3-phosphatidyltransferase              | Phospholipid         | 0            | 0            | 0            | 0            | 0            | 0            | 0            | 0            |
| 2.7.8.15  | UDP-N-acetylglucosamine-dolichyl-phosphate                         | Amino Sugar          | 1            | 1            | 1            | 1            | 0            | 0            | 0            | 0            |
| 2.7.8.2   | diacylglycerol cholinephosphotransferase                           | Phospholipid         | 0            | 0            | 0            | 0            | 0            | 0            | 0            | 0            |
| 2.7.8.27  | sphingomyelin synthase                                             | Phospholipid         | 0            | 0            | 0            | 0            | 0            | 0            | 0            | 0            |
| 2.7.8.5   | CDP-diacylglycerol-glycerol-3-phosphate 3-phosphatidyltransferase  | Phospholipid         | 1            | 1            | 1            | 1            | 0            | 0            | 0            | 0            |
| 2.7.8.8   | CDP-diacylglycerol-serine O-phosphatidyltransferase                | Phospholipid         | 0            | 0            | 0            | 0            | 0            | 0            | 0            | 0            |
| 2.8.3.8   | acetate CoA-transferase                                            | Misc                 | 1            | 1            | 1            | 1            | 0            | 0            | 0            | 0            |
| 3.1.1.31  | 6-phosphogluconolactonase                                          | Pentose Phosphate    | 0.849895296  | 0.644766931  | 0            | 0            | 20.51283654  | 0            | 84.9895296   | 64.47669307  |
| 3.1.1.32  | phospholipase A1                                                   | Phospholipid         | 1            | 1            | 1            | 1            | -1.29896E-12 | 0            | -1.79856E-12 | -4.996E-13   |
| 3.1.1.4   | phospholipase A2                                                   | Phospholipid         | 1            | 1            | 1            | 1            | 0            | 7.29417E-12  | -2.19824E-12 | 5.09592E-12  |
| 3.1.1.5a  | lysophospholipase                                                  | Phospholipid         | 1            | 1            | 1            | 1            | 0            | 7.29417E-12  | -2.19824E-12 | 5.09592E-12  |
| 3.1.1.5b  | lysophospholipase                                                  | Phospholipid         | 1            | 1            | 1            | 1            | -1.29896E-12 | 0            | -1.79856E-12 | -4.996E-13   |
| 3.1.2.14a | oleoyl-[acyl-carrier-protein] hydrolase                            | Fatty Acid Synthesis | 3.17433E-27  | -2.93242E-16 | 3.84044E-16  | 6.54513E-17  | 2.93242E-14  | 3.18593E-14  | -3.84044E-14 | -3.58693E-14 |
| 3.1.2.14b | oleoyl-[acyl-carrier-protein] hydrolase                            | Fatty Acid Synthesis | 1            | 1            | 1            | 1            | -5.9952E-13  | 3.19744E-12  | -3.79696E-12 | 0            |
| 3.1.2.14c | oleoyl-[acyl-carrier-protein] hydrolase                            | Fatty Acid Synthesis | -4.71186E-25 | -1.61003E-16 | 9.74717E-16  | 1.35057E-16  | 1.61003E-14  | 8.3966E-14   | -9.74717E-14 | -2.9606E-14  |
| 3.1.2.14d | oleoyl-[acyl-carrier-protein] hydrolase                            | Fatty Acid Synthesis | -4.71186E-25 | -1.61003E-16 | 9.74717E-16  | 1.35057E-16  | 1.61003E-14  | 8.3966E-14   | -9.74717E-14 | -2.9606E-14  |
| 3.1.2.14e | oleoyl-[acyl-carrier-protein] hydrolase                            | Fatty Acid Synthesis | -4.71186E-25 | -1.61003E-16 | 9.74717E-16  | 1.35057E-16  | 1.61003E-14  | 8.3966E-14   | -9.74717E-14 | -2.9606E-14  |
| 3.1.2.2   | palmitoyl-CoA hydrolase                                            | Fatty Acid Synthesis | 1            | 1            | 1            | 1            | -9.99201E-13 | 7.99361E-12  | -4.996E-12   | 3.9968E-12   |
| 3.1.2.4   | 3-hydroxyisobutyryl-CoA hydrolase                                  | Branched Amino Acid  | 0.948789313  | 0.981697664  | 1            | 1            | -3.290835128 | 0            | -5.121068701 | -1.830233573 |
| 3.1.2.6   | hydroxyacylglutathione hydrolase                                   | Misc                 | 1            | 1            | 1            | 1            | 0            | 0            | 0            | 0            |
| 3.1.3.11  | fructose-bisphosphatase                                            | Glycolysis           | 1            | 1            | 1            | 1            | -2.9976E-13  | 1.21014E-11  | -5.4956E-12  | 6.90559E-12  |
| 3.1.3.25  | inositol-phosphate phosphatase                                     | Phospholipid         | 0            | 0            | 0            | 0            | 0            | 0            | 0            | 0            |
| 3.1.3.3   | phosphoserine phosphatase                                          | Serine/Glycine       | 0.976866879  | 0.965043468  | 1            | 1            | 1.182341086  | 9.99201E-13  | -2.313312098 | -3.495653184 |
| 3.1.3.37  | sedoheptulose-bisphosphatase                                       | Glycolysis           | 1            | 1            | 1            | 1            | 0            | 4.39648E-12  | -3.69704E-12 | 6.99441E-13  |
| 3.1.3.4   | phosphatidate phosphatase                                          | Phospholipid         | 1.64372E-25  | 3.31021E-28  | 4.377E-29    | -5.1165E-28  | 1.64041E-23  | 5.5542E-26   | 1.64329E-23  | 8.42671E-26  |
| 3.1.3.5a  | 5'-nucleotidase                                                    | Purine               | 1            | 1            | 1            | 1            | 0            | 0            | 0            | 0            |
| 3.1.3.5b  | 5'-nucleotidase                                                    | Pyrimidine           | 1            | 1            | 1            | 1            | -4.996E-13   | 0            | -7.99361E-13 | -2.9976E-13  |
| 3.1.3.5c  | 5'-nucleotidase                                                    | Pyrimidine           | 1            | 1            | 1            | 1            | -9.99201E-14 | 0            | -4.996E-13   | -3.9968E-13  |
| 3.1.3.5d  | 5'-nucleotidase                                                    | Purine               | 1            | 1            | 1            | 1            | 1.9984E-13   | 7.39409E-12  | -3.29736E-12 | 3.89688E-12  |
| 3.1.3.5e  | 5'-nucleotidase                                                    | Purine               | 1            | 1            | 1            | 1            | 0            | 1.21902E-11  | -6.99441E-12 | 5.19584E-12  |
| 3.1.3.5f  | 5'-nucleotidase                                                    | Nicotinate           | 1            | 1            | 1            | 1            | -1.9984E-12  | 1.45883E-11  | -1.09912E-11 | 5.59552E-12  |
| 3.1.3.5g  | 5'-nucleotidase                                                    | Purine               | 1            | 1            | 1            | 1            | -8.99281E-13 | 6.19504E-12  | -6.39488E-12 | 6.99441E-13  |
| 3.1.3.5h  | 5'-nucleotidase                                                    | Nicotinate           | 1            | 1            | 1            | 1            | -6.99441E-13 | 6.4948E-12   | -4.09672E-12 | 3.09752E-12  |
| 3.1.3.5i  | 5'-nucleotidase                                                    | Purine               | 1            | 1            | 1            | 1            | 0            | 6.99441E-12  | -7.99361E-12 | -9.99201E-13 |
| 3.1.3.5j  | 5'-nucleotidase                                                    | Purine               | 1            | 1            | 1            | 1            | 0            | 8.59313E-12  | -5.29576E-12 | 3.29736E-12  |
| 3.1.3.5k  | 2'-Deoxyuridine 5'-monophosphate phosphohydrolase                  | Pyrimidine           | 1            | 1            | 1            | 1            | -2.9976E-13  | 1.0103E-11   | -3.29736E-12 | 7.10543E-12  |
| 3.1.4.11  | phosphoinositide phospholipase C                                   | Phospholipid         | 1            | 1            | 1            | 1            | 0            | 0            | 0            | 0            |
| 3.1.4.17a | 3',5'-cyclic-nucleotide phosphodiesterase                          | Purine               | 1            | 1            | 1            | 1            | -4.996E-13   | 1.07914E-11  | -6.4948E-12  | 4.79616E-12  |
| 3.1.4.17b | 3',5'-cyclic-nucleotide phosphodiesterase                          | Purine               | 1            | 1            | 1            | 1            | 0            | 1.9984E-12   | 2.9976E-13   | 2.29816E-12  |
| 3.1.4.46  | glycerophosphodiester phosphodiesterase                            | Phospholipid         | 1            | 1            | 1            | 1            | -8.99281E-13 | 1.14908E-11  | -6.99441E-12 | 5.39568E-12  |
| 3.3.1.1   | adenosylhomocysteinease                                            | Cysteine/Methionine  | 1            | 1            | 1            | 1            | 5.9952E-13   | 6.79456E-12  | -1.9984E-12  | 4.19664E-12  |
| 3.5.1.18  | succinyl-diaminopimelate desuccinylase                             | Lysine               | 0            | 0            | 0            | 0            | 0            | 0            | 0            | 0            |
| 3.5.1.19  | nicotinamidase                                                     | Nicotinate           | 1            | 1            | 1            | 1            | -1.9984E-12  | 1.45883E-11  | -1.09912E-11 | 5.59552E-12  |



|           |                                                      |                           |              |              |              |              |              |              |              |              |
|-----------|------------------------------------------------------|---------------------------|--------------|--------------|--------------|--------------|--------------|--------------|--------------|--------------|
| 3.5.1.89  | N-acetylglucosaminylphosphatidylinositol deacetylase | Phospholipid              | 1            | 1            | 1            | 1            | 0            | 0            | 0            | 0            |
| 3.5.2.3   | dihydroorotase                                       | Pyrimidine                | -1.12084E-22 | -1.76455E-21 | -6.84211E-24 | 5.69964E-22  | 1.65246E-19  | -5.76806E-20 | -1.05241E-20 | -2.33451E-19 |
| 3.5.3.6   | arginine deiminase                                   | Arginine/Proline          | 0.972219727  | 0.967916414  | 0.975155086  | 0.970208936  | 0.430331239  | 0.494614976  | -0.293535925 | -0.229252188 |
| 3.5.4.12  | dCMP aminohydrolase                                  | Pyrimidine                | 0.999955332  | 0.999947124  | 0.999956321  | 0.999953365  | 0.000820753  | 0.000295562  | -9.89011E-05 | -0.000624092 |
| 3.5.4.16  | GTP cyclohydrolase I                                 | Folate                    | 0            | 5.9655E-14   | -1.03646E-28 | 0            | -5.9655E-12  | -1.03646E-26 | 1.03646E-26  | 5.9655E-12   |
| 3.5.4.2   | adenine deaminase                                    | Purine                    | 1            | 1            | 1            | 1            | -1.69864E-12 | 6.29496E-12  | -6.19504E-12 | 1.79856E-12  |
| 3.5.4.4a  | adenosine deaminase                                  | Purine                    | 1            | 1            | 1            | 1            | -8.99281E-13 | 5.19584E-12  | -3.29736E-12 | 2.79776E-12  |
| 3.5.4.4b  | adenosine deaminase                                  | Purine                    | 1            | 1            | 1            | 1            | 9.99201E-13  | 1.03917E-11  | -4.996E-12   | 4.39648E-12  |
| 3.5.4.6   | AMP deaminase                                        | Purine                    | 1            | 1            | 1            | 1            | -6.99441E-13 | 1.10911E-11  | -8.09353E-12 | 3.69704E-12  |
| 3.6.1.-   | Hydrolases                                           | Folate                    | 1            | 1            | 1            | 1            | -9.99201E-14 | 0            | -2.9976E-13  | -1.9984E-13  |
| 3.6.1.1   | inorganic diphosphatase                              | Misc                      | 1            | 1            | 1            | 1            | 0            | 0            | 0            | 0            |
| 3.6.1.22a | NAD+ diphosphatase                                   | Nicotinate                | 1            | 1            | 1            | 1            | -1.9984E-12  | 1.45883E-11  | -1.09912E-11 | 5.59552E-12  |
| 3.6.1.22b | NAD+ diphosphatase                                   | Nicotinate                | 1            | 1            | 1            | 1            | -9.99201E-14 | 1.15019E-11  | -3.9968E-12  | 7.60503E-12  |
| 3.6.1.23  | dUTP diphosphatase                                   | Pyrimidine                | 1            | 1            | 1            | 1            | -3.9968E-13  | 6.99441E-12  | -3.39728E-12 | 3.9968E-12   |
| 3.6.1.29  | bis(5'-adenosyl)-triphosphatase                      | Purine                    | 1            | 1            | 1            | 1            | 0            | 0            | 0            | 0            |
| 3.6.1.5a  | apyrase                                              | Purine                    | 1            | 1            | 1            | 1            | 0            | 0            | 0            | 0            |
| 3.6.1.5b  | apyrase                                              | Purine                    | 1            | 1            | 1            | 1            | -5.9952E-13  | 0            | -8.99281E-13 | -2.9976E-13  |
| 3.6.1.5c  | apyrase                                              | Pyrimidine                | 1            | 1            | 1            | 1            | -1.29896E-12 | -8.69305E-12 | 3.29736E-12  | -4.09672E-12 |
| 3.6.1.5d  | apyrase                                              | Pyrimidine                | 1            | 1            | 1            | 1            | -3.9968E-13  | 1.09912E-11  | -1.14908E-11 | -9.99201E-14 |
| 3.6.1.5e  | apyrase                                              | Purine                    | 1            | 1            | 1            | 1            | 2.9976E-13   | 6.79456E-12  | -1.4988E-12  | 4.996E-12    |
| 3.6.1.5f  | apyrase                                              | Purine                    | 1            | 1            | 1            | 1            | 0            | 1.1191E-11   | -8.29337E-12 | 2.89768E-12  |
| 3.6.1.5g  | apyrase                                              | Pyrimidine                | 1            | 1            | 1            | 1            | 3.9968E-13   | 1.41998E-11  | -3.59712E-12 | 1.02029E-11  |
| 3.6.1.5h  | apyrase                                              | Pyrimidine                | 1            | 1            | 1            | 1            | -1.9984E-13  | 1.80966E-11  | -8.99281E-12 | 9.30367E-12  |
| 3.6.1.5i  | apyrase                                              | Purine                    | 1            | 1            | 1            | 1            | -4.996E-13   | 3.69704E-12  | -2.498E-12   | 1.69864E-12  |
| 3.6.1.5j  | apyrase                                              | Purine                    | 1            | 1            | 1            | 1            | 1.9984E-13   | 0            | 0            | -1.9984E-13  |
| 3.6.1.5k  | apyrase                                              | Pyrimidine                | 1            | 1            | 1            | 1            | -1.4988E-12  | 6.09512E-12  | -3.59712E-12 | 3.9968E-12   |
| 3.6.1.5l  | apyrase                                              | Pyrimidine                | 1            | 1            | 1            | 1            | 3.9968E-13   | 1.05915E-11  | -1.03917E-11 | -1.9984E-13  |
| 3.6.1.7   | acylphosphatase                                      | Misc                      | 0.999640005  | 1            | 0.999498126  | 1            | -0.035999496 | -0.050187409 | 0.014187913  | 6.09512E-12  |
| 3.6.3.12  | K+-transporting ATPase                               | Extracellular Transport   | 1            | 1            | 1            | 1            | 0            | 0            | 0            | 0            |
| 3.6.3.14  | H+-transporting two-sector ATPase                    | Oxidative Phosphorylation | 0            | 0            | 0            | 0            | 0            | 0            | 0            | 0            |
| 3.6.3.16  | arsenite-transporting ATPase                         | Extracellular Transport   | 1            | 1            | 1            | 1            | 0            | 0            | 0            | 0            |
| 3.6.3.25  | sulfate-transporting ATPase                          | Extracellular Transport   | 1            | 1            | 1            | 1            | 0            | 0            | 0            | 0            |
| 3.6.3.4   | Cu2+-exporting ATPase                                | Extracellular Transport   | 1            | 1            | 1            | 1            | 0            | 0            | 0            | 0            |
| 3.6.3.44  | xenobiotic-transporting ATPase                       | Extracellular Transport   | 1            | 1            | 1            | 1            | 0            | 0            | 0            | 0            |
| 3.6.3.6   | H+-exporting ATPase                                  | Extracellular Transport   | 1            | 1            | 0            | 0.182691906  | -9.99201E-14 | -18.26919065 | 100          | 81.73080935  |
| 3.6.3.8   | Ca2+-transporting ATPase                             | Extracellular Transport   | 1            | 1            | 1            | 1            | 0            | 0            | 0            | 0            |
| 4.1.1.20  | diaminopimelate decarboxylase                        | Lysine                    | 0            | 0            | 0            | 0            | 0            | 0            | 0            | 0            |
| 4.1.1.23  | orotidine-5'-phosphate decarboxylase                 | Pyrimidine                | -1.12084E-22 | -1.76455E-21 | -6.84211E-24 | 5.69964E-22  | 1.65246E-19  | -5.76806E-20 | -1.05241E-20 | -2.33451E-19 |
| 4.1.1.36  | phosphopantothencysteine decarboxylase               | CoA Synthesis             | 4.48662E-15  | -2.01223E-14 | -7.35677E-13 | -4.27925E-14 | 2.46089E-12  | -6.92884E-11 | 7.40164E-11  | 2.26702E-12  |
| 4.1.1.37  | uroporphyrinogen decarboxylase                       | Porphyrin                 | 0            | 0            | 0            | 0            | 0            | 0            | 0            | 0            |
| 4.1.1.49  | phosphoenolpyruvate carboxylase (ATP)                | Glycolysis                | 1            | 1            | 1            | 1            | 3.9968E-13   | 5.29576E-12  | -3.09752E-12 | 1.79856E-12  |
| 4.1.1.65  | phosphatidylserine decarboxylase                     | Phospholipid              | 0            | 0            | 0            | 0            | 0            | 0            | 0            | 0            |
| 4.1.2.13a | fructose-bisphosphate aldolase                       | Glycolysis                | 0.79556231   | 0.531160757  | 0.609323085  | 0.452122084  | 26.4401553   | 15.72010011  | 18.62392249  | 7.903867299  |
| 4.1.2.13b | fructose-bisphosphate aldolase                       | Pentose Phosphate         | 1            | 1            | 1            | 1            | 0            | 6.19504E-12  | -5.69544E-12 | 4.996E-13    |
| 4.1.2.25  | dihydroneopterin aldolase                            | Folate                    | 1            | 1            | 1            | 1            | -9.99201E-14 | 0            | -2.9976E-13  | -1.9984E-13  |
| 4.1.2.4   | deoxyribose-phosphate aldolase                       | Pentose Phosphate         | 1            | 1            | 1            | 1            | 0            | 0            | 0            | 0            |
| 4.1.3.30  | methylisocitrate lyase                               | MC Cycle                  | 0.912306258  | 0.981502922  | 0.89914251   | 0.996463615  | -6.919666435 | -9.732110504 | 1.316374729  | -1.49606934  |
| 4.1.3.38  | aminodeoxychorismate lyase                           | Folate                    | 1            | 1            | 1            | 1            | 9.99201E-14  | 0            | -3.9968E-13  | -4.996E-13   |
| 4.2.1.10  | 3-dehydroquinate dehydratase                         | Shikimate                 | 1            | 1            | 1            | 1            | 9.99201E-14  | 0            | -3.9968E-13  | -4.996E-13   |
| 4.2.1.11  | phosphopyruvate hydratase                            | Glycolysis                | 1.23067E-15  | 2.05338E-15  | -9.59269E-17 | 1.25441E-15  | -8.22711E-14 | -1.35034E-13 | 1.3266E-13   | 7.9897E-14   |
| 4.2.1.17a | enoyl-CoA hydratase                                  | Beta Oxidation            | 1            | 1            | 1            | 1            | 0            | 1.4988E-12   | -5.9952E-13  | 8.99281E-13  |
| 4.2.1.17b | enoyl-CoA hydratase                                  | Branched Amino Acid       | 1            | 1            | 0.89914251   | 0.996463615  | 3.9968E-13   | -9.732110504 | 10.08574896  | 0.353638453  |
| 4.2.1.17c | enoyl-CoA hydratase                                  | Branched Amino Acid       | 0.948789313  | 0.981697664  | 1            | 1            | -3.290835128 | 0            | -5.121068701 | -1.830233573 |
| 4.2.1.18  | methylglutaconyl-CoA hydratase                       | Branched Amino Acid       | 1            | 1            | 1            | 1            | 1.69864E-12  | 0            | -9.99201E-14 | -1.79856E-12 |
| 4.2.1.2   | fumarate hydratase                                   | TCA Cycle                 | 0.760384315  | 0.909046378  | 0.427025467  | 0.992667487  | -14.86620629 | -56.56420202 | 33.3358848   | -8.362110933 |
| 4.2.1.22  | cystathionine beta-synthase                          | Cysteine/Methionine       | 1            | 1            | 1            | 1            | 0            | 0            | 0            | 0            |
| 4.2.1.24  | porphobilinogen synthase                             | Porphyrin                 | 0            | 0            | 0            | 0            | 0            | 0            | 0            | 0            |
| 4.2.1.3   | aconitate hydratase                                  | TCA Cycle                 | 0.98592745   | 0.994576299  | 0.579376315  | 0.997577411  | -0.864884917 | -41.8201096  | 40.65511352  | -0.300111159 |
| 4.2.1.52  | dihydrodipicolinate synthase                         | Lysine                    | 0            | 0            | 0            | 0            | 0            | 0            | 0            | 0            |
| 4.2.1.60a | 3-hydroxydecanoyl-[acp] dehydratase                  | Fatty Acid Synthesis      | -1.8753E-17  | -3.44621E-17 | 3.01758E-15  | -9.08772E-18 | 1.57091E-15  | 3.02667E-13  | -3.03633E-13 | -2.53743E-15 |
| 4.2.1.60b | 3-hydroxydecanoyl-[acp] dehydratase                  | Fatty Acid Synthesis      | -1.8753E-17  | -3.44621E-17 | 3.01758E-15  | -9.08772E-18 | 1.57091E-15  | 3.02667E-13  | -3.03633E-13 | -2.53743E-15 |
| 4.2.1.60c | 3-hydroxydecanoyl-[acp] dehydratase                  | Fatty Acid Synthesis      | 0            | 0            | 0            | 0            | 0            | 0            | 0            | 0            |
| 4.2.1.60d | 3-hydroxydecanoyl-[acp] dehydratase                  | Fatty Acid Synthesis      | 0            | 0            | 0            | 0            | 0            | 0            | 0            | 0            |
| 4.2.1.60e | 3-hydroxydecanoyl-[acp] dehydratase                  | Fatty Acid Synthesis      | 0            | 0            | 0            | 0            | 0            | 0            | 0            | 0            |
| 4.2.1.61a | 3-hydroxydecanoyl-[acp] dehydratase                  | Fatty Acid Synthesis      | -1.8753E-17  | -3.44621E-17 | 3.01758E-15  | -9.08772E-18 | 1.57091E-15  | 3.02667E-13  | -3.03633E-13 | -2.53743E-15 |
| 4.2.1.61b | 3-hydroxydecanoyl-[acp] dehydratase                  | Fatty Acid Synthesis      | -1.8753E-17  | -3.44621E-17 | 3.01758E-15  | -9.08772E-18 | 1.57091E-15  | 3.02667E-13  | -3.03633E-13 | -2.53743E-15 |
| 4.2.1.61c | 3-hydroxydecanoyl-[acp] dehydratase                  | Fatty Acid Synthesis      | -4.71186E-25 | -1.61003E-16 | 9.74717E-16  | 1.35057E-16  | 1.61003E-14  | 8.3966E-14   | -9.74717E-14 | -2.9606E-14  |
| 4.2.1.75  | uroporphyrinogen-III synthase                        | Porphyrin                 | 0            | 0            | 0            | 0            | 0            | 0            | 0            | 0            |
| 4.2.1.79  | 2-methylcitrate dehydratase                          | MC Cycle                  | 0.912306258  | 0.981502922  | 0.89914251   | 0.996463615  | -6.919666435 | -9.732110504 | 1.316374729  | -1.49606934  |





|     |                                 |                      |              |              |              |              |              |              |              |              |
|-----|---------------------------------|----------------------|--------------|--------------|--------------|--------------|--------------|--------------|--------------|--------------|
| O5  | phosphate[a]                    | Organellar Transport | 1            | 1            | 1            | 1            | -9.99201E-14 | 6.19504E-12  | -5.09592E-12 | 1.19904E-12  |
| O6  | diphosphate[a]                  | Organellar Transport | -1.30297E-24 | -1.11443E-23 | -9.33344E-15 | 6.10553E-16  | 9.84136E-22  | -9.94399E-13 | 9.33344E-13  | -6.10553E-14 |
| O7  | NADH[a]                         | Organellar Transport | 1            | 1            | 1            | 1            | 2.9976E-13   | 6.09512E-12  | -4.4964E-12  | 1.29896E-12  |
| O8  | NAD+[a]                         | Organellar Transport | 1            | 1            | 1            | 1            | 2.9976E-13   | 6.09512E-12  | -4.4964E-12  | 1.29896E-12  |
| O9  | NADPH[a]                        | Organellar Transport | 1.89016E-15  | 2.58917E-16  | -1.65325E-15 | -5.96428E-16 | 1.63124E-13  | -1.05682E-13 | 3.5434E-13   | 8.55345E-14  |
| O10 | NADP+[a]                        | Organellar Transport | 6.63723E-28  | 5.22748E-16  | 7.08811E-16  | 1.20648E-15  | -5.22748E-14 | -4.97671E-14 | -7.08811E-14 | -6.83734E-14 |
| O11 | H+[a]                           | Organellar Transport | 1            | 1            | 1            | 1            | -9.99201E-14 | 5.79536E-12  | -4.39648E-12 | 1.4988E-12   |
| O12 | Fe2+[m]                         | Organellar Transport | 0            | 0            | 0            | 0            | 0            | 0            | 0            | 0            |
| O13 | O2[a]                           | Organellar Transport | -4.71186E-25 | -1.61003E-16 | 9.74717E-16  | 1.35057E-16  | 1.61003E-14  | 8.3966E-14   | -9.74717E-14 | -2.9606E-14  |
| O14 | H2O[a]                          | Organellar Transport | 0.979767695  | 1            | 0.980206818  | 1            | -2.023230515 | -1.979318242 | -0.043912273 | 3.9968E-12   |
| O15 | CO2[a]                          | Organellar Transport | 1.47889E-14  | 1.39398E-15  | 1.71963E-14  | 2.15545E-14  | 1.3395E-12   | -4.3582E-13  | -2.40739E-13 | -2.01606E-12 |
| O16 | H2O2[a]                         | Organellar Transport | 1            | 1            | 1            | 1            | 0            | 0            | 0            | 0            |
| O17 | NH3[a]                          | Organellar Transport | 0            | 0            | 0            | 0            | 0            | 0            | 0            | 0            |
| O18 | CoA[a]                          | Organellar Transport | 6.95535E-24  | -2.51629E-25 | 9.51168E-16  | 3.04616E-12  | 7.20698E-22  | -3.04521E-10 | -9.51168E-14 | -3.04616E-10 |
| O19 | palmitoyl-CoA[a]                | Organellar Transport | 2.32486E-16  | -7.04341E-16 | 3.24818E-15  | 4.22005E-17  | 9.36827E-14  | 3.20598E-13  | -3.01569E-13 | -7.46541E-14 |
| O20 | glycerone-phosphate[a]          | Organellar Transport | 1            | 1            | 1            | 1            | -1.09912E-12 | 5.4956E-12   | -5.29576E-12 | 1.29896E-12  |
| O21 | phosphoenolpyruvate[a]          | Organellar Transport | 0            | 0            | 0            | 0            | 0            | 0            | 0            | 0            |
| O22 | 3-phospho-D-glycerate[a]        | Organellar Transport | 1            | 1            | 1            | 1            | 3.9968E-13   | 6.19504E-12  | -3.9968E-12  | 1.79856E-12  |
| O23 | ATP[er]                         | Organellar Transport | 1            | 1            | 1            | 1            | -2.9976E-13  | 5.59552E-12  | -1.39888E-12 | 4.4964E-12   |
| O24 | ADP[er]                         | Organellar Transport | 1            | 1            | 1            | 1            | -2.9976E-13  | 5.59552E-12  | -1.39888E-12 | 4.4964E-12   |
| O25 | CTP[er]                         | Organellar Transport | 0            | 0            | 0            | 0            | 0            | 0            | 0            | 0            |
| O26 | CMP[er]                         | Organellar Transport | 0            | 0            | -2.34289E-28 | -1.04552E-29 | 0            | -2.23833E-26 | 2.34289E-26  | 1.04552E-27  |
| O27 | phosphate[er]                   | Organellar Transport | 0            | 0            | 0            | 0            | 0            | 0            | 0            | 0            |
| O28 | NAD+[er]                        | Organellar Transport | 1            | 1            | 1            | 1            | 0            | 0            | 0            | 0            |
| O29 | NADH[er]                        | Organellar Transport | 1            | 1            | 1            | 1            | 0            | 0            | 0            | 0            |
| O30 | NADP+[er]                       | Organellar Transport | 0            | 0            | 0            | 0            | 0            | 0            | 0            | 0            |
| O31 | NADPH[er]                       | Organellar Transport | 0            | 0            | 0            | 0            | 0            | 0            | 0            | 0            |
| O32 | H+[er]                          | Organellar Transport | 0            | 0            | 0            | 0            | 0            | 0            | 0            | 0            |
| O33 | O2[er]                          | Organellar Transport | 0            | 0            | 0            | 0            | 0            | 0            | 0            | 0            |
| O34 | H2O[er]                         | Organellar Transport | 0            | 0            | -6.66072E-27 | -9.92225E-28 | 0            | -5.66849E-25 | 6.66072E-25  | 9.92225E-26  |
| O35 | CO2[er]                         | Organellar Transport | 0            | 0            | 0            | 0            | 0            | 0            | 0            | 0            |
| O36 | L-serine[er]                    | Organellar Transport | 0            | 0            | 0            | 0            | 0            | 0            | 0            | 0            |
| O37 | CoA[er]                         | Organellar Transport | -1.0518E-14  | 0            | 3.4968E-16   | 2.94505E-16  | -1.0518E-12  | 5.51749E-15  | -1.08677E-12 | -2.94505E-14 |
| O38 | acyl[er]                        | Organellar Transport | 1            | 1            | 1            | 1            | -8.99281E-13 | 1.14908E-11  | -6.99441E-12 | 5.39568E-12  |
| O39 | acyl-CoA[er]                    | Organellar Transport | 5.52121E-15  | 1.52672E-16  | 3.69321E-16  | 3.5346E-16   | 5.36854E-13  | 1.58614E-15  | 5.15189E-13  | -2.00788E-14 |
| O40 | palmitoyl-CoA[er]               | Organellar Transport | 0            | 0            | 0            | 0            | 0            | 0            | 0            | 0            |
| O41 | 1D-myo-inositol-3-phosphate[er] | Organellar Transport | 0            | 0            | 0            | 0            | 0            | 0            | 0            | 0            |
| O42 | CDP-choline[er]                 | Organellar Transport | 0            | 0            | 0            | 0            | 0            | 0            | 0            | 0            |
| O43 | sn-glycerol-3-phosphate[er]     | Organellar Transport | -1.79849E-28 | 3.46964E-16  | 1.83656E-22  | -3.27301E-12 | -3.46964E-14 | 3.27301E-10  | -1.83656E-20 | 3.27336E-10  |
| O44 | sn-glycero-3-phosphocholine[er] | Organellar Transport | 1            | 1            | 1            | 1            | -8.99281E-13 | 1.14908E-11  | -6.99441E-12 | 5.39568E-12  |
| O45 | ATP[m]                          | Organellar Transport | 0            | 0            | 0            | 0            | 0            | 0            | 0            | 0            |
| O46 | ADP[m]                          | Organellar Transport | 0            | 0            | 0            | 0            | 0            | 0            | 0            | 0            |
| O47 | AMP[m]                          | Organellar Transport | 1            | 1            | 1            | 1            | -1.39888E-12 | 1.02918E-11  | -6.4948E-12  | 5.19584E-12  |
| O48 | CTP[m]                          | Organellar Transport | 4.48662E-15  | -2.01223E-14 | -7.35677E-13 | -4.27925E-14 | -2.46089E-12 | -6.92884E-11 | 7.40164E-11  | 2.26702E-12  |
| O49 | phosphate[m]                    | Organellar Transport | 0            | 0            | 0            | 0            | 0            | 0            | 0            | 0            |
| O50 | diphosphate[m]                  | Organellar Transport | -4.7817E-30  | 3.4199E-29   | 0            | -2.87355E-12 | -3.89807E-27 | 2.87355E-10  | -4.7817E-28  | 2.87355E-10  |
| O51 | NAD+[m]                         | Organellar Transport | 0.977800111  | 0.930750725  | 0.995392603  | 0.900843645  | 4.704938583  | 9.454895818  | -1.759249175 | 2.99070806   |
| O52 | NADH[m]                         | Organellar Transport | 0.977800111  | 0.930750725  | 0.995392603  | 0.900843645  | 4.704938583  | 9.454895818  | -1.759249176 | 2.99070806   |
| O53 | NADP+[m]                        | Organellar Transport | 0.866575338  | 0.673292085  | 0.119316711  | 0.161596402  | 19.32832536  | -4.227969104 | 74.72586269  | 51.16956823  |
| O54 | NADPH[m]                        | Organellar Transport | 0.866575338  | 0.673292085  | 0.119316711  | 0.161596402  | 19.32832536  | -4.227969104 | 74.72586269  | 51.16956823  |
| O55 | H+[m]                           | Organellar Transport | 0.818367088  | 0.619066474  | 0.198555082  | 0.195957263  | 19.93006142  | 0.25978189   | 61.98120062  | 42.3109211   |
| O56 | H2O2[m]                         | Organellar Transport | 1.84973E-26  | 8.57786E-13  | -6.78311E-13 | 6.31664E-26  | -8.57786E-11 | -6.78311E-11 | 6.78311E-11  | 8.57786E-11  |
| O57 | O2[m]                           | Organellar Transport | 0            | 0            | 0            | 0            | 0            | 0            | 0            | 0            |
| O58 | H2O[m]                          | Organellar Transport | 0            | 0            | 0            | 0            | 0            | 0            | 0            | 0            |
| O59 | CO2[m]                          | Organellar Transport | 0.772264551  | 0.923249308  | 0.448626565  | 0.996872268  | -15.09847572 | -54.82457034 | 32.36379854  | -7.362296075 |
| O60 | NH3[m]                          | Organellar Transport | 0.864449817  | 0.906324076  | 0.8683807    | 0.960327533  | -4.187425978 | -9.194683251 | -0.393088359 | -5.400345632 |
| O61 | L-aspartate[m]                  | Organellar Transport | 0            | 0            | 0            | 0            | 0            | 0            | 0            | 0            |
| O62 | L-cysteine[m]                   | Organellar Transport | 4.48662E-15  | -2.01223E-14 | -7.35677E-13 | -4.27925E-14 | 2.46089E-12  | -6.92884E-11 | 7.40164E-11  | 2.26702E-12  |
| O63 | L-isoleucine[m]                 | Organellar Transport | 1            | 1            | 0.89914251   | 0.996463615  | 3.9968E-13   | -9.732110504 | 10.08574896  | 0.353638453  |
| O64 | L-leucine[m]                    | Organellar Transport | 1            | 1            | 1            | 1            | 1.69864E-12  | 0            | -9.99201E-14 | -1.79856E-12 |
| O65 | L-valine[m]                     | Organellar Transport | 7.24182E-14  | -7.01904E-14 | -7.35677E-13 | -4.27925E-14 | 1.42609E-11  | -6.92884E-11 | 8.08095E-11  | -2.73979E-12 |
| O66 | L-serine[m]                     | Organellar Transport | 0            | 8.26888E-28  | 0            | 0            | 0            | 0            | 0            | 8.26888E-26  |
| O67 | glycine[m]                      | Organellar Transport | 0            | 0            | 0            | 0            | 0            | 0            | 0            | 0            |
| O68 | L-glutamate[m]                  | Organellar Transport | 0.954756273  | 0.955623124  | 0.963177284  | 0.959732094  | -0.086685039 | 0.344519085  | -0.842101131 | -0.410897007 |
| O69 | CoA[m]                          | Organellar Transport | 1            | 1            | 1            | 1            | -1.29896E-12 | 1.42886E-11  | -1.05915E-11 | 4.996E-12    |
| O70 | pyruvate[m]                     | Organellar Transport | 0.918907513  | 0.984931918  | 0.904435911  | 0.997011751  | -6.602440543 | -9.257584019 | 1.447160216  | -1.20798326  |
| O71 | citrate[m]                      | Organellar Transport | 2.3982E-28   | -3.29691E-28 | 3.06965E-28  | -2.62074E-26 | 5.69511E-26  | 2.65143E-24  | -6.71453E-27 | 2.58777E-24  |
| O72 | (S)-dihydroorotate[m]           | Organellar Transport | -1.12084E-22 | -1.76455E-21 | -6.84211E-24 | 5.69964E-22  | 1.65246E-19  | -5.76806E-20 | -1.05241E-20 | -2.33451E-19 |
| O73 | orotate[m]                      | Organellar Transport | -1.12084E-22 | -1.76455E-21 | -6.84211E-24 | 5.69964E-22  | 1.65246E-19  | -5.76806E-20 | -1.05241E-20 | -2.33451E-19 |

|           |                                                       |                         |              |              |              |              |              |              |              |              |
|-----------|-------------------------------------------------------|-------------------------|--------------|--------------|--------------|--------------|--------------|--------------|--------------|--------------|
| O74       | (R)-pantoate[m]                                       | Organelar Transport     | 4.48662E-15  | -2.01223E-14 | -7.35677E-13 | -4.27925E-14 | 2.46089E-12  | -6.92884E-11 | 7.40164E-11  | 2.26702E-12  |
| O75       | pantothenate[m]                                       | Organelar Transport     | 4.48662E-15  | -2.01223E-14 | -7.35677E-13 | -4.27925E-14 | 2.46089E-12  | -6.92884E-11 | 7.40164E-11  | 2.26702E-12  |
| O76       | dimethylallyl-diphosphate[a/m]                        | Organelar Transport     | 0            | 0            | 0            | 0            | 0            | 0            | 0            | 0            |
| O77       | isopentenyl-diphosphate[a/m]                          | Organelar Transport     | 0            | 0            | 0            | 0            | 0            | 0            | 0            | 0            |
| O78       | N6-(1,2-Dicarboxyethyl)-AMP[m]                        | Organelar Transport     | 1            | 1            | 1            | 1            | -4.996E-13   | 1.02918E-11  | -5.89528E-12 | 4.89608E-12  |
| O79       | 5-aminolevulinate[a/m]                                | Organelar Transport     | 0            | 0            | 0            | 0            | 0            | 0            | 0            | 0            |
| O80       | tetrahydrofolate[m]                                   | Organelar Transport     | 1.3008E-16   | 1.40728E-13  | -2.20075E-13 | 3.64707E-13  | -1.40598E-11 | -5.84782E-11 | 2.20205E-11  | -2.2398E-11  |
| O81       | 5,10-methylenetetrahydrofolate[m]                     | Organelar Transport     | 0            | -7.13833E-31 | -5.61836E-28 | -7.48722E-27 | 7.13833E-29  | 6.92539E-25  | 5.61836E-26  | 7.48651E-25  |
| O82       | coproporphyrinogen-III                                | Organelar Transport     | 0            | 0            | 0            | 0            | 0            | 0            | 0            | 0            |
| O83       | protoporphyrinogen-IX                                 | Organelar Transport     | 0            | 0            | 0            | 0            | 0            | 0            | 0            | 0            |
| O84       | heme                                                  | Organelar Transport     | 0            | 0            | 0            | 0            | 0            | 0            | 0            | 0            |
| O85       | ferrocytochrome-c                                     | Organelar Transport     | 1            | 1            | 1            | 1            | 1.9984E-13   | 3.39728E-12  | -6.99441E-13 | 2.498E-12    |
| T1        | spermine import                                       | Extracellular Transport | 4.48662E-15  | -2.01223E-14 | -7.35677E-13 | -4.27925E-14 | 2.46089E-12  | -6.92884E-11 | 7.40164E-11  | 2.26702E-12  |
| T2        | arginine transport                                    | Extracellular Transport | 0            | 0            | 0            | 0            | 0            | 0            | 0            | 0            |
| T3        | ornithine transport                                   | Extracellular Transport | 0.999377281  | 0.998631242  | 0.996424789  | 1            | 0.074603861  | -0.357521054 | 0.295249137  | -0.136875778 |
| T4        | glucose transport                                     | Extracellular Transport | 7.65506E-17  | 1            | 0            | 1            | -100         | -100         | 7.65506E-15  | 0            |
| T5        | folic acid transport                                  | Extracellular Transport | 0.906581551  | 0.926728226  | 4.35651E-13  | 3.63175E-13  | -2.01466753  | 7.24769E-12  | 90.65815507  | 92.6728226   |
| T6        | adenosine transport                                   | Extracellular Transport | 0.995417994  | 0.998380555  | 0.995518996  | 0.998570171  | -0.29625608  | -0.305117543 | -0.010100154 | -0.018961617 |
| T7        | tryptophan transport                                  | Extracellular Transport | 0            | 0            | 0            | 0            | 0            | 0            | 0            | 0            |
| T8        | cysteine transport                                    | Extracellular Transport | 0            | 0            | -7.15859E-30 | 0            | 0            | -7.15859E-28 | 7.15859E-28  | 0            |
| T9        | histidine transport                                   | Extracellular Transport | 0            | 0            | 0            | 0            | 0            | 0            | 0            | 0            |
| T10       | threonine transport                                   | Extracellular Transport | 0            | 0            | 0            | 0            | 0            | 0            | 0            | 0            |
| T11       | isoleucine transport                                  | Extracellular Transport | 0            | 0            | 1.80239E-31  | 0            | 0            | 1.80239E-29  | -1.80239E-29 | 0            |
| T12       | leucine transport                                     | Extracellular Transport | 0            | -4.1123E-29  | 0            | 0            | 4.1123E-27   | 0            | 0            | -4.1123E-27  |
| T13       | methionine transport                                  | Extracellular Transport | 0            | 0            | 0            | 0            | 0            | 0            | 0            | 0            |
| T14       | phenylalanine transport                               | Extracellular Transport | 0            | 0            | 0            | 0            | 0            | 0            | 0            | 0            |
| T15       | tyrosine transport                                    | Extracellular Transport | 0            | 0            | 0            | 0            | 0            | 0            | 0            | 0            |
| T16       | valine transport                                      | Extracellular Transport | 4.49316E-15  | -2.30703E-15 | -1.42802E-32 | 0            | 6.80019E-13  | -1.42802E-30 | 4.49316E-13  | -2.30703E-13 |
| T17       | cholesterol transport                                 | Extracellular Transport | 0            | 0            | 0            | 0            | 0            | 0            | 0            | 0            |
| T18       | choline transport                                     | Extracellular Transport | 9.70979E-43  | -1.91626E-28 | 1.44923E-45  | 1.13793E-28  | 1.91626E-26  | -1.13793E-26 | 9.69529E-41  | -3.0542E-26  |
| T19       | adenine transport                                     | Extracellular Transport | 1            | 1            | 1            | 1            | 7.99361E-13  | 9.10383E-12  | -1.09912E-12 | 7.20535E-12  |
| T20       | serine transport                                      | Extracellular Transport | 1            | 1            | 1            | 1            | -1.19904E-12 | 7.69385E-12  | -4.39648E-12 | 4.4964E-12   |
| T21       | Iron (II) ion transport                               | Extracellular Transport | 0            | 0            | 0            | 0            | 0            | 0            | 0            | 0            |
| T22       | (S)-lactate transport                                 | Extracellular Transport | 0.548794889  | 0.365399255  | 0.385660047  | 0.290195542  | 18.33965337  | 9.546450591  | 16.31348411  | 7.520371338  |
| X1        | oxidative stress                                      | Stress                  | 1            | 1            | 1            | 1            | 0            | 0            | 0            | 0            |
| D1        | water                                                 | Diffusion               | 0.986123569  | 0.88771845   | 0.934298806  | 0.996772524  | 9.840511915  | -6.247371827 | 5.182476297  | -10.90540744 |
| D2        | oxygen import                                         | Diffusion               | 0            | 0            | 0            | 0            | 0            | 0            | 0            | 0            |
| D3        | CO2 export                                            | Diffusion               | 0            | 0            | 0            | 0            | 0            | 0            | 0            | 0            |
| D4        | NH3 import                                            | Diffusion               | 0.900095002  | 0.942046245  | 0.884293839  | 0.970922374  | -4.195124207 | -8.662853429 | 1.580116314  | -2.887612908 |
| D5        | diphosphate                                           | Diffusion               | 0.898765729  | 0.662465977  | 0.728872861  | 0.606656791  | 23.62997518  | 12.22160696  | 16.98928686  | 5.580918629  |
| D6        | phosphate                                             | Diffusion               | 0.673014687  | 0.665758983  | 0.494175477  | 0.60933143   | 0.725570451  | -11.51559532 | 17.88392104  | 5.642755267  |
| D7        | ethanol                                               | Diffusion               | 0.999640005  | 0.999520476  | 0.999498126  | 0.999396909  | 0.011952855  | 0.010121677  | 0.014187913  | 0.012356735  |
| Demand    | acyl carrier protein                                  | Demand                  | -3.20318E-27 | -6.44494E-27 | 1.50644E-24  | -2.38004E-22 | 3.24175E-25  | 2.3951E-20   | -1.50964E-22 | 2.37998E-20  |
| Sink1     | 4-aminobutanoate                                      | Sink                    | 4.48662E-15  | -2.01223E-14 | -7.35677E-13 | -4.27925E-14 | 2.46089E-12  | -6.92884E-11 | 7.40164E-11  | 2.26702E-12  |
| Sink2     | formate                                               | Sink                    | 0            | 5.9655E-14   | -1.03646E-28 | 0            | -5.9655E-12  | -1.03646E-26 | 1.03646E-26  | 5.9655E-12   |
| Sink3     | 3-acetamidopropanal                                   | Sink                    | 4.48662E-15  | -2.01223E-14 | -7.35677E-13 | -4.27925E-14 | 2.46089E-12  | -6.92884E-11 | 7.40164E-11  | 2.26702E-12  |
| Sink4     | 5,10-methylenetetrahydrofolate[m]                     | Sink                    | 1.8907E-13   | 1.3936E-13   | 8.7226E-16   | 3.67628E-13  | 4.97095E-12  | -3.66756E-11 | 1.88198E-11  | -2.28268E-11 |
| Sink5     | glycolaldehyde                                        | Sink                    | 1            | 1            | 1            | 1            | -9.99201E-14 | 0            | -2.9976E-13  | -1.9984E-13  |
| Sink6     | 3,4-dihydroxy-L-phenylalanine                         | Sink                    | 1            | 1            | 1            | 1            | 0            | -1.09912E-12 | -6.99441E-13 | -1.79856E-12 |
| 3.2.1.20  | alpha-glucosidase                                     | Misc                    | 1            | 5.64243E-17  | 1            | 0            | 100          | 100          | 0            | 5.64243E-15  |
| T23       | Sucrose transport                                     | Extracellular Transport | 1            | 5.64243E-17  | 1            | 0            | 100          | 100          | 0            | 5.64243E-15  |
| 2.7.1.1b  | hexokinase                                            | Misc                    | 1            | 5.64243E-17  | 1            | 0            | 100          | 100          | 0            | 5.64243E-15  |
| T24       | Fructose transport                                    | Extracellular Transport | 1            | 1            | 1            | 1            | 0            | 0            | 0            | 0            |
| 4.3.1.19a | L-threonine ammonia-lyase (2-oxobutanoate-forming)    | Misc                    | #N/A         | #N/A         | 1            | 1            | #N/A         | 6.59472E-12  | #N/A         | #N/A         |
| 4.3.1.19b | L-serine ammonia-lyase                                | Misc                    | #N/A         | #N/A         | 0.994234223  | 1            | #N/A         | -0.576577721 | #N/A         | #N/A         |
| T25       | 2-oxobutanoate                                        | Extracellular Transport | 1            | 1            | 1            | 1            | 0            | 6.59472E-12  | -3.9968E-12  | 2.59792E-12  |
| 1.1.1.25  | shikimate dehydrogenase                               | Shikimate               | 1            | 1            | #N/A         | #N/A         | 9.99201E-14  | #N/A         | #N/A         | #N/A         |
| 1.1.1.31  | 3-hydroxyisobutyrate dehydrogenase                    | Branched Amino Acid     | 0.948789313  | 0.981697664  | #N/A         | #N/A         | -3.290835128 | #N/A         | #N/A         | #N/A         |
| 2.4.1.117 | dolichyl-phosphate beta-glucosyltransferase           | Amino Sugar             | 1            | 1            | #N/A         | #N/A         | 0            | #N/A         | #N/A         | #N/A         |
| 2.4.1.142 | chitobiosyldiphosphodolichol beta-mannosyltransferase | Amino Sugar             | 1            | 1            | #N/A         | #N/A         | 0            | #N/A         | #N/A         | #N/A         |
| 2.4.2.3   | uridine phosphorylase                                 | Pyrimidine              | 1            | 1            | #N/A         | #N/A         | -1.29896E-12 | #N/A         | #N/A         | #N/A         |
| 2.8.1.2   | 3-mercaptopyruvate sulfurtransferase                  | Cysteine/Methionine     | 1            | 1            | #N/A         | #N/A         | 0            | #N/A         | #N/A         | #N/A         |
| 3.5.4.5   | cytidine deaminase                                    | Pyrimidine              | 1            | 1            | #N/A         | #N/A         | -4.996E-13   | #N/A         | #N/A         | #N/A         |
| 4.1.3.4   | hydroxymethylglutaryl-CoA lyase                       | Branched Amino Acid     | 1            | 1            | #N/A         | #N/A         | 1.69864E-12  | #N/A         | #N/A         | #N/A         |
| 6.2.1.16  | acetoacetate-CoA ligase                               | Misc                    | 1            | 1            | #N/A         | #N/A         | 1.69864E-12  | #N/A         | #N/A         | #N/A         |
