# Supplementary material for: Systems-Based Analysis of the Sarcocystis neurona Genome Identifies Pathways That Contribute to a Heteroxenous Life Cycle
Source: PubMed Central journal article supplement — mBio. 2015 Feb 10;6(1):e02445-14. doi: 10.1128/mBio.02445-14 (PMC4337577; doi:10.1128/mbio.02445-14), 2015-02-10
Supplement: mbo004142136st4.pdf [file mbo004142136st4.pdf]

Supplemental Table S4. Metabolic reconstruction for *S. neurona*

| Rxn name   | Rxn description                                            | Formula                                                                                          | Subsystem                 | Reversible | LB    | UB   | Obj. | E.C. number |
|------------|------------------------------------------------------------|--------------------------------------------------------------------------------------------------|---------------------------|------------|-------|------|------|-------------|
| 1.1.1.1    | alcohol dehydrogenase                                      | 1 C00469[c] + 1 C00003[c] -> 1 C00084[c] + 1 C00004[c] + 1 C00080[c]                             | Misc                      | 1          | -1000 | 1000 | 0    | 1.1.1.1     |
| 1.1.1.100a | 3-oxoacyl-[acp] reductase                                  | 1 C05744[a] + 1 C00005[a] + 1 C00080[a] -> 1 C04618[a] + 1 C00006[a]                             | Fatty Acid Synthesis      | 1          | -1000 | 1000 | 0    | 1.1.1.100   |
| 1.1.1.100b | 3-oxoacyl-[acp] reductase                                  | 1 C05753[a] + 1 C00005[a] + 1 C00080[a] -> 1 C04619[a] + 1 C00006[a]                             | Fatty Acid Synthesis      | 1          | -1000 | 1000 | 0    | 1.1.1.100   |
| 1.1.1.100c | 3-oxoacyl-[acp] reductase                                  | 1 C05750[a] + 1 C00005[a] + 1 C00080[a] -> 1 C04620[a] + 1 C00006[a]                             | Fatty Acid Synthesis      | 1          | -1000 | 1000 | 0    | 1.1.1.100   |
| 1.1.1.100d | 3-oxoacyl-[acp] reductase                                  | 1 C05762[a] + 1 C00005[a] + 1 C00080[a] -> 1 C04633[a] + 1 C00006[a]                             | Fatty Acid Synthesis      | 1          | -1000 | 1000 | 0    | 1.1.1.100   |
| 1.1.1.100e | 3-oxoacyl-[acp] reductase                                  | 1 C05759[a] + 1 C00005[a] + 1 C00080[a] -> 1 C04688[a] + 1 C00006[a]                             | Fatty Acid Synthesis      | 1          | -1000 | 1000 | 0    | 1.1.1.100   |
| 1.1.1.100f | 3-oxoacyl-[acp] reductase                                  | 1 C05746[a] + 1 C00005[a] + 1 C00080[a] -> 1 C05747[a] + 1 C00006[a]                             | Fatty Acid Synthesis      | 1          | -1000 | 1000 | 0    | 1.1.1.100   |
| 1.1.1.100g | 3-oxoacyl-[acp] reductase                                  | 1 C05756[a] + 1 C00005[a] + 1 C00080[a] -> 1 C05757[a] + 1 C00006[a]                             | Fatty Acid Synthesis      | 1          | -1000 | 1000 | 0    | 1.1.1.100   |
| 1.1.1.100h | 3-oxoacyl-[acp] reductase                                  | 1 C16219[a] + 1 C00005[a] + 1 C00080[a] -> 1 C16220[a] + 1 C00006[a]                             | Fatty Acid Synthesis      | 1          | -1000 | 1000 | 0    | 1.1.1.100   |
| 1.1.1.102  | 3-dehydroshinganine reductase                              | 1 C02934[er] + 1 C00005[er] + 1 C00080[er] -> 1 C00836[er] + 1 C00006[er]                        | Phospholipid              | 1          | -1000 | 1000 | 0    | 1.1.1.102   |
| 1.1.1.153  | sepiapterin reductase                                      | 1 C00272[c] + 2 C00006[c] -> 1 C03684[c] + 2 C00005[c] + 2 C00080[c]                             | Biopterin                 | 1          | -1000 | 1000 | 0    | 1.1.1.153   |
| 1.1.1.169  | 2-dehydropantoate 2-reductase                              | 1 C00522[m] + 1 C00006[m] -> 1 C00966[m] + 1 C00005[m] + 1 C00080[m]                             | CoA Synthesis             | 1          | -1000 | 1000 | 0    | 1.1.1.169   |
| 1.1.1.205  | IMP dehydrogenase                                          | 1 C00130[c] + 1 C00003[c] + 1 C00001[c] -> 1 C00655[c] + 1 C00004[c] + 1 C00080[c]               | Purine                    | 0          | 0     | 1000 | 0    | 1.1.1.205   |
| 1.1.1.267  | 1-deoxy-D-xylulose-5-phosphate reductoisomerase            | 1 C11437[a] + 1 C00005[a] + 1 C00080[a] -> 1 C11434[a] + 1 C00006[a]                             | Terpenoid Backbone        | 1          | -1000 | 1000 | 0    | 1.1.1.267   |
| 1.1.1.27   | L-lactate dehydrogenase                                    | 1 C00022[c] + 1 C00004[c] + 1 C00080[c] -> 1 C00186[c] + 1 C00003[c]                             | Glycolysis                | 1          | -1000 | 1000 | 0    | 1.1.1.27    |
| 1.1.1.35a  | 3-hydroxyacyl-CoA dehydrogenase                            | 1 C04405[m] + 1 C00003[m] -> 1 C03344[m] + 1 C00004[m] + 1 C00080[m]                             | Branched Amino Acid       | 1          | -1000 | 1000 | 0    | 1.1.1.35    |
| 1.1.1.35b  | 3-hydroxyacyl-CoA dehydrogenase                            | 1 C00640[m] + 1 C00003[m] -> 1 C00264[m] + 1 C00004[m] + 1 C00080[m]                             | Beta Oxidation            | 1          | -1000 | 1000 | 0    | 1.1.1.35    |
| 1.1.1.37   | malate dehydrogenase                                       | 1 C00149[m] + 1 C00003[m] -> 1 C00036[m] + 1 C00004[m] + 1 C00080[m]                             | TCA Cycle                 | 0          | 0     | 1000 | 0    | 1.1.1.37    |
| 1.1.1.42   | isocitrate dehydrogenase (NADP+)                           | 1 C00311[m] + 1 C00006[m] -> 1 C00026[m] + 1 C00011[m] + 1 C00005[m] + 1 C00080[m]               | TCA Cycle                 | 1          | -1000 | 1000 | 0    | 1.1.1.42    |
| 1.1.1.44   | phosphogluconate dehydrogenase (decarboxylating)           | 1 C00345[c] + 1 C00006[c] -> 1 C00199[c] + 1 C00011[c] + 1 C00005[c]                             | Pentose Phosphate         | 0          | 0     | 1000 | 0    | 1.1.1.44    |
| 1.1.1.49   | glucose-6-phosphate dehydrogenase                          | 1 C00092[c] + 1 C00006[c] -> 1 C01236[c] + 1 C00005[c] + 1 C00080[c]                             | Pentose Phosphate         | 0          | 0     | 1000 | 0    | 1.1.1.49    |
| 1.1.1.8    | glycerol-3-phosphate dehydrogenase (NAD+)                  | 1 C00111[c] + 1 C00004[c] + 1 C00080[c] -> 1 C00093[c] + 1 C00003[c]                             | Phospholipid              | 1          | -1000 | 1000 | 0    | 1.1.1.8     |
| 1.1.1.95   | phosphoglycerate dehydrogenase                             | 1 C00197[c] + 1 C00003[c] -> 1 C03232[c] + 1 C00004[c] + 1 C00080[c]                             | Serine/Glycine            | 1          | -1000 | 1000 | 0    | 1.1.1.95    |
| 1.10.2.2   | ubiquinol-cytochrome-c reductase                           | 1 C00390[m] + 2 C00080[m] + 2 C00125[m] -> 1 C00399[m] + 2 C00126[m] + 4 C00080[im]              | Oxidative Phosphorylation | 0          | 0     | 1000 | 0    | 1.10.2.2    |
| 1.11.1.6   | catalase                                                   | 2 C00027[c] -> 1 C00007[c] + 2 C00001[c]                                                         | Misc                      | 0          | 0     | 1000 | 0    | 1.11.1.6    |
| 1.14.-.-   | sphingolipid delta-4 desaturase                            | 1 C12126[er] + 1 C00030[er] + 1 C00007[er] -> 1 C00195[er] + 1 C00028[er] + 2 C00001[er]         | Phospholipid              | 0          | 0     | 1000 | 0    | 1.14.-.-    |
| 1.14.16.2  | tyrosine 3-monooxygenase                                   | 1 C00082[c] + 1 C00272[c] + 1 C00007[c] -> 1 C00355[c] + 1 C15522[c]                             | Biopterin                 | 0          | 0     | 1000 | 0    | 1.14.16.2   |
| 1.14.19.2  | acyl-[acyl-carrier-protein] desaturase                     | 1 C04088[a] + 1 C00030[a] + 1 C00007[a] -> 1 C01203[a] + 1 C00028[a] + 2 C00001[a]               | Fatty Acid Synthesis      | 0          | 0     | 1000 | 0    | 1.14.19.2   |
| 1.14.19.3  | linoleoyl-CoA desaturase                                   | 1 C02050[a] + 1 C00030[a] + 1 C00007[a] -> 1 C03035[a] + 1 C00028[a] + 2 C00001[a]               | Fatty Acid Synthesis      | 0          | 0     | 1000 | 0    | 1.14.19.3   |
| 1.14.19.6  | Delta12-fatty-acyl desaturase                              | 1 C00510[a] + 1 C00030[a] + 1 C00007[a] -> 1 C02050[a] + 1 C00028[a] + 2 C00001[a]               | Fatty Acid Synthesis      | 0          | 0     | 1000 | 0    | 1.14.19.6   |
| 1.15.1.1   | superoxide dismutase                                       | 2 C00704[c] + 2 C00080[c] -> 1 C00007[c] + 1 C00027[c]                                           | Misc                      | 0          | 0     | 1000 | 0    | 1.15.1.1    |
| 1.17.1.2a  | 4-hydroxy-3-methylbut-2-enyl diphosphate reductase         | 1 C11811[a] + 1 C00005[a] + 1 C00080[a] -> 1 C00129[a] + 1 C00006[a] + 1 C00001[a]               | Terpenoid Backbone        | 0          | 0     | 1000 | 0    | 1.17.1.2    |
| 1.17.1.2b  | 4-hydroxy-3-methylbut-2-enyl diphosphate reductase         | 1 C11811[a] + 1 C00005[a] + 1 C00080[a] -> 1 C00235[a] + 1 C00006[a] + 1 C00001[a]               | Terpenoid Backbone        | 0          | 0     | 1000 | 0    | 1.17.1.2    |
| 1.17.4.1a  | ribonucleoside-diphosphate reductase                       | 1 C00342[c] + 1 C00008[c] -> 1 C00206[c] + 1 C00343[c] + 1 C00001[c]                             | Purine                    | 0          | 0     | 1000 | 0    | 1.17.4.1    |
| 1.17.4.1b  | ribonucleoside-diphosphate reductase                       | 1 C00342[c] + 1 C00015[c] -> 1 C01346[c] + 1 C00343[c] + 1 C00001[c]                             | Pyrimidine                | 0          | 0     | 1000 | 0    | 1.17.4.1    |
| 1.17.4.1c  | ribonucleoside-diphosphate reductase                       | 1 C00342[c] + 1 C00035[c] -> 1 C00361[c] + 1 C00343[c] + 1 C00001[c]                             | Purine                    | 0          | 0     | 1000 | 0    | 1.17.4.1    |
| 1.17.4.1d  | ribonucleoside-diphosphate reductase                       | 1 C00342[c] + 1 C00112[c] -> 1 C00705[c] + 1 C00343[c] + 1 C00001[c]                             | Pyrimidine                | 0          | 0     | 1000 | 0    | 1.17.4.1    |
| 1.17.7.1   | (E)-4-hydroxy-3-methylbut-2-enyl-diphosphate synthase      | 1 C11453[a] + 2 C00138[a] -> 1 C11811[a] + 1 C00001[a] + 2 C00139[a]                             | Terpenoid Backbone        | 1          | -1000 | 1000 | 0    | 1.17.7.1    |
| 1.2.1.11   | aspartate-semialdehyde dehydrogenase                       | 1 C03082[m] + 1 C00005[m] + 1 C00080[m] -> 1 C00441[m] + 1 C00009[m] + 1 C00006[m]               | Lysine                    | 1          | -1000 | 1000 | 0    | 1.2.1.11    |
| 1.2.1.12a  | glyceraldehyde-3-phosphate dehydrogenase (phosphorylating) | 1 C00118[c] + 1 C00009[c] + 1 C00003[c] -> 1 C00236[c] + 1 C00004[c] + 1 C00080[c]               | Glycolysis                | 1          | -1000 | 1000 | 0    | 1.2.1.12    |
| 1.2.1.12b  | glyceraldehyde-3-phosphate dehydrogenase (phosphorylating) | 1 C00118[a] + 1 C00009[a] + 1 C00003[a] -> 1 C00236[a] + 1 C00004[a] + 1 C00080[a]               | Glycolysis                | 1          | -1000 | 1000 | 0    | 1.2.1.12    |
| 1.2.1.27   | methylmalonate-semialdehyde dehydrogenase (acylating)      | 1 C00349[m] + 1 C00010[m] + 1 C00001[m] + 1 C00003[m] -> 1 C00100[m] + 1 C00028[m] + 1 C00004[m] | Branched Amino Acid       | 1          | -1000 | 1000 | 0    | 1.2.1.27    |
| 1.2.1.3a   | aldehyde dehydrogenase (NAD+)                              | 1 C00084[c] + 1 C00003[c] + 1 C00001[c] -> 1 C00033[c] + 1 C00004[c] + 1 C00080[c]               | Glycolysis                | 0          | 0     | 1000 | 0    | 1.2.1.3     |
| 1.2.1.3b   | aldehyde dehydrogenase (NAD+)                              | 1 C05665[c] + 1 C00003[c] + 1 C00001[c] -> 1 C00099[c] + 1 C00004[c] + 1 C00080[c]               | Beta-Alanine              | 0          | 0     | 1000 | 0    | 1.2.1.3     |
| 1.2.1.3c   | aldehyde dehydrogenase (NAD+)                              | 1 C00555[c] + 1 C00003[c] + 1 C00001[c] -> 1 C00334[c] + 1 C00004[c] + 1 C00080[c]               | Beta-Alanine              | 0          | 0     | 1000 | 0    | 1.2.1.3     |
| 1.2.1.41   | glutamate-5-semialdehyde dehydrogenase                     | 1 C01165[c] + 1 C00009[c] + 1 C00006[c] -> 1 C03287[c] + 1 C00005[c] + 1 C00080[c]               | Arginine/Proline          | 1          | -1000 | 1000 | 0    | 1.2.1.41    |
| 1.2.4.1    | pyruvate dehydrogenase (acetyl-transferring)               | 1 C00022[a] + 1 C16237[a] -> 1 C16255[a] + 1 C00011[a]                                           | Glycolysis                | 0          | 0     | 1000 | 0    | 1.2.4.1     |
| 1.2.4.2    | oxoglutarate dehydrogenase (succinyl-transferring)         | 1 C00026[m] + 1 C16237[m] -> 1 C16254[m] + 1 C00011[m]                                           | TCA Cycle                 | 0          | 0     | 1000 | 0    | 1.2.4.2     |
| 1.2.4.4a   | 3-methyl-2-oxobutanoate dehydrogenase                      | 1 C00141[m] + 1 C16237[m] -> 1 C15977[m] + 1 C00011[m]                                           | Branched Amino Acid       | 0          | 0     | 1000 | 0    | 1.2.4.4     |
| 1.2.4.4b   | 3-methyl-2-oxobutanoate dehydrogenase                      | 1 C00233[m] + 1 C16237[m] -> 1 C15975[m] + 1 C00011[m]                                           | Branched Amino Acid       | 0          | 0     | 1000 | 0    | 1.2.4.4     |
| 1.2.4.4c   | 3-methyl-2-oxobutanoate dehydrogenase                      | 1 C00671[m] + 1 C16237[m] -> 1 C15979[m] + 1 C00011[m]                                           | Branched Amino Acid       | 0          | 0     | 1000 | 0    | 1.2.4.4     |
| 1.3.1.26   | dihydrodipicolinate reductase                              | 1 C03340[m] + 1 C00004[m] + 1 C00080[m] -> 1 C03972[m] + 1 C00003[m]                             | Lysine                    | 1          | -1000 | 1000 | 0    | 1.3.1.26    |
| 1.3.1.9a   | enoyl-[acp] reductase (NADH)                               | 1 C05758[a] + 1 C00004[a] + 1 C00080[a] -> 1 C05223[a] + 1 C00003[a]                             | Fatty Acid Synthesis      | 1          | -1000 | 1000 | 0    | 1.3.1.9     |
| 1.3.1.9b   | enoyl-[acp] reductase (NADH)                               | 1 C05748[a] + 1 C00004[a] + 1 C00080[a] -> 1 C05749[a] + 1 C00003[a]                             | Fatty Acid Synthesis      | 1          | -1000 | 1000 | 0    | 1.3.1.9     |
| 1.3.1.9c   | enoyl-[acp] reductase (NADH)                               | 1 C05751[a] + 1 C00004[a] + 1 C00080[a] -> 1 C05752[a] + 1 C00003[a]                             | Fatty Acid Synthesis      | 1          | -1000 | 1000 | 0    | 1.3.1.9     |
| 1.3.1.9d   | enoyl-[acp] reductase (NADH)                               | 1 C05754[a] + 1 C00004[a] + 1 C00080[a] -> 1 C05755[a] + 1 C00003[a]                             | Fatty Acid Synthesis      | 1          | -1000 | 1000 | 0    | 1.3.1.9     |
| 1.3.1.9e   | enoyl-[acp] reductase (NADH)                               | 1 C05760[a] + 1 C00004[a] + 1 C00080[a] -> 1 C05761[a] + 1 C00003[a]                             | Fatty Acid Synthesis      | 1          | -1000 | 1000 | 0    | 1.3.1.9     |
| 1.3.1.9f   | enoyl-[acp] reductase (NADH)                               | 1 C05763[a] + 1 C00004[a] + 1 C00080[a] -> 1 C05764[a] + 1 C00003[a]                             | Fatty Acid Synthesis      | 1          | -1000 | 1000 | 0    | 1.3.1.9     |
| 1.3.1.9g   | enoyl-[acp] reductase (NADH)                               | 1 C04246[a] + 1 C00004[a] + 1 C00080[a] -> 1 C05745[a] + 1 C00003[a]                             | Fatty Acid Synthesis      | 1          | -1000 | 1000 | 0    | 1.3.1.9     |
| 1.3.1.9h   | enoyl-[acp] reductase (NADH)                               | 1 C16221[a] + 1 C00004[a] + 1 C00080[a] -> 1 C04088[a] + 1 C00003[a]                             | Fatty Acid Synthesis      | 1          | -1000 | 1000 | 0    | 1.3.1.9     |
| 1.3.3.1    | dihydroorotate oxidase                                     | 1 C00337[m] + 1 C00007[m] -> 1 C00295[m] + 1 C00027[m]                                           | Pyrimidine                | 1          | -1000 | 1000 | 0    | 1.3.3.1     |
| 1.3.3.3    | coproporphyrinogen oxidase                                 | 1 C03263[c] + 1 C00007[c] + 2 C00080[c] -> 1 C01079[c] + 2 C00011[c] + 2 C00001[c]               | Porphyrin                 | 0          | 0     | 1000 | 0    | 1.3.3.3     |

|            |                                                                    |                                                                                                  |                           |   |       |      |   |           |
|------------|--------------------------------------------------------------------|--------------------------------------------------------------------------------------------------|---------------------------|---|-------|------|---|-----------|
| 1.3.3.4    | protoporphyrinogen oxidase                                         | 1 C01079[m] + 3 C00007[m] -> 1 C02191[m] + 3 C00027[m]                                           | Porphyrin                 | 0 | 0     | 1000 | 0 | 1.3.3.4   |
| 1.3.3.6    | acyl-CoA oxidase                                                   | 1 C00040[m] + 1 C00007[m] -> 1 C00658[m] + 1 C00027[m]                                           | Beta Oxidation            | 0 | 0     | 1000 | 0 | 1.3.3.6   |
| 1.3.5.1    | succinate dehydrogenase (ubiquinone)                               | 1 C00042[m] + 1 C00399[m] -> 1 C00122[m] + 1 C00390[m]                                           | TCA Cycle                 | 0 | 0     | 1000 | 0 | 1.3.5.1   |
| 1.3.99.10  | isovaleryl-CoA dehydrogenase                                       | 1 C02939[m] + 1 C00016[m] -> 1 C03069[m] + 1 C01352[m]                                           | Branched Amino Acid       | 0 | 0     | 1000 | 0 | 1.3.99.10 |
| 1.3.99.2a  | butyryl-CoA dehydrogenase                                          | 1 C00630[m] + 1 C00016[m] -> 1 C03460[m] + 1 C01352[m]                                           | Branched Amino Acid       | 0 | 0     | 1000 | 0 | 1.3.99.2  |
| 1.3.99.2b  | butyryl-CoA dehydrogenase                                          | 1 C15980[m] + 1 C00016[m] -> 1 C03345[m] + 1 C01352[m]                                           | Branched Amino Acid       | 0 | 0     | 1000 | 0 | 1.3.99.2  |
| 1.4.1.1    | alanine dehydrogenase                                              | 1 C00022[c] + 1 C00014[c] + 1 C00004[c] + 1 C00080[c] -> 1 C00041[c] + 1 C00001[c] + 1 C00003[c] | Glutamate/Glutamine       | 1 | -1000 | 1000 | 0 | 1.4.1.1   |
| 1.4.1.2    | glutamate dehydrogenase                                            | 1 C00025[m] + 1 C00001[m] + 1 C00003[m] -> 1 C00026[m] + 1 C00014[m] + 1 C00004[m] + 1 C00080[m] | Glutamate/Glutamine       | 1 | -1000 | 1000 | 0 | 1.4.1.2   |
| 1.4.1.4    | glutamate dehydrogenase (NADP+)                                    | 1 C00025[c] + 1 C00001[c] + 1 C00006[c] -> 1 C00026[c] + 1 C00014[c] + 1 C00005[c] + 1 C00080[c] | Glutamate/Glutamine       | 1 | -1000 | 1000 | 0 | 1.4.1.4   |
| 1.4.3.21   | primary-amine oxidase                                              | 1 C00986[c] + 1 C00007[c] + 1 C00001[c] -> 1 C05665[c] + 1 C00014[c] + 1 C00027[c]               | Beta-Alanine              | 0 | 0     | 1000 | 0 | 1.4.3.21  |
| 1.4.4.2    | glycine dehydrogenase (decarboxylating)                            | 1 C00037[m] + 1 C16237[m] -> 1 C01242[m] + 1 C00011[m]                                           | Serine/Glycine            | 1 | -1000 | 1000 | 0 | 1.4.4.2   |
| 1.5.1.12a  | 1-pyrroline-5-carboxylate dehydrogenase                            | 1 C00025[c] + 1 C00004[c] + 1 C00080[c] -> 1 C03912[c] + 1 C00003[c] + 2 C00001[c]               | Arginine/Proline          | 1 | -1000 | 1000 | 0 | 1.5.1.12  |
| 1.5.1.12b  | 1-pyrroline-5-carboxylate dehydrogenase                            | 1 C01165[c] + 1 C00003[c] + 1 C00001[c] -> 1 C00025[c] + 1 C00004[c] + 1 C00080[c]               | Arginine/Proline          | 1 | -1000 | 1000 | 0 | 1.5.1.12  |
| 1.5.1.2    | pyrroline-5-carboxylate reductase                                  | 1 C03912[c] + 1 C00004[c] + 1 C00080[c] -> 1 C00148[c] + 1 C00003[c]                             | Arginine/Proline          | 1 | -1000 | 1000 | 0 | 1.5.1.2   |
| 1.5.1.3a   | dihydrofolate reductase                                            | 1 C00415[c] + 1 C00004[c] + 1 C00080[c] -> 1 C00101[c] + 1 C00003[c]                             | Folate                    | 1 | -1000 | 1000 | 0 | 1.5.1.3   |
| 1.5.1.3b   | dihydrofolate reductase                                            | 1 C00504[c] + 1 C00004[c] + 1 C00080[c] -> 1 C00415[c] + 1 C00003[c]                             | Folate                    | 1 | -1000 | 1000 | 0 | 1.5.1.3   |
| 1.5.1.34   | 6,7-dihydropteridine reductase                                     | 1 C00272[c] + 1 C00003[c] -> 1 C00268[c] + 1 C00004[c] + 1 C00080[c]                             | Biopterin                 | 1 | -1000 | 1000 | 0 | 1.5.1.34  |
| 1.5.3.13a  | N1-acetylpolyamine oxidase                                         | 1 C00612[c] + 1 C00007[c] + 1 C00001[c] -> 1 C00134[c] + 1 C18170[c] + 1 C00027[c]               | Polyamines                | 0 | 0     | 1000 | 0 | 1.5.3.13  |
| 1.5.3.13b  | N1-acetylpolyamine oxidase                                         | 1 C02567[c] + 1 C00007[c] + 1 C00001[c] -> 1 C00315[c] + 1 C18170[c] + 1 C00027[c]               | Polyamines                | 0 | 0     | 1000 | 0 | 1.5.3.13  |
| 1.5.5.1    | electron-transferring-flavoprotein dehydrogenase                   | 1 C00016[m] + 1 C00390[m] -> 1 C01352[m] + 1 C00399[m]                                           | Oxidative Phosphorylation | 1 | -1000 | 1000 | 0 | 1.5.5.1   |
| 1.5.99.6   | spermidine dehydrogenase                                           | 1 C00315[c] + 1 C00007[c] + 1 C00001[c] -> 1 C00986[c] + 1 C00555[c] + 1 C00027[c]               | Beta-Alanine              | 0 | 0     | 1000 | 0 | 1.5.99.6  |
| 1.6.2.4    | NADPH-hemoprotein reductase                                        | 1 C00005[m] + 1 C00080[m] + 1 C00125[m] -> 1 C00006[m] + 1 C00126[m]                             | Oxidative Phosphorylation | 1 | -1000 | 1000 | 0 | 1.6.2.4   |
| 1.6.5.3    | NADH dehydrogenase (ubiquinone)                                    | 1 C00004[m] + 5 C00080[m] + 1 C00399[m] -> 1 C00003[m] + 4 C00080[im] + 1 C00390[m]              | Oxidative Phosphorylation | 0 | 0     | 1000 | 0 | 1.6.5.3   |
| 1.8.1.4a   | dihydrolipoyl dehydrogenase                                        | 1 C16832[a] + 1 C00003[a] -> 1 C16237[a] + 1 C00004[a] + 1 C00080[a]                             | Currency Exchange         | 1 | -1000 | 1000 | 0 | 1.8.1.4   |
| 1.8.1.4b   | dihydrolipoyl dehydrogenase                                        | 1 C16832[m] + 1 C00003[m] -> 1 C16237[m] + 1 C00004[m] + 1 C00080[m]                             | Currency Exchange         | 1 | -1000 | 1000 | 0 | 1.8.1.4   |
| 1.8.1.7    | glutathione-disulfide reductase                                    | 2 C00051[c] + 1 C00003[c] -> 1 C00127[c] + 1 C00004[c] + 1 C00080[c]                             | Currency Exchange         | 0 | 0     | 1000 | 0 | 1.8.1.7   |
| 1.8.1.9    | thioredoxin-disulfide reductase                                    | 1 C00343[c] + 1 C00005[c] + 1 C00080[c] -> 1 C00342[c] + 1 C00006[c]                             | Currency Exchange         | 0 | 0     | 1000 | 0 | 1.8.1.9   |
| 1.8.3.1    | sulfite oxidase                                                    | 1 C00094[c] + 1 C00007[c] + 1 C00001[c] -> 1 C00059[c] + 1 C00027[c]                             | Sulfur                    | 0 | 0     | 1000 | 0 | 1.8.3.1   |
| 1.8.4.9    | adenyllyl-sulfate reductase (glutathione)                          | 1 C00020[c] + 1 C00094[c] + 1 C00127[c] -> 1 C00224[c] + 2 C00051[c]                             | Sulfur                    | 0 | 0     | 1000 | 0 | 1.8.4.9   |
| 1.9.3.1    | cytochrome-c oxidase                                               | 4 C00126[m] + 1 C00007[m] + 8 C00080[m] -> 4 C00125[m] + 4 C00080[im] + 2 C00001[m]              | Oxidative Phosphorylation | 0 | 0     | 1000 | 0 | 1.9.3.1   |
| 2.1.1.10   | homocysteine S-methyltransferase                                   | 1 C00019[c] + 1 C00155[c] -> 1 C00021[c] + 1 C00073[c]                                           | Cysteine/Methionine       | 0 | 0     | 1000 | 0 | 2.1.1.10  |
| 2.1.1.45   | thymidylate synthase                                               | 1 C00143[c] + 1 C00365[c] -> 1 C00415[c] + 1 C00364[c]                                           | Pyrimidine                | 0 | 0     | 1000 | 0 | 2.1.1.45  |
| 2.1.2.1    | glycine hydroxymethyltransferase                                   | 1 C00101[m] + 1 C00065[m] -> 1 C00143[m] + 1 C00037[m] + 1 C00001[m]                             | Serine/Glycine            | 0 | 0     | 1000 | 0 | 2.1.2.1   |
| 2.1.2.10   | aminomethyltransferase                                             | 1 C01242[m] + 1 C00101[m] -> 1 C16832[m] + 1 C00143[m] + 1 C00014[m]                             | Serine/Glycine            | 0 | 0     | 1000 | 0 | 2.1.2.10  |
| 2.1.2.11   | 3-methyl-2-oxobutanoate hydroxymethyltransferase                   | 1 C00143[m] + 1 C00141[m] + 1 C00001[m] -> 1 C00101[m] + 1 C00966[m]                             | CoA Synthesis             | 0 | 0     | 1000 | 0 | 2.1.2.11  |
| 2.1.3.2    | aspartate carbamoyltransferase                                     | 1 C00169[c] + 1 C00049[c] -> 1 C00009[c] + 1 C00438[c]                                           | Pyrimidine                | 0 | 0     | 1000 | 0 | 2.1.3.2   |
| 2.1.3.3    | ornithine carbamoyltransferase                                     | 1 C00009[c] + 1 C00327[c] -> 1 C00169[c] + 1 C00077[c]                                           | Arginine/Proline          | 1 | -1000 | 1000 | 0 | 2.1.3.3   |
| 2.2.1.1a   | transketolase                                                      | 1 C05382[c] + 1 C00118[c] -> 1 C00117[c] + 1 C00231[c]                                           | Pentose Phosphate         | 1 | -1000 | 1000 | 0 | 2.2.1.1   |
| 2.2.1.1b   | transketolase                                                      | 1 C00279[c] + 1 C00231[c] -> 1 C00085[c] + 1 C00118[c]                                           | Pentose Phosphate         | 1 | -1000 | 1000 | 0 | 2.2.1.1   |
| 2.2.1.2    | transaldolase                                                      | 1 C05382[c] + 1 C00118[c] -> 1 C00279[c] + 1 C00085[c]                                           | Glycolysis                | 1 | -1000 | 1000 | 0 | 2.2.1.2   |
| 2.2.1.7    | 1-deoxy-D-xylulose-5-phosphate synthase                            | 1 C00022[a] + 1 C00118[a] -> 1 C11437[a] + 1 C00011[a]                                           | Terpenoid Backbone        | 0 | 0     | 1000 | 0 | 2.2.1.7   |
| 2.3.1.117  | 2,3,4,5-tetrahydropyridine-2,6-dicarboxylate N-succinyltransferase | 1 C00091[m] + 1 C03972[m] + 1 C00001[m] -> 1 C00010[m] + 1 C04462[m]                             | Lysine                    | 0 | 0     | 1000 | 0 | 2.3.1.117 |
| 2.3.1.12   | dihydrolipoyllysine-residue acetyltransferase                      | 1 C00010[a] + 1 C16255[a] -> 1 C00024[a] + 1 C16832[a]                                           | Glycolysis                | 1 | -1000 | 1000 | 0 | 2.3.1.12  |
| 2.3.1.15   | glycerol-3-phosphate O-acyltransferase                             | 1 C00040[er] + 1 C00093[er] -> 1 C00010[er] + 1 C00681[er]                                       | Phospholipid              | 1 | -1000 | 1000 | 0 | 2.3.1.15  |
| 2.3.1.16a  | acetyl-CoA C-acyltransferase                                       | 1 C00100[m] + 1 C00024[m] -> 1 C00010[m] + 1 C03344[m]                                           | Branched Amino Acid       | 1 | -1000 | 1000 | 0 | 2.3.1.16  |
| 2.3.1.16b  | Acetyl-CoA C-acyltransferase                                       | 1 C00040[m] + 1 C00024[m] -> 1 C00010[m] + 1 C00264[m]                                           | Beta oxidation            | 1 | -1000 | 1000 | 0 | 2.3.1.16  |
| 2.3.1.168a | dihydrolipoyllysine-residue (2-methylpropanoyl)transferase         | 1 C00010[m] + 1 C15977[m] -> 1 C00630[m] + 1 C16832[m]                                           | Branched Amino Acid       | 0 | 0     | 1000 | 0 | 2.3.1.168 |
| 2.3.1.168b | dihydrolipoyllysine-residue (2-methylpropanoyl)transferase         | 1 C00010[m] + 1 C15979[m] -> 1 C15980[m] + 1 C16832[m]                                           | Branched Amino Acid       | 0 | 0     | 1000 | 0 | 2.3.1.168 |
| 2.3.1.168c | dihydrolipoyllysine-residue (2-methylpropanoyl)transferase         | 1 C00010[m] + 1 C15975[m] -> 1 C02939[m] + 1 C16832[m]                                           | Branched Amino Acid       | 0 | 0     | 1000 | 0 | 2.3.1.168 |
| 2.3.1.180  | beta-ketoacyl-acyl-carrier-protein synthase III                    | 1 C00024[a] + 1 C01209[a] -> 1 C05744[a] + 1 C00010[a] + 1 C00011[a]                             | Fatty Acid Synthesis      | 0 | 0     | 1000 | 0 | 2.3.1.180 |
| 2.3.1.24   | sphingosine N-acyltransferase                                      | 1 C00040[er] + 1 C00836[er] -> 1 C00010[er] + 1 C12126[er]                                       | Phospholipid              | 0 | 0     | 1000 | 0 | 2.3.1.24  |
| 2.3.1.31   | homoserine O-acetyltransferase                                     | 1 C00024[c] + 1 C00263[c] -> 1 C00010[c] + 1 C01077[c]                                           | Cysteine/Methionine       | 0 | 0     | 1000 | 0 | 2.3.1.31  |
| 2.3.1.37   | 5-aminolevulinat synthase                                          | 1 C00091[m] + 1 C00037[m] -> 1 C00430[m] + 1 C00010[m] + 1 C00011[m]                             | Porphyrin                 | 0 | 0     | 1000 | 0 | 2.3.1.37  |
| 2.3.1.39   | [acp] S-malonyltransferase                                         | 1 C00083[a] + 1 C00229[a] -> 1 C00010[a] + 1 C01209[a]                                           | Fatty Acid Synthesis      | 1 | -1000 | 1000 | 0 | 2.3.1.39  |
| 2.3.1.4    | glucosamine-phosphate N-acetyltransferase                          | 1 C00024[c] + 1 C00352[c] -> 1 C00010[c] + 1 C00357[c]                                           | Amino Sugar               | 0 | 0     | 1000 | 0 | 2.3.1.4   |
| 2.3.1.41a  | beta-ketoacyl-acyl-carrier-protein synthase I                      | 1 C05223[a] + 1 C01209[a] -> 1 C05759[a] + 1 C00011[a] + 1 C00229[a]                             | Fatty Acid Synthesis      | 0 | 0     | 1000 | 0 | 2.3.1.41  |
| 2.3.1.41b  | beta-ketoacyl-acyl-carrier-protein synthase I                      | 1 C05745[a] + 1 C01209[a] -> 1 C05746[a] + 1 C00011[a] + 1 C00229[a]                             | Fatty Acid Synthesis      | 0 | 0     | 1000 | 0 | 2.3.1.41  |
| 2.3.1.41c  | beta-ketoacyl-acyl-carrier-protein synthase I                      | 1 C05749[a] + 1 C01209[a] -> 1 C05750[a] + 1 C00011[a] + 1 C00229[a]                             | Fatty Acid Synthesis      | 0 | 0     | 1000 | 0 | 2.3.1.41  |
| 2.3.1.41d  | beta-ketoacyl-acyl-carrier-protein synthase I                      | 1 C05752[a] + 1 C01209[a] -> 1 C05753[a] + 1 C00011[a] + 1 C00229[a]                             | Fatty Acid Synthesis      | 0 | 0     | 1000 | 0 | 2.3.1.41  |
| 2.3.1.41e  | beta-ketoacyl-acyl-carrier-protein synthase I                      | 1 C05755[a] + 1 C01209[a] -> 1 C05756[a] + 1 C00011[a] + 1 C00229[a]                             | Fatty Acid Synthesis      | 0 | 0     | 1000 | 0 | 2.3.1.41  |
| 2.3.1.41f  | beta-ketoacyl-acyl-carrier-protein synthase I                      | 1 C05761[a] + 1 C01209[a] -> 1 C05762[a] + 1 C00011[a] + 1 C00229[a]                             | Fatty Acid Synthesis      | 0 | 0     | 1000 | 0 | 2.3.1.41  |
| 2.3.1.41g  | beta-ketoacyl-acyl-carrier-protein synthase I                      | 1 C05764[a] + 1 C01209[a] -> 1 C16219[a] + 1 C00011[a] + 1 C00229[a]                             | Fatty Acid Synthesis      | 0 | 0     | 1000 | 0 | 2.3.1.41  |
| 2.3.1.50   | serine C-palmitoyltransferase                                      | 1 C00154[er] + 1 C00065[er] -> 1 C00010[er] + 1 C02934[er] + 1 C00011[er]                        | Phospholipid              | 0 | 0     | 1000 | 0 | 2.3.1.50  |
| 2.3.1.51   | 1-acylglycerol-3-phosphate O-acyltransferase                       | 1 C00040[er] + 1 C00681[er] -> 1 C00010[er] + 1 C00416[er]                                       | Phospholipid              | 0 | 0     | 1000 | 0 | 2.3.1.51  |
| 2.3.1.57a  | diamine N-acetyltransferase                                        | 1 C00024[c] + 1 C00750[c] -> 1 C00010[c] + 1 C02567[c]                                           | Polyamines                | 0 | 0     | 1000 | 0 | 2.3.1.57  |

|           |                                                           |                                                                                                                   |                      |   |       |      |             |
|-----------|-----------------------------------------------------------|-------------------------------------------------------------------------------------------------------------------|----------------------|---|-------|------|-------------|
| 2.3.1.57b | diamine N-acetyltransferase                               | 1 C00024[c] + 1 C00315[c] -> 1 C00010[c] + 1 C00612[c]                                                            | Polyamines           | 0 | 0     | 1000 | 0 2.3.1.57  |
| 2.3.1.57c | diamine N-acetyltransferase                               | 1 C00024[c] + 1 C00134[c] -> 1 C00010[c] + 1 C02714[c]                                                            | Polyamines           | 0 | 0     | 1000 | 0 2.3.1.57  |
| 2.3.1.61  | dihydrolipoyllysine-residue succinyltransferase           | 1 C00010[m] + 1 C16254[m] -> 1 C00091[m] + 1 C16832[m]                                                            | TCA Cycle            | 1 | -1000 | 1000 | 0 2.3.1.61  |
| 2.3.1.8   | phosphate acetyltransferase                               | 1 C00024[c] + 1 C00009[c] -> 1 C00010[c] + 1 C00227[c]                                                            | Misc                 | 1 | -1000 | 1000 | 0 2.3.1.8   |
| 2.3.1.85  | fatty acid synthase I                                     | 1 C00024[c] + 8 C00083[c] + 16 C00005[c] + 16 C00080[c] -> 1 C00154[c] + 8 C00010[c] + 8 C00011[c] + 16 C00006[c] | Fatty Acid Synthesis | 0 | 0     | 1000 | 0 2.3.1.85  |
| 2.3.1.9   | acetyl-CoA C-acetyltransferase                            | 1 C00010[m] + 1 C00332[m] -> 2 C00024[m]                                                                          | Beta Oxidation       | 1 | -1000 | 1000 | 0 2.3.1.9   |
| 2.3.3.1   | citrate (S)-synthase                                      | 1 C00024[m] + 1 C00001[m] + 1 C00036[m] -> 1 C00158[m] + 1 C00010[m]                                              | TCA Cycle            | 0 | 0     | 1000 | 0 2.3.3.1   |
| 2.3.3.5   | 2-methylcitrate synthase                                  | 1 C00100[m] + 1 C00001[m] + 1 C00036[m] -> 1 C02225[m] + 1 C00010[m]                                              | MC Cycle             | 0 | 0     | 1000 | 0 2.3.3.5   |
| 2.3.3.8   | ATP citrate synthase                                      | 1 C00002[c] + 1 C00158[c] + 1 C00010[c] -> 1 C00008[c] + 1 C00009[c] + 1 C00024[c] + 1 C00036[c]                  | TCA Cycle            | 0 | 0     | 1000 | 0 2.3.3.8   |
| 2.4.1.198 | phosphatidylinositol N-acetylglucosaminyltransferase      | 1 C00043[er] + 1 C01194[er] -> 1 C00015[er] + 1 C01288[er]                                                        | Phospholipid         | 0 | 0     | 1000 | 0 2.4.1.198 |
| 2.4.1.83  | dolichyl-phosphate beta-D-mannosyltransferase             | 1 C00096[c] + 1 C00110[c] -> 1 C00035[c] + 1 C03862[c]                                                            | Amino Sugar          | 0 | 0     | 1000 | 0 2.4.1.83  |
| 2.4.2.1a  | purine-nucleoside phosphorylase                           | 1 C00212[c] + 1 C00009[c] -> 1 C00147[c] + 1 C00620[c]                                                            | Purine               | 1 | -1000 | 1000 | 0 2.4.2.1   |
| 2.4.2.1b  | purine-nucleoside phosphorylase                           | 1 C00294[c] + 1 C00009[c] -> 1 C00262[c] + 1 C00620[c]                                                            | Purine               | 1 | -1000 | 1000 | 0 2.4.2.1   |
| 2.4.2.1c  | purine-nucleoside phosphorylase                           | 1 C00387[c] + 1 C00009[c] -> 1 C00242[c] + 1 C00620[c]                                                            | Purine               | 1 | -1000 | 1000 | 0 2.4.2.1   |
| 2.4.2.1d  | purine-nucleoside phosphorylase                           | 1 C01762[c] + 1 C00009[c] -> 1 C00385[c] + 1 C00620[c]                                                            | Purine               | 1 | -1000 | 1000 | 0 2.4.2.1   |
| 2.4.2.1e  | purine-nucleoside phosphorylase                           | 1 C00330[c] + 1 C00009[c] -> 1 C00242[c] + 1 C00672[c]                                                            | Purine               | 1 | -1000 | 1000 | 0 2.4.2.1   |
| 2.4.2.1f  | purine-nucleoside phosphorylase                           | 1 C03150[c] + 1 C00009[c] -> 1 C00153[c] + 1 C00620[c]                                                            | Nicotinate           | 1 | -1000 | 1000 | 0 2.4.2.1   |
| 2.4.2.1g  | purine-nucleoside phosphorylase                           | 1 C05841[c] + 1 C00009[c] -> 1 C00253[c] + 1 C00620[c] + 1 C00080[c]                                              | Nicotinate           | 1 | -1000 | 1000 | 0 2.4.2.1   |
| 2.4.2.1h  | purine-nucleoside phosphorylase                           | 1 C00526[c] + 1 C00009[c] -> 1 C00106[c] + 1 C00672[c]                                                            | Pyrimidine           | 1 | -1000 | 1000 | 0 2.4.2.1   |
| 2.4.2.1i  | purine-nucleoside phosphorylase                           | 1 C00559[c] + 1 C00009[c] -> 1 C00147[c] + 1 C00672[c]                                                            | Purine               | 1 | -1000 | 1000 | 0 2.4.2.1   |
| 2.4.2.1j  | purine-nucleoside phosphorylase                           | 1 C05512[c] + 1 C00009[c] -> 1 C00262[c] + 1 C00672[c]                                                            | Purine               | 1 | -1000 | 1000 | 0 2.4.2.1   |
| 2.4.2.10  | orotate phosphoribosyltransferase                         | 1 C00295[c] + 1 C00119[c] -> 1 C01103[c] + 1 C00013[c]                                                            | Pyrimidine           | 1 | -1000 | 1000 | 0 2.4.2.10  |
| 2.4.2.11  | nicotinate phosphoribosyltransferase                      | 1 C01185[c] + 1 C00013[c] -> 1 C00253[c] + 1 C00119[c]                                                            | Nicotinate           | 1 | -1000 | 1000 | 0 2.4.2.11  |
| 2.4.2.8a  | hypoxanthine phosphoribosyltransferase                    | 1 C00130[c] + 1 C00013[c] -> 1 C00119[c] + 1 C00262[c]                                                            | Purine               | 1 | -1000 | 1000 | 0 2.4.2.8   |
| 2.4.2.8b  | hypoxanthine phosphoribosyltransferase                    | 1 C00020[c] + 1 C00013[c] -> 1 C00119[c] + 1 C00147[c]                                                            | Purine               | 0 | 0     | 1000 | 0 2.4.2.8   |
| 2.4.2.8c  | hypoxanthine phosphoribosyltransferase                    | 1 C00144[c] + 1 C00013[c] -> 1 C00119[c] + 1 C00242[c]                                                            | Purine               | 1 | -1000 | 1000 | 0 2.4.2.8   |
| 2.4.2.8d  | hypoxanthine phosphoribosyltransferase                    | 1 C00655[c] + 1 C00013[c] -> 1 C00119[c] + 1 C00385[c]                                                            | Purine               | 1 | -1000 | 1000 | 0 2.4.2.8   |
| 2.4.2.9   | uracil phosphoribosyltransferase                          | 1 C00105[c] + 1 C00013[c] -> 1 C00106[c] + 1 C00119[c]                                                            | Pyrimidine           | 1 | -1000 | 1000 | 0 2.4.2.9   |
| 2.5.1.1   | dimethylallyltransferase                                  | 1 C00235[m] + 1 C00129[m] -> 1 C00013[m] + 1 C00341[m]                                                            | Terpenoid Backbone   | 0 | 0     | 1000 | 0 2.5.1.1   |
| 2.5.1.10  | geranyltransferase                                        | 1 C00341[m] + 1 C00129[m] -> 1 C00013[m] + 1 C00448[m]                                                            | Terpenoid Backbone   | 0 | 0     | 1000 | 0 2.5.1.10  |
| 2.5.1.15a | dihydropteroate synthase                                  | 1 C04807[c] + 1 C00568[c] -> 1 C00013[c] + 1 C00921[c]                                                            | Folate               | 0 | 0     | 1000 | 0 2.5.1.15  |
| 2.5.1.15b | dihydropteroate synthase                                  | 1 C01300[c] + 1 C00568[c] -> 1 C00001[c] + 1 C00921[c]                                                            | Folate               | 0 | 0     | 1000 | 0 2.5.1.15  |
| 2.5.1.19  | 3-phosphoshikimate 1-carboxyvinyltransferase              | 1 C00074[c] + 1 C03175[c] -> 1 C00009[c] + 1 C01269[c]                                                            | Shikimate            | 1 | -1000 | 1000 | 0 2.5.1.19  |
| 2.5.1.29  | farnesyltransferase                                       | 1 C00448[m] + 1 C00129[m] -> 1 C00013[m] + 1 C00353[m]                                                            | Terpenoid Backbone   | 0 | 0     | 1000 | 0 2.5.1.29  |
| 2.5.1.31a | di-trans,poly-cis-decaprenylcistransferase                | 1 C00448[m] + 1 C00129[m] -> 1 C11356[m] + 1 C00013[m]                                                            | Terpenoid Backbone   | 0 | 0     | 1000 | 0 2.5.1.31  |
| 2.5.1.31b | di-trans,poly-cis-decaprenylcistransferase                | 1 C11356[m] + 7 C00129[m] -> 1 C04574[m] + 7 C00013[m]                                                            | Terpenoid Backbone   | 0 | 0     | 1000 | 0 2.5.1.31  |
| 2.5.1.54  | 3-deoxy-7-phosphoheptulonate synthase                     | 1 C00074[c] + 1 C00279[c] + 1 C00001[c] -> 1 C04691[c] + 1 C00009[c]                                              | Shikimate            | 0 | 0     | 1000 | 0 2.5.1.54  |
| 2.5.1.6   | methionine adenosyltransferase                            | 1 C00002[c] + 1 C00073[c] + 1 C00001[c] -> 1 C00009[c] + 1 C00013[c] + 1 C00019[c]                                | Cysteine/Methionine  | 0 | 0     | 1000 | 0 2.5.1.6   |
| 2.5.1.61  | hydroxymethylbilane synthase                              | 4 C00931[a] + 1 C00001[a] -> 1 C01024[a] + 4 C00014[a]                                                            | Porphyrin            | 0 | 0     | 1000 | 0 2.5.1.61  |
| 2.6.99.2  | pyridoxal 5-phosphate synthase                            | 1 C00118[c] + 1 C00117[c] + 1 C00064[c] -> 1 C00018[c] + 1 C00025[c] + 1 C00009[c] + 3 C00001[c]                  | Misc                 | 0 | 0     | 1000 | 0 2.6.99.2  |
| 2.6.1.1a  | aspartate transaminase                                    | 1 C00049[c] + 1 C00026[c] -> 1 C00036[c] + 1 C00025[c]                                                            | Glutamate/Glutamine  | 1 | -1000 | 1000 | 0 2.6.1.1   |
| 2.6.1.1b  | aspartate transaminase                                    | 1 C00097[c] + 1 C00026[c] -> 1 C00957[c] + 1 C00025[c]                                                            | Cysteine/Methionine  | 1 | -1000 | 1000 | 0 2.6.1.1   |
| 2.6.1.13  | ornithine aminotransferase                                | 1 C00077[c] + 1 C00026[c] -> 1 C01165[c] + 1 C00025[c]                                                            | Arginine/Proline     | 1 | -1000 | 1000 | 0 2.6.1.13  |
| 2.6.1.16  | glutamine-fructose-6-phosphate transaminase (isomerizing) | 1 C00064[c] + 1 C00085[c] -> 1 C00025[c] + 1 C00352[c]                                                            | Amino Sugar          | 1 | -1000 | 1000 | 0 2.6.1.16  |
| 2.6.1.17  | succinyldiaminopimelate transaminase                      | 1 C04462[m] + 1 C00025[m] -> 1 C04421[m] + 1 C00026[m]                                                            | Lysine               | 1 | -1000 | 1000 | 0 2.6.1.17  |
| 2.6.1.42a | branched-chain-amino-acid transaminase                    | 1 C00123[m] + 1 C00026[m] -> 1 C00233[m] + 1 C00025[m]                                                            | Branched Amino Acid  | 1 | -1000 | 1000 | 0 2.6.1.42  |
| 2.6.1.42b | branched-chain-amino-acid transaminase                    | 1 C00183[m] + 1 C00026[m] -> 1 C00141[m] + 1 C00025[m]                                                            | Branched Amino Acid  | 1 | -1000 | 1000 | 0 2.6.1.42  |
| 2.6.1.42c | branched-chain-amino-acid transaminase                    | 1 C00407[m] + 1 C00026[m] -> 1 C00671[m] + 1 C00025[m]                                                            | Branched Amino Acid  | 1 | -1000 | 1000 | 0 2.6.1.42  |
| 2.6.1.52  | phosphoserine transaminase                                | 1 C03232[c] + 1 C00025[c] -> 1 C01005[c] + 1 C00026[c]                                                            | Serine/Glycine       | 1 | -1000 | 1000 | 0 2.6.1.52  |
| 2.6.1.85  | aminodeoxychorismate synthase                             | 1 C00251[c] + 1 C00064[c] -> 1 C11355[c] + 1 C00025[c]                                                            | Folate               | 0 | 0     | 1000 | 0 2.6.1.85  |
| 2.7.1.1a  | hexokinase                                                | 1 C00002[c] + 1 C00031[c] -> 1 C00008[c] + 1 C00092[c]                                                            | Glycolysis           | 0 | 0     | 1000 | 0 2.7.1.1   |
| 2.7.1.107 | diacylglycerol kinase                                     | 1 C00002[er] + 1 C00641[er] -> 1 C00008[er] + 1 C00416[er]                                                        | Phospholipid         | 0 | 0     | 1000 | 0 2.7.1.107 |
| 2.7.1.137 | phosphatidylinositol 3-kinase                             | 1 C00002[er] + 1 C01194[er] -> 1 C00008[er] + 1 C04549[er]                                                        | Phospholipid         | 0 | 0     | 1000 | 0 2.7.1.137 |
| 2.7.1.148 | 4-(cytidine 5'-diphospho)-2-C-methyl-D-erythritol kinase  | 1 C00002[a] + 1 C11435[a] -> 1 C00008[a] + 1 C11436[a]                                                            | Terpenoid Backbone   | 0 | 0     | 1000 | 0 2.7.1.148 |
| 2.7.1.15a | ribokinase                                                | 1 C00002[c] + 1 C00121[c] -> 1 C00008[c] + 1 C00117[c]                                                            | Pentose Phosphate    | 1 | -1000 | 1000 | 0 2.7.1.15  |
| 2.7.1.15b | ribokinase                                                | 1 C00002[c] + 1 C01801[c] -> 1 C00008[c] + 1 C00673[c]                                                            | Pentose Phosphate    | 1 | -1000 | 1000 | 0 2.7.1.15  |
| 2.7.1.20  | adenosine kinase                                          | 1 C00002[c] + 1 C00212[c] -> 1 C00008[c] + 1 C00020[c]                                                            | Purine               | 1 | -1000 | 1000 | 0 2.7.1.20  |
| 2.7.1.23  | NAD+ kinase                                               | 1 C00002[c] + 1 C00003[c] -> 1 C00008[c] + 1 C00006[c]                                                            | Nicotinate           | 0 | 0     | 1000 | 0 2.7.1.23  |
| 2.7.1.24  | dephospho-CoA kinase                                      | 1 C00002[m] + 1 C00882[m] -> 1 C00008[m] + 1 C00010[m]                                                            | CoA Synthesis        | 0 | 0     | 1000 | 0 2.7.1.24  |
| 2.7.1.25  | adenylyl-sulfate kinase                                   | 1 C00002[c] + 1 C00224[c] -> 1 C00008[c] + 1 C00053[c]                                                            | Sulfur               | 0 | 0     | 1000 | 0 2.7.1.25  |
| 2.7.1.32  | choline kinase                                            | 1 C00002[c] + 1 C00114[c] -> 1 C00008[c] + 1 C00588[c]                                                            | Phospholipid         | 0 | 0     | 1000 | 0 2.7.1.32  |
| 2.7.1.33  | pantothenate kinase                                       | 1 C00002[m] + 1 C00864[m] -> 1 C00008[m] + 1 C03492[m]                                                            | CoA Synthesis        | 0 | 0     | 1000 | 0 2.7.1.33  |
| 2.7.1.39  | homoserine kinase                                         | 1 C00002[c] + 1 C00263[c] -> 1 C00008[c] + 1 C01102[c]                                                            | Serine/Glycine       | 0 | 0     | 1000 | 0 2.7.1.39  |
| 2.7.1.40a | pyruvate kinase                                           | 1 C00008[c] + 1 C00074[c] -> 1 C00002[c] + 1 C00022[c]                                                            | Glycolysis           | 0 | 0     | 1000 | 0 2.7.1.40  |
| 2.7.1.40b | pyruvate kinase                                           | 1 C00008[a] + 1 C00074[a] -> 1 C00002[a] + 1 C00022[a]                                                            | Glycolysis           | 0 | 0     | 1000 | 0 2.7.1.40  |

|           |                                                                   |                                                                      |                      |   |       |      |   |          |
|-----------|-------------------------------------------------------------------|----------------------------------------------------------------------|----------------------|---|-------|------|---|----------|
| 2.7.1.67  | 1-phosphatidylinositol 4-kinase                                   | 1 C00002[er] + 1 C01194[er] -> 1 C00008[er] + 1 C01277[er]           | Phospholipid         | 0 | 0     | 1000 | 0 | 2.7.1.67 |
| 2.7.1.68  | 1-phosphatidylinositol-4-phosphate 5-kinase                       | 1 C00002[er] + 1 C01277[er] -> 1 C00008[er] + 1 C04637[er]           | Phospholipid         | 0 | 0     | 1000 | 0 | 2.7.1.68 |
| 2.7.1.71  | shikimate kinase                                                  | 1 C00002[c] + 1 C00493[c] -> 1 C00008[c] + 1 C03175[c]               | Shikimate            | 0 | 0     | 1000 | 0 | 2.7.1.71 |
| 2.7.1.90  | diphosphate-fructose-6-phosphate 1-phosphotransferase             | 1 C00013[c] + 1 C00085[c] -> 1 C00009[c] + 1 C00354[c]               | Glycolysis           | 0 | 0     | 1000 | 0 | 2.7.1.90 |
| 2.7.2.11  | glutamate 5-kinase                                                | 1 C00002[c] + 1 C00025[c] -> 1 C00008[c] + 1 C03287[c]               | Arginine/Proline     | 0 | 0     | 1000 | 0 | 2.7.2.11 |
| 2.7.2.2   | carbamate kinase                                                  | 1 C00008[c] + 1 C00169[c] -> 1 C00002[c] + 1 C00014[c] + 1 C00011[c] | Pyrimidine           | 1 | -1000 | 1000 | 0 | 2.7.2.2  |
| 2.7.2.3a  | phosphoglycerate kinase                                           | 1 C00002[c] + 1 C00197[c] -> 1 C00008[c] + 1 C00236[c]               | Glycolysis           | 1 | -1000 | 1000 | 0 | 2.7.2.3  |
| 2.7.2.3b  | phosphoglycerate kinase                                           | 1 C00002[a] + 1 C00197[a] -> 1 C00008[a] + 1 C00236[a]               | Glycolysis           | 1 | -1000 | 1000 | 0 | 2.7.2.3  |
| 2.7.2.4   | aspartate kinase                                                  | 1 C00002[m] + 1 C00049[m] -> 1 C00008[m] + 1 C03082[m]               | Lysine               | 0 | 0     | 1000 | 0 | 2.7.2.4  |
| 2.7.4.14a | cytidylate kinase                                                 | 1 C00002[c] + 1 C00055[c] -> 1 C00008[c] + 1 C00112[c]               | Pyrimidine           | 1 | -1000 | 1000 | 0 | 2.7.4.14 |
| 2.7.4.14b | cytidylate kinase                                                 | 1 C00002[c] + 1 C00239[c] -> 1 C00008[c] + 1 C00705[c]               | Pyrimidine           | 1 | -1000 | 1000 | 0 | 2.7.4.14 |
| 2.7.4.14c | cytidylate kinase                                                 | 1 C00002[c] + 1 C00105[c] -> 1 C00008[c] + 1 C00015[c]               | Pyrimidine           | 1 | -1000 | 1000 | 0 | 2.7.4.14 |
| 2.7.4.3a  | adenylate kinase                                                  | 1 C00002[c] + 1 C00020[c] -> 2 C00008[c]                             | Purine               | 1 | -1000 | 1000 | 0 | 2.7.4.3  |
| 2.7.4.3b  | adenylate kinase                                                  | 1 C00002[c] + 1 C00360[c] -> 1 C00008[c] + 1 C00206[c]               | Purine               | 1 | -1000 | 1000 | 0 | 2.7.4.3  |
| 2.7.4.6a  | nucleoside-diphosphate kinase                                     | 1 C00002[c] + 1 C00015[c] -> 1 C00008[c] + 1 C00075[c]               | Pyrimidine           | 1 | -1000 | 1000 | 0 | 2.7.4.6  |
| 2.7.4.6b  | nucleoside-diphosphate kinase                                     | 1 C00002[c] + 1 C00035[c] -> 1 C00008[c] + 1 C00044[c]               | Purine               | 1 | -1000 | 1000 | 0 | 2.7.4.6  |
| 2.7.4.6c  | nucleoside-diphosphate kinase                                     | 1 C00002[c] + 1 C00112[c] -> 1 C00008[c] + 1 C00063[c]               | Pyrimidine           | 1 | -1000 | 1000 | 0 | 2.7.4.6  |
| 2.7.4.6d  | nucleoside-diphosphate kinase                                     | 1 C00002[c] + 1 C00104[c] -> 1 C00008[c] + 1 C00081[c]               | Purine               | 1 | -1000 | 1000 | 0 | 2.7.4.6  |
| 2.7.4.6e  | nucleoside-diphosphate kinase                                     | 1 C00002[c] + 1 C00206[c] -> 1 C00008[c] + 1 C00131[c]               | Pyrimidine           | 1 | -1000 | 1000 | 0 | 2.7.4.6  |
| 2.7.4.6f  | nucleoside-diphosphate kinase                                     | 1 C00002[c] + 1 C00361[c] -> 1 C00008[c] + 1 C00286[c]               | Purine               | 1 | -1000 | 1000 | 0 | 2.7.4.6  |
| 2.7.4.6g  | nucleoside-diphosphate kinase                                     | 1 C00002[c] + 1 C00363[c] -> 1 C00008[c] + 1 C00459[c]               | Pyrimidine           | 1 | -1000 | 1000 | 0 | 2.7.4.6  |
| 2.7.4.6h  | nucleoside-diphosphate kinase                                     | 1 C00002[c] + 1 C00705[c] -> 1 C00008[c] + 1 C00458[c]               | Pyrimidine           | 1 | -1000 | 1000 | 0 | 2.7.4.6  |
| 2.7.4.6i  | nucleoside-diphosphate kinase                                     | 1 C00002[c] + 1 C01346[c] -> 1 C00008[c] + 1 C00460[c]               | Pyrimidine           | 1 | -1000 | 1000 | 0 | 2.7.4.6  |
| 2.7.4.8a  | guanylate kinase                                                  | 1 C00002[c] + 1 C00144[c] -> 1 C00008[c] + 1 C00035[c]               | Purine               | 1 | -1000 | 1000 | 0 | 2.7.4.8  |
| 2.7.4.8b  | guanylate kinase                                                  | 1 C00002[c] + 1 C00362[c] -> 1 C00008[c] + 1 C00361[c]               | Purine               | 1 | -1000 | 1000 | 0 | 2.7.4.8  |
| 2.7.4.9a  | dTMP kinase                                                       | 1 C00002[c] + 1 C00364[c] -> 1 C00008[c] + 1 C00363[c]               | Pyrimidine           | 1 | -1000 | 1000 | 0 | 2.7.4.9  |
| 2.7.4.9b  | dTMP kinase                                                       | 1 C00002[c] + 1 C00365[c] -> 1 C00008[c] + 1 C01346[c]               | Pyrimidine           | 1 | -1000 | 1000 | 0 | 2.7.4.9  |
| 2.7.6.1   | ribose-phosphate diphosphokinase                                  | 1 C00002[c] + 1 C00117[c] -> 1 C00020[c] + 1 C00119[c]               | Pentose Phosphate    | 0 | 0     | 1000 | 0 | 2.7.6.1  |
| 2.7.6.3   | 2-amino-4-hydroxy-6-hydroxymethylhydropteridine diphosphokinase   | 1 C00002[c] + 1 C01300[c] -> 1 C00020[c] + 1 C04807[c]               | Folate               | 0 | 0     | 1000 | 0 | 2.7.6.3  |
| 2.7.7.13  | mannose-1-phosphate guanylyltransferase                           | 1 C00044[c] + 1 C00636[c] -> 1 C00013[c] + 1 C00096[c]               | Misc                 | 0 | 0     | 1000 | 0 | 2.7.7.13 |
| 2.7.7.15  | choline-phosphate cytidyltransferase                              | 1 C00063[c] + 1 C00588[c] -> 1 C00013[c] + 1 C00307[c]               | Phospholipid         | 0 | 0     | 1000 | 0 | 2.7.7.15 |
| 2.7.7.18  | Nicotinate-nucleotide adenyltransferase                           | 1 C00002[c] + 1 C01185[c] -> 1 C00013[c] + 1 C00857[c]               | Nicotinate           | 1 | -1000 | 1000 | 0 | 2.7.7.18 |
| 2.7.7.23  | UDP-N-acetylglucosamine diphosphorylase                           | 1 C00075[c] + 1 C04256[c] -> 1 C00013[c] + 1 C00043[c]               | Amino Sugar          | 0 | 0     | 1000 | 0 | 2.7.7.23 |
| 2.7.7.27  | glucose-1-phosphate adenyltransferase                             | 1 C00002[c] + 1 C00103[c] -> 1 C00013[c] + 1 C00498[c]               | Misc                 | 0 | 0     | 1000 | 0 | 2.7.7.27 |
| 2.7.7.3   | pantetheine-phosphate adenyltransferase                           | 1 C00002[m] + 1 C01134[m] -> 1 C00013[m] + 1 C00882[m]               | CoA Synthesis        | 1 | -1000 | 1000 | 0 | 2.7.7.3  |
| 2.7.7.4   | sulfate adenyltransferase                                         | 1 C00002[c] + 1 C00059[c] -> 1 C00013[c] + 1 C00224[c]               | Sulfur               | 0 | 0     | 1000 | 0 | 2.7.7.4  |
| 2.7.7.41  | phosphatidate cytidyltransferase                                  | 1 C00063[er] + 1 C00416[er] -> 1 C00013[er] + 1 C00269[er]           | Phospholipid         | 0 | 0     | 1000 | 0 | 2.7.7.41 |
| 2.7.7.60  | 2-C-methyl-D-erythritol 4-phosphate cytidyltransferase            | 1 C00063[a] + 1 C11434[a] -> 1 C00013[a] + 1 C11435[a]               | Terpenoid Backbone   | 0 | 0     | 1000 | 0 | 2.7.7.60 |
| 2.7.8.11  | CDP-diacylglycerol-inositol 3-phosphatidyltransferase             | 1 C00269[er] + 1 C00137[er] -> 1 C00055[er] + 1 C01194[er]           | Phospholipid         | 0 | 0     | 1000 | 0 | 2.7.8.11 |
| 2.7.8.15  | UDP-N-acetylglucosamine-dolichyl-phosphate                        | 1 C00043[c] + 1 C00110[c] -> 1 C00105[c] + 1 C04500[c]               | Amino Sugar          | 0 | 0     | 1000 | 0 | 2.7.8.15 |
| 2.7.8.2   | diacylglycerol cholinephosphotransferase                          | 1 C00307[er] + 1 C00641[er] -> 1 C00055[er] + 1 C00157[er]           | Phospholipid         | 0 | 0     | 1000 | 0 | 2.7.8.2  |
| 2.7.8.27  | sphingomyelin synthase                                            | 1 C00195[er] + 1 C00157[er] -> 1 C00550[er] + 1 C00641[er]           | Phospholipid         | 0 | 0     | 1000 | 0 | 2.7.8.27 |
| 2.7.8.5   | CDP-diacylglycerol-glycerol-3-phosphate 3-phosphatidyltransferase | 1 C00269[er] + 1 C00093[er] -> 1 C00055[er] + 1 C03892[er]           | Phospholipid         | 0 | 0     | 1000 | 0 | 2.7.8.5  |
| 2.7.8.8   | CDP-diacylglycerol-serine O-phosphatidyltransferase               | 1 C00269[er] + 1 C00065[er] -> 1 C00055[er] + 1 C02737[er]           | Phospholipid         | 0 | 0     | 1000 | 0 | 2.7.8.8  |
| 2.8.3.8   | acetate CoA-transferase                                           | 1 C00332[m] + 1 C00033[m] -> 1 C00164[m] + 1 C00024[m]               | Misc                 | 0 | 0     | 1000 | 0 | 2.8.3.8  |
| 3.1.1.31  | 6-phosphogluconolactonase                                         | 1 C01236[c] + 1 C00001[c] -> 1 C00345[c]                             | Pentose Phosphate    | 0 | 0     | 1000 | 0 | 3.1.1.31 |
| 3.1.1.32  | phospholipase A1                                                  | 1 C00157[er] + 1 C00001[er] -> 1 C04233[er] + 1 C00060[er]           | Phospholipid         | 0 | 0     | 1000 | 0 | 3.1.1.32 |
| 3.1.1.4   | phospholipase A2                                                  | 1 C00157[er] + 1 C00001[er] -> 1 C04230[er] + 1 C00060[er]           | Phospholipid         | 0 | 0     | 1000 | 0 | 3.1.1.4  |
| 3.1.1.5a  | lysophospholipase                                                 | 1 C04230[er] + 1 C00001[er] -> 1 C00670[er] + 1 C00060[er]           | Phospholipid         | 0 | 0     | 1000 | 0 | 3.1.1.5  |
| 3.1.1.5b  | lysophospholipase                                                 | 1 C04233[er] + 1 C00001[er] -> 1 C00670[er] + 1 C00060[er]           | Phospholipid         | 0 | 0     | 1000 | 0 | 3.1.1.5  |
| 3.1.2.14a | oleoyl-[acyl-carrier-protein] hydrolase                           | 1 C01203[a] + 1 C00001[a] -> 1 C00229[a] + 1 C00712[a]               | Fatty Acid Synthesis | 0 | 0     | 1000 | 0 | 3.1.2.14 |
| 3.1.2.14b | oleoyl-[acyl-carrier-protein] hydrolase                           | 1 C05764[a] + 1 C00001[a] -> 1 C00229[a] + 1 C00249[a]               | Fatty Acid Synthesis | 0 | 0     | 1000 | 0 | 3.1.2.14 |
| 3.1.2.14c | oleoyl-[acyl-carrier-protein] hydrolase                           | 1 C05223[a] + 1 C00001[a] -> 1 C00229[a] + 1 C02679[a]               | Fatty Acid Synthesis | 0 | 0     | 1000 | 0 | 3.1.2.14 |
| 3.1.2.14d | oleoyl-[acyl-carrier-protein] hydrolase                           | 1 C05761[a] + 1 C00001[a] -> 1 C00229[a] + 1 C06424[a]               | Fatty Acid Synthesis | 0 | 0     | 1000 | 0 | 3.1.2.14 |
| 3.1.2.14e | oleoyl-[acyl-carrier-protein] hydrolase                           | 1 C04088[a] + 1 C00001[a] -> 1 C00229[a] + 1 C01530[a]               | Fatty Acid Synthesis | 0 | 0     | 1000 | 0 | 3.1.2.14 |
| 3.1.2.2   | palmitoyl-CoA hydrolase                                           | 1 C00154[a] + 1 C00001[a] -> 1 C00010[a] + 1 C00249[a]               | Fatty Acid Synthesis | 0 | 0     | 1000 | 0 | 3.1.2.2  |
| 3.1.2.4   | 3-hydroxyisobutyryl-CoA hydrolase                                 | 1 C04047[m] + 1 C00001[m] -> 1 C00010[m] + 1 C01188[m]               | Branched Amino Acid  | 0 | 0     | 1000 | 0 | 3.1.2.4  |
| 3.1.2.6   | hydroxyacylglutathione hydrolase                                  | 1 C03451[c] + 1 C00001[c] -> 1 C00051[c] + 1 C00256[c]               | Misc                 | 0 | 0     | 1000 | 0 | 3.1.2.6  |
| 3.1.3.11  | fructose-bisphosphatase                                           | 1 C00354[c] + 1 C00001[c] -> 1 C00085[c] + 1 C00009[c]               | Glycolysis           | 0 | 0     | 1000 | 0 | 3.1.3.11 |
| 3.1.3.25  | inositol-phosphate phosphatase                                    | 1 C04006[er] + 1 C00001[er] -> 1 C00137[er] + 1 C00009[er]           | Phospholipid         | 0 | 0     | 1000 | 0 | 3.1.3.25 |
| 3.1.3.3   | phosphoserine phosphatase                                         | 1 C01005[c] + 1 C00001[c] -> 1 C00065[c] + 1 C00009[c]               | Serine/Glycine       | 0 | 0     | 1000 | 0 | 3.1.3.3  |
| 3.1.3.37  | sedoheptulose-bisphosphatase                                      | 1 C00447[c] + 1 C00001[c] -> 1 C05382[c] + 1 C00009[c]               | Glycolysis           | 0 | 0     | 1000 | 0 | 3.1.3.37 |
| 3.1.3.4   | phosphatidate phosphatase                                         | 1 C00416[er] + 1 C00001[er] -> 1 C00641[er] + 1 C00009[er]           | Phospholipid         | 0 | 0     | 1000 | 0 | 3.1.3.4  |
| 3.1.3.5a  | 5'-nucleotidase                                                   | 1 C00020[c] + 1 C00001[c] -> 1 C00212[c] + 1 C00009[c]               | Purine               | 0 | 0     | 1000 | 0 | 3.1.3.5  |
| 3.1.3.5b  | 5'-nucleotidase                                                   | 1 C00055[c] + 1 C00001[c] -> 1 C00475[c] + 1 C00009[c]               | Pyrimidine           | 0 | 0     | 1000 | 0 | 3.1.3.5  |

|           |                                                      |                                                                                        |                           |   |       |      |            |
|-----------|------------------------------------------------------|----------------------------------------------------------------------------------------|---------------------------|---|-------|------|------------|
| 3.1.3.5c  | 5'-nucleotidase                                      | 1 C00105[c] + 1 C00001[c] -> 1 C00299[c] + 1 C00009[c]                                 | Pyrimidine                | 0 | 0     | 1000 | 0 3.1.3.5  |
| 3.1.3.5d  | 5'-nucleotidase                                      | 1 C00130[c] + 1 C00001[c] -> 1 C00294[c] + 1 C00009[c]                                 | Purine                    | 0 | 0     | 1000 | 0 3.1.3.5  |
| 3.1.3.5e  | 5'-nucleotidase                                      | 1 C00144[c] + 1 C00001[c] -> 1 C00387[c] + 1 C00009[c]                                 | Purine                    | 0 | 0     | 1000 | 0 3.1.3.5  |
| 3.1.3.5f  | 5'-nucleotidase                                      | 1 C00455[c] + 1 C00001[c] -> 1 C03150[c] + 1 C00009[c]                                 | Nicotinate                | 0 | 0     | 1000 | 0 3.1.3.5  |
| 3.1.3.5g  | 5'-nucleotidase                                      | 1 C00655[c] + 1 C00001[c] -> 1 C01762[c] + 1 C00009[c]                                 | Purine                    | 0 | 0     | 1000 | 0 3.1.3.5  |
| 3.1.3.5h  | 5'-nucleotidase                                      | 1 C01185[c] + 1 C00001[c] -> 1 C05841[c] + 1 C00009[c]                                 | Nicotinate                | 0 | 0     | 1000 | 0 3.1.3.5  |
| 3.1.3.5i  | 5'-nucleotidase                                      | 1 C00362[c] + 1 C00001[c] -> 1 C00330[c] + 1 C00009[c]                                 | Purine                    | 0 | 0     | 1000 | 0 3.1.3.5  |
| 3.1.3.5j  | 5'-nucleotidase                                      | 1 C00360[c] + 1 C00001[c] -> 1 C00559[c] + 1 C00009[c]                                 | Purine                    | 1 | -1000 | 1000 | 0 3.1.3.5  |
| 3.1.3.5k  | 2'-Deoxyuridine 5'-monophosphate phosphohydrolase    | 1 C00365[c] + 1 C00001[c] -> 1 C00526[c] + 1 C00009[c]                                 | Pyrimidine                | 1 | -1000 | 1000 | 0 3.1.3.5  |
| 3.1.4.11  | phosphoinositide phospholipase C                     | 1 C04637[er] + 1 C00001[er] -> 1 C01245[er] + 1 C00641[er]                             | Phospholipid              | 0 | 0     | 1000 | 0 3.1.4.11 |
| 3.1.4.17a | 3',5'-cyclic-nucleotide phosphodiesterase            | 1 C00575[c] + 1 C00001[c] -> 1 C00020[c]                                               | Purine                    | 0 | 0     | 1000 | 0 3.1.4.17 |
| 3.1.4.17b | 3',5'-cyclic-nucleotide phosphodiesterase            | 1 C00942[c] + 1 C00001[c] -> 1 C00144[c]                                               | Purine                    | 0 | 0     | 1000 | 0 3.1.4.17 |
| 3.1.4.46  | glycerophosphodiester phosphodiesterase              | 1 C00670[c] + 1 C00001[c] -> 1 C00114[c] + 1 C00093[c]                                 | Phospholipid              | 0 | 0     | 1000 | 0 3.1.4.46 |
| 3.3.1.1   | adenosylhomocysteinase                               | 1 C00021[c] + 1 C00001[c] -> 1 C00155[c] + 1 C00212[c]                                 | Cysteine/Methionine       | 0 | 0     | 1000 | 0 3.3.1.1  |
| 3.5.1.18  | succinyl-diaminopimelate desuccinylase               | 1 C04421[m] + 1 C00001[m] -> 1 C00042[m] + 1 C00666[m]                                 | Lysine                    | 0 | 0     | 1000 | 0 3.5.1.18 |
| 3.5.1.19  | nicotinamidase                                       | 1 C00153[c] + 1 C00001[c] -> 1 C00253[c] + 1 C00014[c]                                 | Nicotinate                | 0 | 0     | 1000 | 0 3.5.1.19 |
| 3.5.1.89  | N-acetylglucosaminylphosphatidylinositol deacetylase | 1 C01288[er] + 1 C00001[er] -> 1 C04248[er] + 1 C00033[er]                             | Phospholipid              | 0 | 0     | 1000 | 0 3.5.1.89 |
| 3.5.2.3   | dihydroorotase                                       | 1 C00438[c] -> 1 C00337[c] + 1 C00001[c]                                               | Pyrimidine                | 0 | 0     | 1000 | 0 3.5.2.3  |
| 3.5.3.6   | arginine deiminase                                   | 1 C00062[c] + 1 C00001[c] -> 1 C00327[c] + 1 C00014[c]                                 | Arginine/Proline          | 0 | 0     | 1000 | 0 3.5.3.6  |
| 3.5.4.12  | dCMP aminohydrolase                                  | 1 C00239[c] + 1 C00001[c] -> 1 C00365[c] + 1 C00014[c]                                 | Pyrimidine                | 1 | -1000 | 1000 | 0 3.5.4.12 |
| 3.5.4.16  | GTP cyclohydrolase I                                 | 1 C00044[c] + 1 C00001[c] -> 1 C00058[c] + 1 C04895[c]                                 | Folate                    | 0 | 0     | 1000 | 0 3.5.4.16 |
| 3.5.4.2   | adenine deaminase                                    | 1 C00147[c] + 1 C00001[c] -> 1 C00262[c] + 1 C00014[c]                                 | Purine                    | 0 | 0     | 1000 | 0 3.5.4.2  |
| 3.5.4.4a  | adenosine deaminase                                  | 1 C00212[c] + 1 C00001[c] -> 1 C00294[c] + 1 C00014[c]                                 | Purine                    | 0 | 0     | 1000 | 0 3.5.4.4  |
| 3.5.4.4b  | adenosine deaminase                                  | 1 C00559[c] + 1 C00001[c] -> 1 C05512[c] + 1 C00014[c]                                 | Purine                    | 0 | 0     | 1000 | 0 3.5.4.4  |
| 3.5.4.6   | AMP deaminase                                        | 1 C00020[c] + 1 C00001[c] -> 1 C00130[c] + 1 C00014[c]                                 | Purine                    | 0 | 0     | 1000 | 0 3.5.4.6  |
| 3.6.1.-   | Hydrolases                                           | 1 C04895[c] + 2 C00001[c] -> 1 C04874[c] + 1 C00013[c] + 1 C00009[c]                   | Folate                    | 0 | 0     | 1000 | 0 3.6.1.-  |
| 3.6.1.1   | inorganic diphosphatase                              | 1 C00013[c] + 1 C00001[c] -> 2 C00009[c]                                               | Misc                      | 0 | 0     | 1000 | 0 3.6.1.1  |
| 3.6.1.22a | NAD+ diphosphatase                                   | 1 C00003[c] + 1 C00001[c] -> 1 C00020[c] + 1 C00455[c]                                 | Nicotinate                | 0 | 0     | 1000 | 0 3.6.1.22 |
| 3.6.1.22b | NAD+ diphosphatase                                   | 1 C00857[c] + 1 C00001[c] -> 1 C00020[c] + 1 C01185[c]                                 | Nicotinate                | 0 | 0     | 1000 | 0 3.6.1.22 |
| 3.6.1.23  | dUTP diphosphatase                                   | 1 C00460[c] + 1 C00001[c] -> 1 C00365[c] + 1 C00013[c]                                 | Pyrimidine                | 0 | 0     | 1000 | 0 3.6.1.23 |
| 3.6.1.29  | bis(5'-adenosyl)-triphosphatase                      | 1 C06197[c] + 1 C00001[c] -> 1 C00008[c] + 1 C00020[c]                                 | Purine                    | 0 | 0     | 1000 | 0 3.6.1.29 |
| 3.6.1.5a  | apyrase                                              | 1 C00002[c] + 1 C00001[c] -> 1 C00008[c] + 1 C00009[c]                                 | Purine                    | 0 | 0     | 1000 | 0 3.6.1.5  |
| 3.6.1.5b  | apyrase                                              | 1 C00008[c] + 1 C00001[c] -> 1 C00020[c] + 1 C00009[c]                                 | Purine                    | 0 | 0     | 1000 | 0 3.6.1.5  |
| 3.6.1.5c  | apyrase                                              | 1 C00015[c] + 1 C00001[c] -> 1 C00105[c] + 1 C00009[c]                                 | Pyrimidine                | 0 | 0     | 1000 | 0 3.6.1.5  |
| 3.6.1.5d  | apyrase                                              | 1 C00075[c] + 1 C00001[c] -> 1 C00015[c] + 1 C00009[c]                                 | Pyrimidine                | 0 | 0     | 1000 | 0 3.6.1.5  |
| 3.6.1.5e  | apyrase                                              | 1 C00035[c] + 1 C00001[c] -> 1 C00144[c] + 1 C00009[c]                                 | Purine                    | 0 | 0     | 1000 | 0 3.6.1.5  |
| 3.6.1.5f  | apyrase                                              | 1 C00044[c] + 1 C00001[c] -> 1 C00035[c] + 1 C00009[c]                                 | Purine                    | 0 | 0     | 1000 | 0 3.6.1.5  |
| 3.6.1.5g  | apyrase                                              | 1 C00112[c] + 1 C00001[c] -> 1 C00055[c] + 1 C00009[c]                                 | Pyrimidine                | 0 | 0     | 1000 | 0 3.6.1.5  |
| 3.6.1.5h  | apyrase                                              | 1 C00063[c] + 1 C00001[c] -> 1 C00112[c] + 1 C00009[c]                                 | Pyrimidine                | 0 | 0     | 1000 | 0 3.6.1.5  |
| 3.6.1.5i  | apyrase                                              | 1 C00081[c] + 1 C00001[c] -> 1 C00104[c] + 1 C00009[c]                                 | Purine                    | 0 | 0     | 1000 | 0 3.6.1.5  |
| 3.6.1.5j  | apyrase                                              | 1 C00104[c] + 1 C00001[c] -> 1 C00130[c] + 1 C00009[c]                                 | Purine                    | 0 | 0     | 1000 | 0 3.6.1.5  |
| 3.6.1.5k  | apyrase                                              | 1 C00363[c] + 1 C00001[c] -> 1 C00364[c] + 1 C00009[c]                                 | Pyrimidine                | 0 | 0     | 1000 | 0 3.6.1.5  |
| 3.6.1.5l  | apyrase                                              | 1 C00459[c] + 1 C00001[c] -> 1 C00363[c] + 1 C00009[c]                                 | Pyrimidine                | 0 | 0     | 1000 | 0 3.6.1.5  |
| 3.6.1.7   | acylphosphatase                                      | 1 C00227[c] + 1 C00001[c] -> 1 C00033[c] + 1 C00009[c]                                 | Misc                      | 1 | -1000 | 1000 | 0 3.6.1.7  |
| 3.6.3.12  | K+-transporting ATPase                               | 1 C00002[c] + 1 C00001[c] -> 1 C00008[c] + 1 C00009[c] + 1 C00238[c]                   | Extracellular Transport   | 0 | 0     | 1000 | 0 3.6.3.12 |
| 3.6.3.14  | H+-transporting two-sector ATPase                    | 1 C00002[m] + 1 C00001[m] + 3.5 C00080[m] -> 1 C00008[m] + 1 C00009[m] + 3.5 C00080[m] | Oxidative Phosphorylation | 1 | -1000 | 1000 | 0 3.6.3.14 |
| 3.6.3.16  | arsenite-transporting ATPase                         | 1 C00002[c] + 1 C00001[c] + 1 C06697[c] -> 1 C00008[c] + 1 C00009[c]                   | Extracellular Transport   | 0 | 0     | 1000 | 0 3.6.3.16 |
| 3.6.3.25  | sulfate-transporting ATPase                          | 1 C00002[c] + 1 C00001[c] -> 1 C00008[c] + 1 C00009[c] + 1 C00059[c]                   | Extracellular Transport   | 0 | 0     | 1000 | 0 3.6.3.25 |
| 3.6.3.4   | Cu2+-exporting ATPase                                | 1 C00002[c] + 1 C00001[c] + 1 C00070[c] -> 1 C00008[c] + 1 C00009[c]                   | Extracellular Transport   | 0 | 0     | 1000 | 0 3.6.3.4  |
| 3.6.3.44  | xenobiotic-transporting ATPase                       | 1 C00002[c] + 1 C00001[c] + 1 xenobiotic[c] -> 1 C00008[c] + 1 C00009[c]               | Extracellular Transport   | 0 | 0     | 1000 | 0 3.6.3.44 |
| 3.6.3.6   | H+-exporting ATPase                                  | 1 C00002[c] + 1 C00001[c] + 1 C00080[c] -> 1 C00008[c] + 1 C00009[c]                   | Extracellular Transport   | 0 | 0     | 1000 | 0 3.6.3.6  |
| 3.6.3.8   | Ca2+-transporting ATPase                             | 1 C00002[c] + 1 C00001[c] -> 1 C00008[c] + 1 C00009[c] + 1 C00076[c]                   | Extracellular Transport   | 0 | 0     | 1000 | 0 3.6.3.8  |
| 4.1.1.20  | diaminopimelate decarboxylase                        | 1 C00680[m] -> 1 C00047[m] + 1 C00011[m]                                               | Lysine                    | 0 | 0     | 1000 | 0 4.1.1.20 |
| 4.1.1.23  | orotidine-5'-phosphate decarboxylase                 | 1 C01103[c] -> 1 C00105[c] + 1 C00011[c]                                               | Pyrimidine                | 0 | 0     | 1000 | 0 4.1.1.23 |
| 4.1.1.36  | phosphopantotheno[cysteine] decarboxylase            | 1 C04352[m] -> 1 C01134[m] + 1 C00011[m]                                               | CoA Synthesis             | 0 | 0     | 1000 | 0 4.1.1.36 |
| 4.1.1.37  | uroporphyrinogen decarboxylase                       | 1 C01051[a] -> 1 C03263[a] + 4 C00011[a]                                               | Porphyrin                 | 0 | 0     | 1000 | 0 4.1.1.37 |
| 4.1.1.49  | phosphoenolpyruvate carboxykinase (ATP)              | 1 C00002[c] + 1 C00036[c] -> 1 C00008[c] + 1 C00074[c] + 1 C00011[c]                   | Glycolysis                | 0 | 0     | 1000 | 0 4.1.1.49 |
| 4.1.1.65  | phosphatidylserine decarboxylase                     | 1 C02737[er] -> 1 C00350[er] + 1 C00011[er]                                            | Phospholipid              | 0 | 0     | 1000 | 0 4.1.1.65 |
| 4.1.2.13a | fructose-bisphosphate aldolase                       | 1 C00354[c] -> 1 C00111[c] + 1 C00118[c]                                               | Glycolysis                | 1 | -1000 | 1000 | 0 4.1.2.13 |
| 4.1.2.13b | fructose-bisphosphate aldolase                       | 1 C00447[c] -> 1 C00111[c] + 1 C00279[c]                                               | Pentose Phosphate         | 1 | -1000 | 1000 | 0 4.1.2.13 |
| 4.1.2.25  | dihydroneopterin aldolase                            | 1 C04874[c] -> 1 C01300[c] + 1 C00266[c]                                               | Folate                    | 0 | 0     | 1000 | 0 4.1.2.25 |
| 4.1.2.4   | deoxyribose-phosphate aldolase                       | 1 C00673[c] -> 1 C00118[c] + 1 C00084[c]                                               | Pentose Phosphate         | 1 | -1000 | 1000 | 0 4.1.2.4  |
| 4.1.3.30  | methylisocitrate lyase                               | 1 C04593[m] -> 1 C00042[m] + 1 C00022[m]                                               | MC Cycle                  | 0 | 0     | 1000 | 0 4.1.3.30 |
| 4.1.3.38  | aminodeoxychorismate lyase                           | 1 C11355[c] -> 1 C00568[c] + 1 C00022[c]                                               | Folate                    | 0 | 0     | 1000 | 0 4.1.3.38 |
| 4.2.1.10  | 3-dehydroquinate dehydratase                         | 1 C00944[c] -> 1 C02637[c] + 1 C00001[c]                                               | Shikimate                 | 1 | -1000 | 1000 | 0 4.2.1.10 |

|           |                                                       |                                                                                                                    |                      |   |       |      |   |          |
|-----------|-------------------------------------------------------|--------------------------------------------------------------------------------------------------------------------|----------------------|---|-------|------|---|----------|
| 4.2.1.11  | phosphopyruvate hydratase                             | 1 C00631[c] -> 1 C00074[c] + 1 C00001[c]                                                                           | Glycolysis           | 1 | -1000 | 1000 | 0 | 4.2.1.11 |
| 4.2.1.17a | enoyl-CoA hydratase                                   | 1 C00640[m] -> 1 C00658[m] + 1 C00001[m]                                                                           | Beta Oxidation       | 1 | -1000 | 1000 | 0 | 4.2.1.17 |
| 4.2.1.17b | enoyl-CoA hydratase                                   | 1 C04405[m] -> 1 C03345[m] + 1 C00001[m]                                                                           | Branched Amino Acid  | 1 | -1000 | 1000 | 0 | 4.2.1.17 |
| 4.2.1.17c | enoyl-CoA hydratase                                   | 1 C04047[m] -> 1 C03460[m] + 1 C00001[m]                                                                           | Branched Amino Acid  | 1 | -1000 | 1000 | 0 | 4.2.1.17 |
| 4.2.1.18  | methylglutaconyl-CoA hydratase                        | 1 C03231[m] + 1 C00001[m] -> 1 C00356[m]                                                                           | Branched Amino Acid  | 1 | -1000 | 1000 | 0 | 4.2.1.18 |
| 4.2.1.2   | fumarate hydratase                                    | 1 C00122[m] + 1 C00001[m] -> 1 C00149[m]                                                                           | TCA Cycle            | 1 | -1000 | 1000 | 0 | 4.2.1.2  |
| 4.2.1.22  | cystathionine beta-synthase                           | 1 C00065[c] + 1 C00155[c] -> 1 C02291[c] + 1 C00001[c]                                                             | Cysteine/Methionine  | 0 | 0     | 1000 | 0 | 4.2.1.22 |
| 4.2.1.24  | porphobilinogen synthase                              | 2 C00430[a] -> 1 C00931[a] + 2 C00001[a]                                                                           | Porphyrin            | 0 | 0     | 1000 | 0 | 4.2.1.24 |
| 4.2.1.3   | aconitate hydratase                                   | 1 C00158[m] -> 1 C00311[m]                                                                                         | TCA Cycle            | 1 | -1000 | 1000 | 0 | 4.2.1.3  |
| 4.2.1.52  | dihydrodipicolinate synthase                          | 1 C00441[m] + 1 C00022[m] -> 1 C03340[m] + 2 C00001[m]                                                             | Lysine               | 0 | 0     | 1000 | 0 | 4.2.1.52 |
| 4.2.1.60a | 3-hydroxydecanoyl-[acp] dehydratase                   | 1 C04619[a] -> 1 C05754[a] + 1 C00001[a]                                                                           | Fatty Acid Synthesis | 1 | -1000 | 1000 | 0 | 4.2.1.60 |
| 4.2.1.60b | 3-hydroxydecanoyl-[acp] dehydratase                   | 1 C05757[a] -> 1 C05758[a] + 1 C00001[a]                                                                           | Fatty Acid Synthesis | 1 | -1000 | 1000 | 0 | 4.2.1.60 |
| 4.2.1.60c | 3-hydroxydecanoyl-[acp] dehydratase                   | 1 C04618[a] -> 1 C04246[a] + 1 C00001[a]                                                                           | Fatty Acid Synthesis | 1 | -1000 | 1000 | 0 | 4.2.1.60 |
| 4.2.1.60d | 3-hydroxydecanoyl-[acp] dehydratase                   | 1 C05747[a] -> 1 C05748[a] + 1 C00001[a]                                                                           | Fatty Acid Synthesis | 1 | -1000 | 1000 | 0 | 4.2.1.60 |
| 4.2.1.60e | 3-hydroxydecanoyl-[acp] dehydratase                   | 1 C04620[a] -> 1 C05751[a] + 1 C00001[a]                                                                           | Fatty Acid Synthesis | 1 | -1000 | 1000 | 0 | 4.2.1.60 |
| 4.2.1.61a | 3-hydroxydecanoyl-[acp] dehydratase                   | 1 C04688[a] -> 1 C05760[a] + 1 C00001[a]                                                                           | Fatty Acid Synthesis | 1 | -1000 | 1000 | 0 | 4.2.1.61 |
| 4.2.1.61b | 3-hydroxydecanoyl-[acp] dehydratase                   | 1 C04633[a] -> 1 C05763[a] + 1 C00001[a]                                                                           | Fatty Acid Synthesis | 1 | -1000 | 1000 | 0 | 4.2.1.61 |
| 4.2.1.61c | 3-hydroxydecanoyl-[acp] dehydratase                   | 1 C16220[a] -> 1 C16221[a] + 1 C00001[a]                                                                           | Fatty Acid Synthesis | 1 | -1000 | 1000 | 0 | 4.2.1.61 |
| 4.2.1.75  | uroporphyrinogen-III synthase                         | 1 C01024[a] -> 1 C01051[a] + 1 C00001[a]                                                                           | Porphyrin            | 1 | -1000 | 1000 | 0 | 4.2.1.75 |
| 4.2.1.79  | 2-methylcitrate dehydratase                           | 1 C02225[m] -> 1 C04225[m] + 1 C00001[m]                                                                           | MC Cycle             | 1 | -1000 | 1000 | 0 | 4.2.1.79 |
| 4.2.1.96  | 4a-hydroxytetrahydrobiopterin dehydratase             | 1 C15522[c] -> 1 C00268[c] + 1 C00001[c]                                                                           | Biopterin            | 1 | -1000 | 1000 | 0 | 4.2.1.96 |
| 4.2.1.99  | 2-methylisocitrate dehydratase                        | 1 C04593[m] -> 1 C04225[m] + 1 C00001[m]                                                                           | MC Cycle             | 1 | -1000 | 1000 | 0 | 4.2.1.99 |
| 4.2.3.1   | threonine synthase                                    | 1 C01102[c] + 1 C00001[c] -> 1 C00188[c] + 1 C00009[c]                                                             | Serine/Glycine       | 0 | 0     | 1000 | 0 | 4.2.3.1  |
| 4.2.3.12  | 6-pyruvoyltetrahydropterin synthase                   | 1 C04895[c] + 1 C00008[c] -> 1 C03684[c] + 1 C00002[c] + 1 C00013[c]                                               | Biopterin            | 0 | 0     | 1000 | 0 | 4.2.3.12 |
| 4.2.3.4   | 3-dehydroquininate synthase                           | 1 C04691[c] -> 1 C00944[c] + 1 C00009[c]                                                                           | Shikimate            | 0 | 0     | 1000 | 0 | 4.2.3.4  |
| 4.2.3.5   | chorismate synthase                                   | 1 C01269[c] -> 1 C00251[c] + 1 C00009[c]                                                                           | Shikimate            | 0 | 0     | 1000 | 0 | 4.2.3.5  |
| 4.3.2.2   | adenylosuccinate lyase                                | 1 C03794[m] -> 1 C00122[m] + 1 C00020[m]                                                                           | Purine               | 1 | -1000 | 1000 | 0 | 4.3.2.2  |
| 4.4.1.1   | cystathionine gamma-lyase                             | 1 C02291[c] + 1 C00001[c] -> 1 C00097[c] + 1 C00014[c] + 1 C00109[c]                                               | Cysteine/Methionine  | 0 | 0     | 1000 | 0 | 4.4.1.1  |
| 4.4.1.17  | holocytochrome-c synthase                             | 1 C00032[c] -> 1 C00126[c]                                                                                         | Porphyrin            | 0 | 0     | 1000 | 0 | 4.4.1.17 |
| 4.4.1.5   | lactoylglutathione lyase                              | 1 C03451[c] -> 1 C00051[c] + 1 C00546[c]                                                                           | Misc                 | 1 | -1000 | 1000 | 0 | 4.4.1.5  |
| 4.6.1.1a  | adenylate cyclase                                     | 1 C00002[c] -> 1 C00575[c] + 1 C00013[c]                                                                           | Purine               | 0 | 0     | 1000 | 0 | 4.6.1.1  |
| 4.6.1.1b  | adenylate cyclase                                     | 1 C00044[c] -> 1 C00942[c] + 1 C00013[c]                                                                           | Purine               | 0 | 0     | 1000 | 0 | 4.6.1.1  |
| 4.6.1.12  | 2-C-methyl-D-erythritol 2,4-cyclodiphosphate synthase | 1 C11436[a] -> 1 C11453[a] + 1 C00055[a]                                                                           | Terpenoid Backbone   | 0 | 0     | 1000 | 0 | 4.6.1.12 |
| 4.99.1.1  | ferrochelatase                                        | 1 C02191[m] + 1 C14818[m] -> 1 C00032[m] + 2 C00080[m]                                                             | Porphyrin            | 0 | 0     | 1000 | 0 | 4.99.1.1 |
| 5.1.1.7   | diaminopimelate epimerase                             | 1 C00666[m] -> 1 C00680[m]                                                                                         | Lysine               | 1 | -1000 | 1000 | 0 | 5.1.1.7  |
| 5.1.3.1   | ribulose-phosphate 3-epimerase                        | 1 C00199[c] -> 1 C00231[c]                                                                                         | Pentose Phosphate    | 1 | -1000 | 1000 | 0 | 5.1.3.1  |
| 5.1.3.2   | UDP-glucose 4-epimerase                               | 1 C00029[c] -> 1 C00052[c]                                                                                         | Misc                 | 1 | -1000 | 1000 | 0 | 5.1.3.2  |
| 5.3.1.1a  | triose-phosphate isomerase                            | 1 C00118[c] -> 1 C00111[c]                                                                                         | Glycolysis           | 1 | -1000 | 1000 | 0 | 5.3.1.1  |
| 5.3.1.1b  | triose-phosphate isomerase                            | 1 C00118[a] -> 1 C00111[a]                                                                                         | Glycolysis           | 1 | -1000 | 1000 | 0 | 5.3.1.1  |
| 5.3.1.6   | ribose-5-phosphate isomerase                          | 1 C00199[c] -> 1 C00117[c]                                                                                         | Pentose Phosphate    | 1 | -1000 | 1000 | 0 | 5.3.1.6  |
| 5.3.1.8   | mannose-6-phosphate isomerase                         | 1 C00275[c] -> 1 C00085[c]                                                                                         | Misc                 | 1 | -1000 | 1000 | 0 | 5.3.1.8  |
| 5.3.1.9   | glucose-6-phosphate isomerase                         | 1 C00092[c] -> 1 C00085[c]                                                                                         | Glycolysis           | 1 | -1000 | 1000 | 0 | 5.3.1.9  |
| 5.4.2.1   | phosphoglycerate mutase                               | 1 C00197[c] -> 1 C00631[c]                                                                                         | Glycolysis           | 1 | -1000 | 1000 | 0 | 5.4.2.1  |
| 5.4.2.2   | phosphoglucomutase                                    | 1 C00103[c] -> 1 C00092[c]                                                                                         | Glycolysis           | 1 | -1000 | 1000 | 0 | 5.4.2.2  |
| 5.4.2.3   | phosphoacetylglucosamine mutase                       | 1 C04256[c] -> 1 C00357[c]                                                                                         | Amino Sugar          | 1 | -1000 | 1000 | 0 | 5.4.2.3  |
| 5.4.2.8   | phosphomannomutase                                    | 1 C00636[c] -> 1 C00275[c]                                                                                         | Misc                 | 1 | -1000 | 1000 | 0 | 5.4.2.8  |
| 5.5.1.4   | inositol-3-phosphate synthase                         | 1 C00092[c] -> 1 C04006[c]                                                                                         | Phospholipid         | 1 | -1000 | 1000 | 0 | 5.5.1.4  |
| 6.2.1.1   | acetate-CoA ligase                                    | 1 C00002[c] + 1 C00033[c] + 1 C00010[c] -> 1 C00020[c] + 1 C00013[c] + 1 C00024[c]                                 | Glycolysis           | 0 | 0     | 1000 | 0 | 6.2.1.1  |
| 6.2.1.3a  | long-chain-fatty-acid-CoA ligase                      | 1 C00002[a] + 1 C00060[a] + 1 C00010[a] -> 1 C00020[a] + 1 C00013[a] + 1 C00040[a]                                 | Fatty Acid Synthesis | 1 | -1000 | 1000 | 0 | 6.2.1.3  |
| 6.2.1.3b  | long-chain-fatty-acid-CoA ligase                      | 1 C00020[a] + 1 C00154[a] + 1 C00013[a] -> 1 C00002[a] + 1 C00249[a] + 1 C00010[a]                                 | Fatty Acid Synthesis | 1 | -1000 | 1000 | 0 | 6.2.1.3  |
| 6.2.1.3c  | long-chain-fatty-acid-CoA ligase                      | 1 C00002[a] + 1 C00712[a] + 1 C00010[a] -> 1 C00020[a] + 1 C00510[a] + 1 C00013[a]                                 | Fatty Acid Synthesis | 1 | -1000 | 1000 | 0 | 6.2.1.3  |
| 6.2.1.3d  | long-chain-fatty-acid-CoA ligase                      | 1 C00020[a] + 1 C02050[a] + 1 C00013[a] -> 1 C00002[a] + 1 C01595[a] + 1 C00010[a]                                 | Fatty Acid Synthesis | 1 | -1000 | 1000 | 0 | 6.2.1.3  |
| 6.2.1.5   | succinate-CoA ligase (ADP-forming)                    | 1 C00008[m] + 1 C00009[m] + 1 C00091[m] -> 1 C00002[m] + 1 C00042[m] + 1 C00010[m]                                 | TCA Cycle            | 1 | -1000 | 1000 | 0 | 6.2.1.5  |
| 6.3.1.2   | glutamate-ammonia ligase                              | 1 C00002[c] + 1 C00025[c] + 1 C00014[c] -> 1 C00008[c] + 1 C00009[c] + 1 C00064[c]                                 | Glutamate/Glutamine  | 0 | 0     | 1000 | 0 | 6.3.1.2  |
| 6.3.2.1   | pantoate-beta-alanine ligase                          | 1 C00002[c] + 1 C00522[c] + 1 C00099[c] -> 1 C00020[c] + 1 C00013[c] + 1 C00864[c]                                 | CoA Synthesis        | 0 | 0     | 1000 | 0 | 6.3.2.1  |
| 6.3.2.17  | tetrahydrofolate synthase                             | 1 C00002[c] + 1 C00921[c] + 1 C00025[c] -> 1 C00008[c] + 1 C00009[c] + 1 C00415[c]                                 | Folate               | 0 | 0     | 1000 | 0 | 6.3.2.17 |
| 6.3.2.2   | glutamate-cysteine ligase                             | 1 C00002[c] + 1 C00025[c] + 1 C00097[c] -> 1 C00008[c] + 1 C00009[c] + 1 C00669[c]                                 | Glutamate/Glutamine  | 0 | 0     | 1000 | 0 | 6.3.2.2  |
| 6.3.2.3   | glutathione synthase                                  | 1 C00002[c] + 1 C00669[c] + 1 C00037[c] -> 1 C00008[c] + 1 C00009[c] + 1 C00051[c]                                 | Glutamate/Glutamine  | 0 | 0     | 1000 | 0 | 6.3.2.3  |
| 6.3.2.5   | phosphopantothenate-cysteine ligase                   | 1 C00063[m] + 1 C03492[m] + 1 C00097[m] -> 1 C00055[m] + 1 C00013[m] + 1 C04352[m]                                 | CoA Synthesis        | 0 | 0     | 1000 | 0 | 6.3.2.5  |
| 6.3.4.2   | CTP synthase                                          | 1 C00002[c] + 1 C00075[c] + 1 C00014[c] -> 1 C00008[c] + 1 C00009[c] + 1 C00063[c]                                 | Pyrimidine           | 0 | 0     | 1000 | 0 | 6.3.4.2  |
| 6.3.4.4   | adenylosuccinate synthase                             | 1 C00044[c] + 1 C00130[c] + 1 C00049[c] -> 1 C00035[c] + 1 C00009[c] + 1 C03794[c]                                 | Purine               | 0 | 0     | 1000 | 0 | 6.3.4.4  |
| 6.3.5.1   | NAD+ synthase (glutamine-hydrolysing)                 | 1 C00002[c] + 1 C00857[c] + 1 C00064[c] + 1 C00001[c] -> 1 C00020[c] + 1 C00013[c] + 1 C00003[c] + 1 C00025[c]     | Nicotinate           | 1 | -1000 | 1000 | 0 | 6.3.5.1  |
| 6.3.5.2   | GMP synthase (glutamine-hydrolysing)                  | 1 C00002[c] + 1 C00655[c] + 1 C00064[c] + 1 C00001[c] -> 1 C00020[c] + 1 C00013[c] + 1 C00144[c] + 1 C00025[c]     | Purine               | 0 | 0     | 1000 | 0 | 6.3.5.2  |
| 6.3.5.4   | asparagine synthase (glutamine-hydrolysing)           | 1 C00002[c] + 1 C00049[c] + 1 C00064[c] + 1 C00001[c] -> 1 C00020[c] + 1 C00013[c] + 1 C00152[c] + 1 C00025[c]     | Glutamate/Glutamine  | 1 | -1000 | 1000 | 0 | 6.3.5.4  |
| 6.3.5.5   | carbamoyl-phosphate synthase (glutamine-hydrolysing)  | 2 C00002[c] + 1 C00064[c] + 1 C00288[c] + 1 C00001[c] + 1 C00080[c] -> 2 C00008[c] + 1 C00009[c] + 1 C00025[c] + 1 | Pyrimidine           | 0 | 0     | 1000 | 0 | 6.3.5.5  |

|           |                                   |                                                                                                                          |                      |   |       |      |   |         |
|-----------|-----------------------------------|--------------------------------------------------------------------------------------------------------------------------|----------------------|---|-------|------|---|---------|
| 6.4.1.1   | pyruvate carboxylase              | 1 C00002[m] + 1 C00022[m] + 1 C00288[m] + 1 C00080[m] -> 1 C00008[m] + 1 C00009[m] + 1 C00036[m]                         | TCA Cycle            | 0 | 0     | 1000 | 0 | 6.4.1.1 |
| 6.4.1.2a  | acetyl-CoA carboxylase            | 1 C00002[c] + 1 C00024[c] + 1 C00288[c] + 1 C00080[c] -> 1 C00008[c] + 1 C00009[c] + 1 C00083[c]                         | Fatty Acid Synthesis | 1 | -1000 | 1000 | 0 | 6.4.1.2 |
| 6.4.1.2b  | acetyl-CoA carboxylase            | 1 C00002[a] + 1 C00024[a] + 1 C00288[a] + 1 C00080[a] -> 1 C00008[a] + 1 C00009[a] + 1 C00083[a]                         | Fatty Acid Synthesis | 1 | -1000 | 1000 | 0 | 6.4.1.2 |
| 6.4.1.4   | methylcrotonoyl-CoA carboxylase   | 1 C00002[m] + 1 C03069[m] + 1 C00288[m] + 1 C00080[m] -> 1 C00008[m] + 1 C00009[m] + 1 C03231[m]                         | Branched Amino Acid  | 0 | 0     | 1000 | 0 | 6.4.1.4 |
| NGAM      | Non-growth associated maintenance | 1 C00002[c] + 1 C00001[c] -> 1 C00008[c] + 1 C00009[c] + 1 C00080[c]                                                     | Biomass              | 0 | 5     | 1000 | 0 |         |
| GAM       | Growth associated maintenance     | 28.76 C00002[c] + 28.76 C00001[c] -> 28.76 C00008[c] + 28.76 C00009[c] + 28.76 C00080[c] + 1 GAM[u]                      | Biomass              | 0 | 0     | 1000 | 0 |         |
| DNA       | DNA composition                   | 0.002855 C00131[c] + 0.003128 C00458[c] + 0.003128 C00286[c] + 0.002855 C00459[c] -> 1 DNA[u] + 0.011966 C00001[c]       | Biomass              | 0 | 0     | 1000 | 0 |         |
| RNA       | RNA composition                   | 0.01678 C00002[c] + 0.02167 C00063[c] + 0.02263 C00044[c] + 0.01523 C00075[c] -> 1 RNA[u] + 0.07631 C00013[c]            | Biomass              | 0 | 0     | 1000 | 0 |         |
| Proteins  | Amino acid composition            | 0.684 C00041[c] + 0.1297 C00097[c] + 0.3194 C00049[c] + 0.5263 C00025[c] + 0.2276 C00079[c] + 0.5002 C00037[c]           | Biomass              | 0 | 0     | 1000 | 0 |         |
| Lipids    | Lipid composition                 | 0.007777 C01194[er] + 0.08017 C00157[er] + 0.01084 C02737[er] + 0.01141 C00550[er] + 0.0153 C00350[er] + 0.035 Biomass   | Biomass              | 0 | 0     | 1000 | 0 |         |
| EMs       | Essential Molecules               | 0.00563 C00010[m] + 0.00563 C00101[c] + 0.00563 C00032[c] + 0.00563 C04574[m] + 0.00563 C00018[c] + 0.00563 C00001[a]    | Biomass              | 0 | 0     | 1000 | 0 |         |
| Biomass   | Biomass                           | 1 DNA[u] + 1 RNA[u] + 1 Proteins[u] + 1 Lipids[u] + 1 EMs[u] + 1 GAM[u] ->                                               | Biomass              | 0 | 0     | 1000 | 1 |         |
| Acyl      | fatty acid aggregate              | 0.073 C02679[a] + 0.09 C06424[a] + 0.166 C00249[a] + 0.108 C01530[a] + 0.306 C00712[a] + 0.198 C01595[a] + 0.058 Biomass | Biomass              | 0 | 0     | 1000 | 0 |         |
| Blackbox1 | arachidonic acid blackbox         | 1 C03035[a] + 1 C00024[a] + 1 C00030[a] + 1 C00007[a] -> 1 C00219[a] + 1 C00028[a] + 2 C00010[a] + 2 C00001[a]           | Fatty Acid Synthesis | 0 | 0     | 1000 | 0 |         |
| Currency1 | Acceptor exchange [a]             | 1 C00028[a] + 1 C00004[a] -> 1 C00080[a] + 1 C00030[a] + 1 C00003[a]                                                     | Currency Exchange    | 1 | -1000 | 1000 | 0 |         |
| Currency2 | Acceptor exchange [er]            | 1 C00028[er] + 1 C00004[c] + 1 C00080[c] -> 1 C00030[er] + 1 C00003[c]                                                   | Currency Exchange    | 1 | -1000 | 1000 | 0 |         |
| Currency3 | Ferredoxin exchange               | 1 C00139[a] + 1 C00004[a] + 1 C00080[a] -> 1 C00138[a] + 1 C00003[a]                                                     | Currency Exchange    | 1 | -1000 | 1000 | 0 |         |
| S1        | bicarbonate[c]                    | 1 C00011[c] + 1 C00001[c] -> 1 C00288[c] + 1 C00080[c]                                                                   | Spontaneous          | 1 | -1000 | 1000 | 0 |         |
| S2        | bicarbonate[a]                    | 1 C00011[a] + 1 C00001[a] -> 1 C00288[a] + 1 C00080[a]                                                                   | Spontaneous          | 1 | -1000 | 1000 | 0 |         |
| S3        | bicarbonate[m]                    | 1 C00011[m] + 1 C00001[m] -> 1 C00288[m] + 1 C00080[m]                                                                   | Spontaneous          | 1 | -1000 | 1000 | 0 |         |
| O1        | ATP[a]                            | 1 C00002[c] -> 1 C00002[a]                                                                                               | Organellar Transport | 1 | -1000 | 1000 | 0 |         |
| O2        | ADP[a]                            | 1 C00008[a] -> 1 C00008[c]                                                                                               | Organellar Transport | 1 | -1000 | 1000 | 0 |         |
| O3        | AMP[a]                            | 1 C00020[a] -> 1 C00020[c]                                                                                               | Organellar Transport | 1 | -1000 | 1000 | 0 |         |
| O4        | CTP[a]                            | 1 C00063[c] + 1 C00055[a] + 1 C00013[a] -> 1 C00055[c] + 1 C00063[a] + 1 C00013[c]                                       | Organellar Transport | 1 | -1000 | 1000 | 0 |         |
| O5        | phosphate[a]                      | 1 C00009[a] -> 1 C00009[c]                                                                                               | Organellar Transport | 1 | -1000 | 1000 | 0 |         |
| O6        | diphosphate[a]                    | 1 C00013[a] -> 1 C00013[c]                                                                                               | Organellar Transport | 1 | -1000 | 1000 | 0 |         |
| O7        | NADH[a]                           | 1 C00004[c] -> 1 C00004[a]                                                                                               | Organellar Transport | 1 | -1000 | 1000 | 0 |         |
| O8        | NAD+[a]                           | 1 C00003[a] -> 1 C00003[c]                                                                                               | Organellar Transport | 1 | -1000 | 1000 | 0 |         |
| O9        | NADPH[a]                          | 1 C00005[c] -> 1 C00005[a]                                                                                               | Organellar Transport | 1 | -1000 | 1000 | 0 |         |
| O10       | NADP+[a]                          | 1 C00006[a] -> 1 C00006[c]                                                                                               | Organellar Transport | 1 | -1000 | 1000 | 0 |         |
| O11       | H+[a]                             | 1 C00080[c] -> 1 C00080[a]                                                                                               | Organellar Transport | 1 | -1000 | 1000 | 0 |         |
| O12       | Fe2+[m]                           | 1 C14818[c] -> 1 C14818[m]                                                                                               | Organellar Transport | 1 | -1000 | 1000 | 0 |         |
| O13       | O2[a]                             | 1 C00007[c] -> 1 C00007[a]                                                                                               | Organellar Transport | 1 | -1000 | 1000 | 0 |         |
| O14       | H2O[a]                            | 1 C00001[a] -> 1 C00001[c]                                                                                               | Organellar Transport | 1 | -1000 | 1000 | 0 |         |
| O15       | CO2[a]                            | 1 C00011[a] -> 1 C00011[c]                                                                                               | Organellar Transport | 1 | -1000 | 1000 | 0 |         |
| O16       | H2O2[a]                           | 1 C00027[a] -> 1 C00027[c]                                                                                               | Organellar Transport | 1 | -1000 | 1000 | 0 |         |
| O17       | NH3[a]                            | 1 C00014[a] -> 1 C00014[c]                                                                                               | Organellar Transport | 1 | -1000 | 1000 | 0 |         |
| O18       | CoA[a]                            | 1 C00010[a] -> 1 C00010[c]                                                                                               | Organellar Transport | 1 | -1000 | 1000 | 0 |         |
| O19       | palmitoyl-CoA[a]                  | 1 C00154[a] -> 1 C00154[c]                                                                                               | Organellar Transport | 1 | -1000 | 1000 | 0 |         |
| O20       | glycerone-phosphate[a]            | 1 C00111[c] -> 1 C00111[a]                                                                                               | Organellar Transport | 1 | -1000 | 1000 | 0 |         |
| O21       | phosphoenolpyruvate[a]            | 1 C00074[c] + 1 C00009[a] -> 1 C00074[a] + 1 C00009[c]                                                                   | Organellar Transport | 1 | -1000 | 1000 | 0 |         |
| O22       | 3-phospho-D-glycerate[a]          | 1 C00197[a] -> 1 C00197[c]                                                                                               | Organellar Transport | 1 | -1000 | 1000 | 0 |         |
| O23       | ATP[er]                           | 1 C00002[c] -> 1 C00002[er]                                                                                              | Organellar Transport | 1 | -1000 | 1000 | 0 |         |
| O24       | ADP[er]                           | 1 C00008[er] -> 1 C00008[c]                                                                                              | Organellar Transport | 1 | -1000 | 1000 | 0 |         |
| O25       | CTP[er]                           | 1 C00063[c] + 1 C00055[er] + 1 C00013[er] -> 1 C00055[c] + 1 C00063[er] + 1 C00013[c]                                    | Organellar Transport | 1 | -1000 | 1000 | 0 |         |
| O26       | CMP[er]                           | 1 C00055[er] -> 1 C00055[c]                                                                                              | Organellar Transport | 1 | -1000 | 1000 | 0 |         |
| O27       | phosphate[er]                     | 1 C00009[er] -> 1 C00009[c]                                                                                              | Organellar Transport | 1 | -1000 | 1000 | 0 |         |
| O28       | NAD+[er]                          | 1 C00003[er] -> 1 C00003[c]                                                                                              | Organellar Transport | 1 | -1000 | 1000 | 0 |         |
| O29       | NADH[er]                          | 1 C00004[c] -> 1 C00004[er]                                                                                              | Organellar Transport | 1 | -1000 | 1000 | 0 |         |
| O30       | NADP+[er]                         | 1 C00006[er] -> 1 C00006[c]                                                                                              | Organellar Transport | 1 | -1000 | 1000 | 0 |         |
| O31       | NADPH[er]                         | 1 C00005[c] -> 1 C00005[er]                                                                                              | Organellar Transport | 1 | -1000 | 1000 | 0 |         |
| O32       | H+[er]                            | 1 C00080[c] -> 1 C00080[er]                                                                                              | Organellar Transport | 1 | -1000 | 1000 | 0 |         |
| O33       | O2[er]                            | 1 C00007[c] -> 1 C00007[er]                                                                                              | Organellar Transport | 1 | -1000 | 1000 | 0 |         |
| O34       | H2O[er]                           | 1 C00001[c] -> 1 C00001[er]                                                                                              | Organellar Transport | 1 | -1000 | 1000 | 0 |         |
| O35       | CO2[er]                           | 1 C00011[er] -> 1 C00011[c]                                                                                              | Organellar Transport | 1 | -1000 | 1000 | 0 |         |
| O36       | L-serine[er]                      | 1 C00065[c] -> 1 C00065[er]                                                                                              | Organellar Transport | 1 | -1000 | 1000 | 0 |         |
| O37       | CoA[er]                           | 1 C00010[er] -> 1 C00010[c]                                                                                              | Organellar Transport | 1 | -1000 | 1000 | 0 |         |
| O38       | acyl[er]                          | 1 C00060[er] -> 1 C00060[a]                                                                                              | Organellar Transport | 1 | -1000 | 1000 | 0 |         |
| O39       | acyl-CoA[er]                      | 1 C00040[a] -> 1 C00040[er]                                                                                              | Organellar Transport | 1 | -1000 | 1000 | 0 |         |
| O40       | palmitoyl-CoA[er]                 | 1 C00154[c] -> 1 C00154[er]                                                                                              | Organellar Transport | 1 | -1000 | 1000 | 0 |         |
| O41       | 1D-myo-inositol-3-phosphate[er]   | 1 C04006[c] -> 1 C04006[er]                                                                                              | Organellar Transport | 1 | -1000 | 1000 | 0 |         |
| O42       | CDP-choline[er]                   | 1 C00307[c] -> 1 C00307[er]                                                                                              | Organellar Transport | 1 | -1000 | 1000 | 0 |         |
| O43       | sn-glycerol-3-phosphate[er]       | 1 C00093[c] -> 1 C00093[er]                                                                                              | Organellar Transport | 1 | -1000 | 1000 | 0 |         |
| O44       | sn-glycero-3-phosphocholine[er]   | 1 C00670[er] -> 1 C00670[c]                                                                                              | Organellar Transport | 1 | -1000 | 1000 | 0 |         |
| O45       | ATP[m]                            | 1 C00002[c] -> 1 C00002[m]                                                                                               | Organellar Transport | 1 | -1000 | 1000 | 0 |         |

|     |                                   |                                                                                    |                         |   |       |      |   |
|-----|-----------------------------------|------------------------------------------------------------------------------------|-------------------------|---|-------|------|---|
| O46 | ADP[m]                            | 1 C00008[m] -> 1 C00008[c]                                                         | Organellar Transport    | 1 | -1000 | 1000 | 0 |
| O47 | AMP[m]                            | 1 C00020[m] -> 1 C00020[c]                                                         | Organellar Transport    | 1 | -1000 | 1000 | 0 |
| O48 | CTP[m]                            | 1 C00063[c] + 1 C00055[m] + 1 C00013[m] -> 1 C00055[c] + 1 C00063[m] + 1 C00013[c] | Organellar Transport    | 1 | -1000 | 1000 | 0 |
| O49 | phosphate[m]                      | 1 C00009[m] -> 1 C00009[c]                                                         | Organellar Transport    | 1 | -1000 | 1000 | 0 |
| O50 | diphosphate[m]                    | 1 C00013[m] -> 1 C00013[c]                                                         | Organellar Transport    | 1 | -1000 | 1000 | 0 |
| O51 | NAD+[m]                           | 1 C00003[m] -> 1 C00003[c]                                                         | Organellar Transport    | 1 | -1000 | 1000 | 0 |
| O52 | NADH[m]                           | 1 C00004[m] -> 1 C00004[c]                                                         | Organellar Transport    | 1 | -1000 | 1000 | 0 |
| O53 | NADP+[m]                          | 1 C00006[m] -> 1 C00006[c]                                                         | Organellar Transport    | 1 | -1000 | 1000 | 0 |
| O54 | NADPH[m]                          | 1 C00005[c] -> 1 C00005[m]                                                         | Organellar Transport    | 1 | -1000 | 1000 | 0 |
| O55 | H+[m]                             | 1 C00080[m] -> 1 C00080[c]                                                         | Organellar Transport    | 1 | -1000 | 1000 | 0 |
| O56 | H2O2[m]                           | 1 C00027[m] -> 1 C00027[c]                                                         | Organellar Transport    | 1 | -1000 | 1000 | 0 |
| O57 | O2[m]                             | 1 C00007[c] -> 1 C00007[m]                                                         | Organellar Transport    | 1 | -1000 | 1000 | 0 |
| O58 | H2O[m]                            | 1 C00001[m] -> 1 C00001[c]                                                         | Organellar Transport    | 1 | -1000 | 1000 | 0 |
| O59 | CO2[m]                            | 1 C00011[m] -> 1 C00011[c]                                                         | Organellar Transport    | 1 | -1000 | 1000 | 0 |
| O60 | NH3[m]                            | 1 C00014[m] -> 1 C00014[c]                                                         | Organellar Transport    | 1 | -1000 | 1000 | 0 |
| O61 | L-aspartate[m]                    | 1 C00049[c] + 1 C00002[c] + 1 C00001[c] -> 1 C00049[m] + 1 C00008[c] + 1 C00009[c] | Organellar Transport    | 1 | -1000 | 1000 | 0 |
| O62 | L-cysteine[m]                     | 1 C00097[c] + 1 C00002[c] + 1 C00001[c] -> 1 C00097[m] + 1 C00008[c] + 1 C00009[c] | Organellar Transport    | 1 | -1000 | 1000 | 0 |
| O63 | L-isoleucine[m]                   | 1 C00407[c] + 1 C00002[c] + 1 C00001[c] -> 1 C00407[m] + 1 C00008[c] + 1 C00009[c] | Organellar Transport    | 1 | -1000 | 1000 | 0 |
| O64 | L-leucine[m]                      | 1 C00123[c] + 1 C00002[c] + 1 C00001[c] -> 1 C00123[m] + 1 C00008[c] + 1 C00009[c] | Organellar Transport    | 1 | -1000 | 1000 | 0 |
| O65 | L-valine[m]                       | 1 C00183[c] + 1 C00002[c] + 1 C00001[c] -> 1 C00183[m] + 1 C00008[c] + 1 C00009[c] | Organellar Transport    | 1 | -1000 | 1000 | 0 |
| O66 | L-serine[m]                       | 1 C00065[c] + 1 C00002[c] + 1 C00001[c] -> 1 C00065[m] + 1 C00008[c] + 1 C00009[c] | Organellar Transport    | 1 | -1000 | 1000 | 0 |
| O67 | glycine[m]                        | 1 C00037[m] -> 1 C00037[c]                                                         | Organellar Transport    | 1 | -1000 | 1000 | 0 |
| O68 | L-glutamate[m]                    | 1 C00025[m] -> 1 C00025[c]                                                         | Organellar Transport    | 1 | -1000 | 1000 | 0 |
| O69 | CoA[m]                            | 1 C00010[m] -> 1 C00010[c]                                                         | Organellar Transport    | 1 | -1000 | 1000 | 0 |
| O70 | pyruvate[m]                       | 1 C00022[c] + 1 C00002[c] + 1 C00001[c] -> 1 C00022[m] + 1 C00008[c] + 1 C00009[c] | Organellar Transport    | 1 | -1000 | 1000 | 0 |
| O71 | citrate[m]                        | 1 C00158[m] -> 1 C00158[c]                                                         | Organellar Transport    | 1 | -1000 | 1000 | 0 |
| O72 | (S)-dihydrooorotate[m]            | 1 C00337[c] + 1 C00002[c] + 1 C00001[c] -> 1 C00337[m] + 1 C00008[c] + 1 C00009[c] | Organellar Transport    | 1 | -1000 | 1000 | 0 |
| O73 | orotate[m]                        | 1 C00295[m] -> 1 C00295[c]                                                         | Organellar Transport    | 1 | -1000 | 1000 | 0 |
| O74 | (R)-pantoatem                     | 1 C00522[m] -> 1 C00522[c]                                                         | Organellar Transport    | 1 | -1000 | 1000 | 0 |
| O75 | pantothenate[m]                   | 1 C00864[c] + 1 C00002[c] + 1 C00001[c] -> 1 C00864[m] + 1 C00008[c] + 1 C00009[c] | Organellar Transport    | 1 | -1000 | 1000 | 0 |
| O76 | dimethylallyl-diphosphate[a/m]    | 1 C00235[a] + 1 C00002[c] + 1 C00001[c] -> 1 C00235[m] + 1 C00008[c] + 1 C00009[c] | Organellar Transport    | 1 | -1000 | 1000 | 0 |
| O77 | isopentenyl-diphosphate[a/m]      | 1 C00129[a] + 1 C00002[c] + 1 C00001[c] -> 1 C00129[m] + 1 C00008[c] + 1 C00009[c] | Organellar Transport    | 1 | -1000 | 1000 | 0 |
| O78 | N6-(1,2-Dicarboxyethyl)-AMP[m]    | 1 C03794[c] -> 1 C03794[m]                                                         | Organellar Transport    | 1 | -1000 | 1000 | 0 |
| O79 | 5-aminolevulinate[a/m]            | 1 C00430[m] -> 1 C00430[a]                                                         | Organellar Transport    | 1 | -1000 | 1000 | 0 |
| O80 | tetrahydrofolate[m]               | 1 C00101[c] + 1 C00002[c] + 1 C00001[c] -> 1 C00101[m] + 1 C00008[c] + 1 C00009[c] | Organellar Transport    | 1 | -1000 | 1000 | 0 |
| O81 | 5,10-methylenetetrahydrofolate[m] | 1 C00143[m] -> 1 C00143[c]                                                         | Organellar Transport    | 1 | -1000 | 1000 | 0 |
| O82 | coproporphyrinogen-III            | 1 C03263[a] -> 1 C03263[c]                                                         | Organellar Transport    | 1 | -1000 | 1000 | 0 |
| O83 | protoporphyrinogen-IX             | 1 C01079[c] -> 1 C01079[m]                                                         | Organellar Transport    | 1 | -1000 | 1000 | 0 |
| O84 | heme                              | 1 C00032[m] -> 1 C00032[c]                                                         | Organellar Transport    | 1 | -1000 | 1000 | 0 |
| O85 | ferrocytochrome-c                 | 1 C00126[c] -> 1 C00126[m]                                                         | Organellar Transport    | 1 | -1000 | 1000 | 0 |
| T1  | spermine import                   | 1 C00002[c] + 1 C00001[c] -> 1 C00008[c] + 1 C00009[c] + 1 C00750[c]               | Extracellular Transport | 0 | 0     | 1000 | 0 |
| T2  | arginine transport                | 1 C00002[c] + 1 C00001[c] -> 1 C00008[c] + 1 C00009[c] + 1 C00062[c]               | Extracellular Transport | 0 | 0     | 1000 | 0 |
| T3  | ornithine transport               | 1 C00002[c] + 1 C00001[c] -> 1 C00008[c] + 1 C00009[c] + 1 C00077[c]               | Extracellular Transport | 0 | 0     | 1000 | 0 |
| T4  | glucose transport                 | 1 C00002[c] + 1 C00001[c] -> 1 C00008[c] + 1 C00009[c] + 1 C00092[c]               | Extracellular Transport | 0 | 0     | 10   | 0 |
| T5  | folic acid transport              | 1 C00002[c] + 1 C00001[c] -> 1 C00008[c] + 1 C00009[c] + 1 C00504[c]               | Extracellular Transport | 0 | 0     | 1000 | 0 |
| T6  | adenosine transport               | 1 C00002[c] + 1 C00001[c] -> 1 C00008[c] + 1 C00009[c] + 1 C00212[c]               | Extracellular Transport | 0 | 0     | 1000 | 0 |
| T7  | tryptophan transport              | 1 C00002[c] + 1 C00001[c] -> 1 C00008[c] + 1 C00009[c] + 1 C00078[c]               | Extracellular Transport | 0 | 0     | 1000 | 0 |
| T8  | cysteine transport                | 1 C00002[c] + 1 C00001[c] -> 1 C00008[c] + 1 C00009[c] + 1 C00097[c]               | Extracellular Transport | 0 | 0     | 1000 | 0 |
| T9  | histidine transport               | 1 C00002[c] + 1 C00001[c] -> 1 C00008[c] + 1 C00009[c] + 1 C00135[c]               | Extracellular Transport | 0 | 0     | 1000 | 0 |
| T10 | threonine transport               | 1 C00002[c] + 1 C00001[c] -> 1 C00008[c] + 1 C00009[c] + 1 C00188[c]               | Extracellular Transport | 0 | 0     | 1000 | 0 |
| T11 | isoleucine transport              | 1 C00002[c] + 1 C00001[c] -> 1 C00008[c] + 1 C00009[c] + 1 C00407[c]               | Extracellular Transport | 0 | 0     | 1000 | 0 |
| T12 | leucine transport                 | 1 C00002[c] + 1 C00001[c] -> 1 C00008[c] + 1 C00009[c] + 1 C00123[c]               | Extracellular Transport | 0 | 0     | 1000 | 0 |
| T13 | methionine transport              | 1 C00002[c] + 1 C00001[c] -> 1 C00008[c] + 1 C00009[c] + 1 C00073[c]               | Extracellular Transport | 0 | 0     | 1000 | 0 |
| T14 | phenylalanine transport           | 1 C00002[c] + 1 C00001[c] -> 1 C00008[c] + 1 C00009[c] + 1 C00079[c]               | Extracellular Transport | 0 | 0     | 1000 | 0 |
| T15 | tyrosine transport                | 1 C00002[c] + 1 C00001[c] -> 1 C00008[c] + 1 C00009[c] + 1 C00082[c]               | Extracellular Transport | 0 | 0     | 1000 | 0 |
| T16 | valine transport                  | 1 C00002[c] + 1 C00001[c] -> 1 C00008[c] + 1 C00009[c] + 1 C00183[c]               | Extracellular Transport | 0 | 0     | 1000 | 0 |
| T17 | cholesterol transport             | -> 1 C00187[c]                                                                     | Extracellular Transport | 0 | 0     | 1000 | 0 |
| T18 | choline transport                 | 1 C00002[c] + 1 C00001[c] -> 1 C00008[c] + 1 C00009[c] + 1 C00114[c]               | Extracellular Transport | 0 | 0     | 1000 | 0 |
| T19 | adenine transport                 | 1 C00002[c] + 1 C00001[c] -> 1 C00008[c] + 1 C00009[c] + 1 C00147[c]               | Extracellular Transport | 0 | 0     | 1000 | 0 |
| T20 | serine transport                  | 1 C00002[c] + 1 C00001[c] -> 1 C00008[c] + 1 C00009[c] + 1 C00065[c]               | Extracellular Transport | 0 | 0     | 1000 | 0 |
| T21 | Iron (II) ion transport           | 1 C00002[c] + 1 C00001[c] -> 1 C00008[c] + 1 C00009[c] + 1 C14818[c]               | Extracellular Transport | 0 | 0     | 1000 | 0 |
| T22 | (S)-lactate transport             | 1 C00186[c] ->                                                                     | Extracellular Transport | 0 | 0     | 1000 | 0 |
| X1  | oxidative stress                  | -> 1 C00704[c]                                                                     | Stress                  | 0 | 0     | 0    | 0 |
| D1  | water                             | 1 C00001[c] ->                                                                     | Diffusion               | 1 | -1000 | 1000 | 0 |
| D2  | oxygen import                     | -> 1 C00007[c]                                                                     | Diffusion               | 0 | 0     | 20   | 0 |



|           |                                                    |                                                                      |                         |   |       |      |   |
|-----------|----------------------------------------------------|----------------------------------------------------------------------|-------------------------|---|-------|------|---|
| D3        | CO2 export                                         | 1 C00011[c] ->                                                       | Diffusion               | 0 | 0     | 1000 | 0 |
| D4        | NH3 import                                         | 1 C00014[c] ->                                                       | Diffusion               | 0 | 0     | 5    | 0 |
| D5        | diphosphate                                        | 1 C00013[c] ->                                                       | Diffusion               | 1 | -10   | 10   | 0 |
| D6        | phosphate                                          | 1 C00009[c] ->                                                       | Diffusion               | 1 | -1000 | 1000 | 0 |
| D7        | ethanol                                            | 1 C00469[c] ->                                                       | Diffusion               | 1 | -1000 | 1000 | 0 |
| Demand    | acyl carrier protein                               | -> 1 C00229[a]                                                       | Demand                  | 0 | 0     | 1000 | 0 |
| Sink1     | 4-aminobutanoate                                   | 1 C00334[c] ->                                                       | Sink                    | 1 | -1000 | 1000 | 0 |
| Sink2     | formate                                            | 1 C00058[c] ->                                                       | Sink                    | 1 | -1000 | 1000 | 0 |
| Sink3     | 3-acetamidopropanal                                | 1 C18170[c] ->                                                       | Sink                    | 1 | -1000 | 1000 | 0 |
| Sink4     | 5,10-methylenetetrahydrofolate[m]                  | 1 C00143[m] ->                                                       | Sink                    | 1 | -1000 | 1000 | 0 |
| Sink5     | glycolaldehyde                                     | 1 C00266[c] ->                                                       | Sink                    | 0 | 0     | 1000 | 0 |
| Sink6     | 3,4-dihydroxy-L-phenylalanine                      | 1 C00355[c] ->                                                       | Sink                    | 0 | 0     | 1000 | 0 |
| 3.2.1.20  | alpha-glucosidase                                  | 1 C00089[c] + 1 C00001[c] -> 1 C00095[c] + 1 C00031[c]               | Misc                    | 0 | 0     | 1000 | 0 |
| T23       | Sucrose transport                                  | 1 C00002[c] + 1 C00001[c] -> 1 C00008[c] + 1 C00009[c] + 1 C00089[c] | Extracellular Transport | 0 | 0     | 10   | 0 |
| 2.7.1.1b  | hexokinase                                         | 1 C00002[c] + 1 C00095[c] -> C00008[c] + 1 C00085[c]                 | Misc                    | 0 | 0     | 1000 | 0 |
| T24       | Fructose transport                                 | 1 C00002[c] + 1 C00001[c] -> 1 C00008[c] + 1 C00009[c] + 1 C00095[c] | Extracellular Transport | 0 | 0     | 10   | 0 |
| 4.3.1.19a | L-threonine ammonia-lyase (2-oxobutanoate-forming) | 1 C00188[c] -> 1 C00109[c] + 1 C00014[c]                             | Misc                    | 0 | 0     | 1000 | 0 |
| 4.3.1.19b | L-serine ammonia-lyase                             | 1 C00065[c] -> 1 C00022[c] + 1 C00014[c]                             | Misc                    | 1 | -1000 | 1000 | 0 |
| T25       | 2-oxobutanoate                                     | 1 C00109[c] ->                                                       | Extracellular Transport | 1 | -1000 | 1000 | 0 |
