# Supplementary figures and images for: Systems-Based Analysis of the Sarcocystis neurona Genome Identifies Pathways That Contribute to a Heteroxenous Life Cycle
Source: PubMed Central journal article supplement — mBio. 2015 Feb 10;6(1):e02445-14. doi: 10.1128/mBio.02445-14 (PMC4337577; doi:10.1128/mbio.02445-14), 2015-02-10

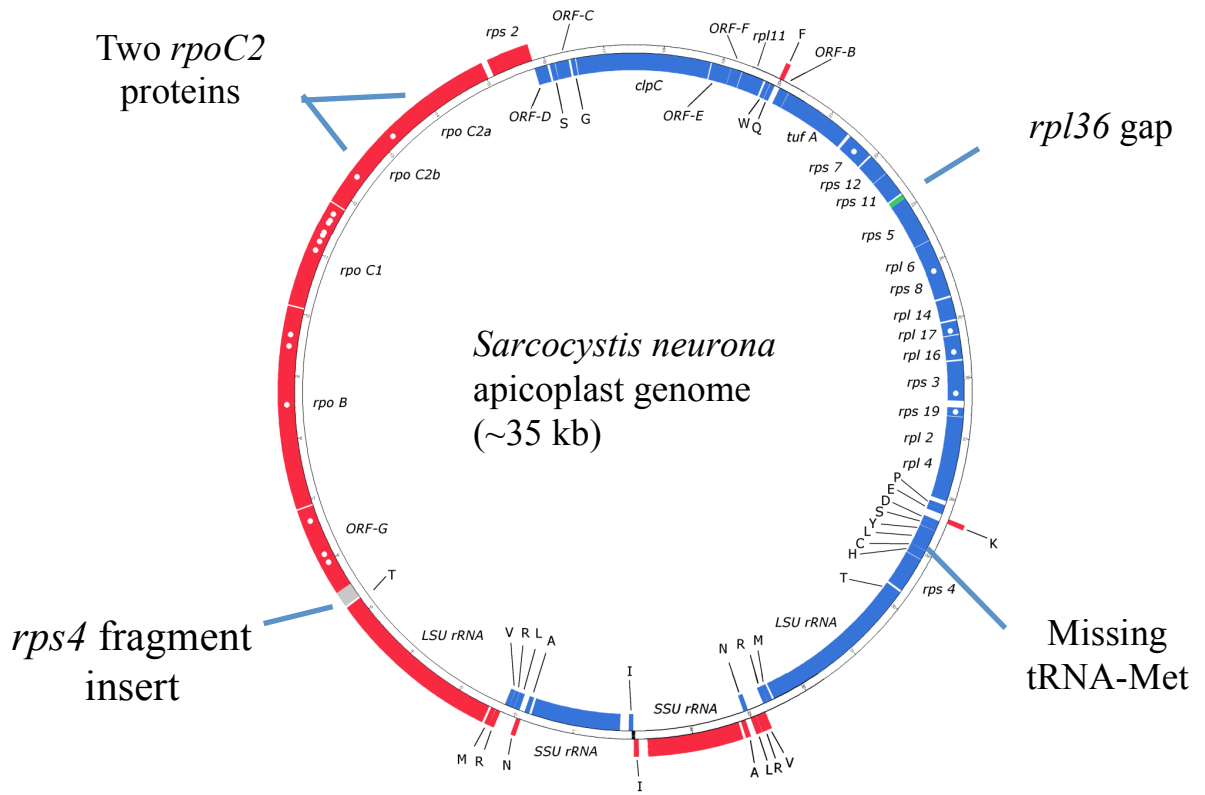

Supplement: mbo004142136sf1.pdf [file mbo004142136sf1.pdf]

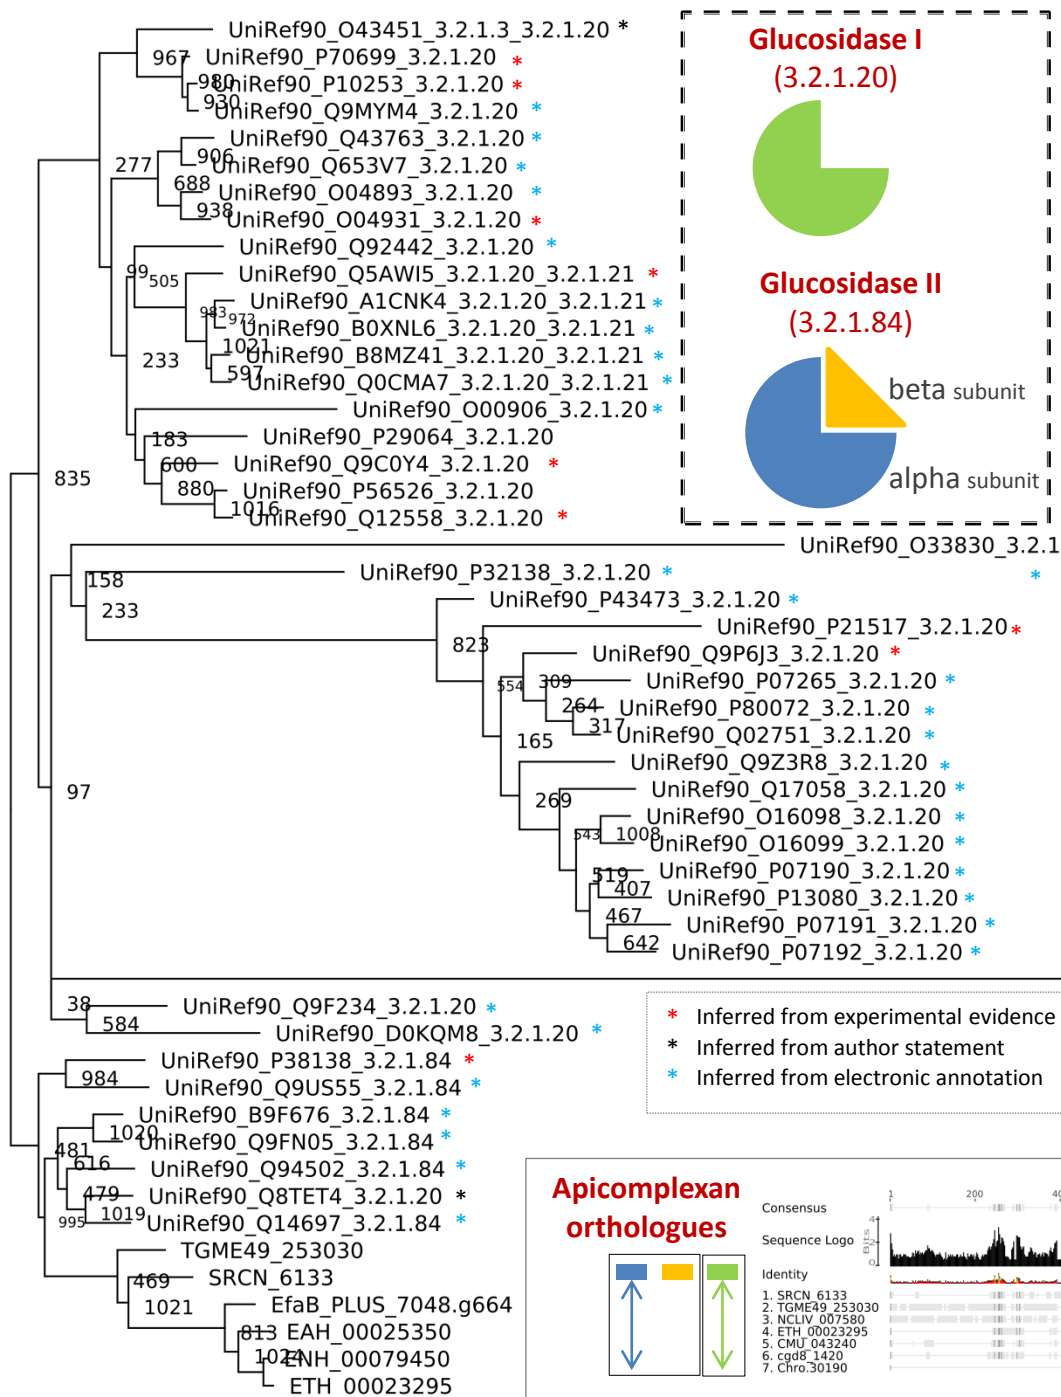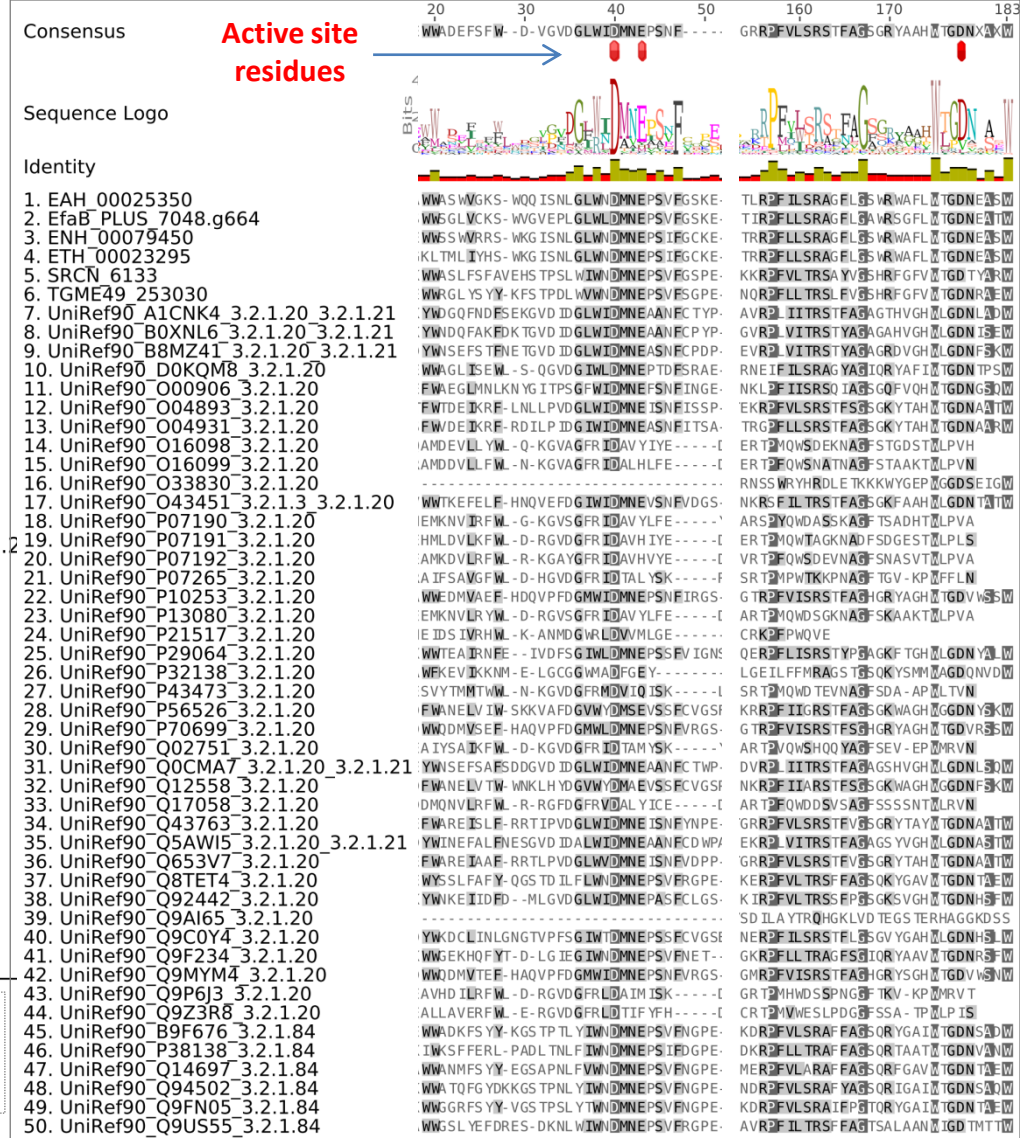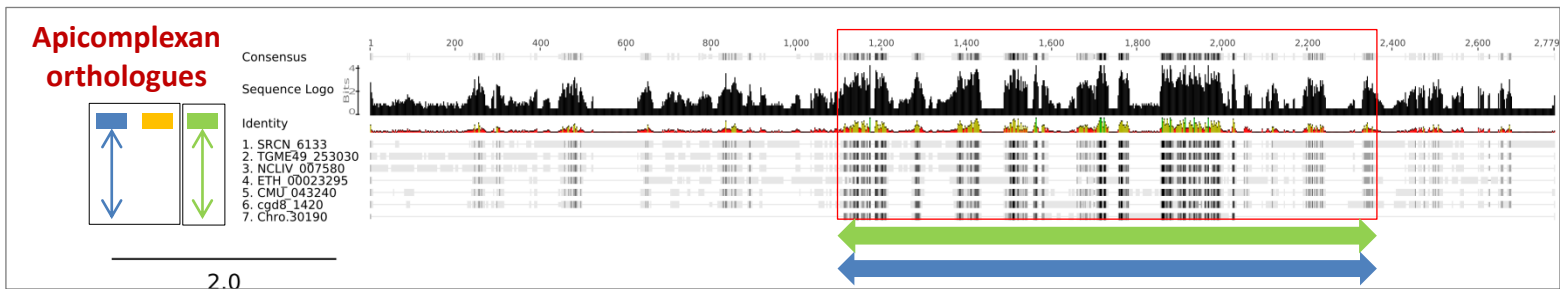

Supplement: mbo004142136sf5.pdf [file mbo004142136sf5.pdf]
